# Supplementary material for: A novel chemotactic factor derived from the extracellular matrix protein decorin recruits mesenchymal stromal cells in vitro and in vivo
Source: PubMed Central journal article supplement (PMC7357784; doi:10.1371/journal.pone.0235784), 2020-07-13
Supplement: pone.0235784.s005.pdf [file pone.0235784.s005.pdf]

## **S4 Fig MASCOT Search Results – Trypsin Sample**

**MASCOT** SCIENCE Mascot Search Results

User :  
 Email :  
 Search title : Submitted from Extraction 17432 by Mascot Daemon on APAF-WS-08  
 MS data file : \\apaf-hpv-file\projects\External\17432\_VicUniWell\_SandiDempsey\_20150209\1\_MassSpec\5600\Run1\Results\150213\_P17432\_SD1096-1\_1.MGF  
 Database : sp\_sheep\_140625 sheep\_140625\_ (647 sequences; 258179 residues)  
 Timestamp : 15 Feb 2015 at 21:52:32 GMT  
 Protein hits : [Q9TTE2](#) sp|[Q9TTE2](#)|[PGS2\\_SHEEP](#) Decorin OS=Ovis aries GN=DCN PE=2 SV=1  
[P60713](#) sp|P60713|ACTB\_SHEEP Actin, cytoplasmic 1 OS=Ovis aries GN=ACTB PE=2 SV=1  
[Q9MZA9](#) sp|Q9MZA9|VIME\_SHEEP Vimentin (Fragment) OS=Ovis aries GN=VIM PE=2 SV=3  
[O77727](#) sp|O77727|K1C15\_SHEEP Keratin, type I cytoskeletal 15 OS=Ovis aries GN=KRT15 PE=2 SV=1  
[O46390](#) sp|O46390|PGS1\_SHEEP Biglycan OS=Ovis aries GN=BGN PE=2 SV=1  
[Q6B7M7](#) sp|Q6B7M7|COP1\_SHEEP Cofilin-1 OS=Ovis aries GN=CFL1 PE=2 SV=3  
[P68251](#) sp|P68251|1433B\_SHEEP 14-3-3 protein beta/alpha (Fragments) OS=Ovis aries GN=YWHAB PE=1 SV=2  
[Q6YNC8](#) sp|Q6YNC8|H2AZ\_SHEEP Histone H2A.Z OS=Ovis aries GN=H2AFZ PE=2 SV=3  
[P62896](#) sp|P62896|CYC\_SHEEP Cytochrome c OS=Ovis aries GN=CYCS PE=1 SV=2  
[Q9BGM5](#) sp|Q9BGM5|K1C25\_SHEEP Keratin, type I cytoskeletal 25 OS=Ovis aries GN=KRT25 PE=2 SV=1  
[Q28554](#) sp|Q28554|G3P\_SHEEP Glyceraldehyde-3-phosphate dehydrogenase (Fragment) OS=Ovis aries GN=GAPDH PE=2 SV=4  
[P15241](#) sp|P15241|K2M2\_SHEEP Keratin, type II microfibrillar, component 7C OS=Ovis aries PE=1 SV=1  
[P21814](#) sp|P21814|UTMP\_SHEEP Uterine milk protein OS=Ovis aries PE=1 SV=2  
[Q83957](#) sp|Q83957|NCAP\_ORSVW Nucleoprotein OS=Ovine respiratory syncytial virus (strain WSU 83-1578) GN=N PE=2 SV=1  
[P01318](#) sp|P01318|INS\_SHEEP Insulin OS=Ovis aries GN=INS PE=1 SV=2  
[P03370](#) sp|P03370|POL\_VILV Pol polyprotein OS=Maedi visna virus (strain 1514) GN=pol PE=3 SV=1  
[POC276](#) sp|POC276|RL40\_SHEEP Ubiquitin-60S ribosomal protein L40 OS=Ovis aries GN=UBA52 PE=2 SV=2

sp\_sheep\_140625 [Decoy](#) False discovery rate

Peptide matches above identity threshold 104 3 2.88 %  
 Peptide matches above homology or identity threshold 104 3 2.88 %

**Mascot Score Histogram**

Ions score is  $-10 * \log(P)$ , where P is the probability that the observed match is a random event.  
 Individual ions scores > 19 indicate identity or extensive homology (p<0.01).  
 Protein scores are derived from ions scores as a non-probabilistic basis for ranking protein hits.

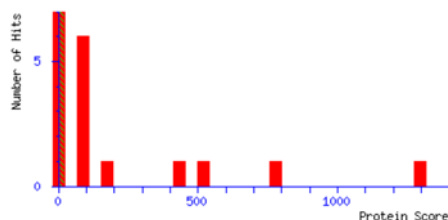

**Peptide Summary Report**

Format As Peptide Summary [Help](#)  
 Significance threshold p< 0.01 Max. number of hits AUTO Show Percolator scores   
 Standard scoring  MudPIT scoring  Ions score or expect cut-off 19 Show sub-sets 0  
 Show pop-ups  Suppress pop-ups  Sort unassigned Decreasing Score Require bold red

Select All Select None Search Selected  Error tolerant Archive Report

1. [Q9TTE2](#) Mass: 39947 Score: 1295 Matches: 30(30) Sequences: 5(5) emPAI: 0.89

[sp|Q9TTE2|PGS2\\_SHEEP](#) Decorin OS=Ovis aries GN=DCN PE=2 SV=1

Check to include this hit in error tolerant search or archive report

| Query                                                    | Observed | Mr(expt)  | Mr(calc)  | ppm   | Miss | Score | Expect   | Rank | Unique | Peptide                |
|----------------------------------------------------------|----------|-----------|-----------|-------|------|-------|----------|------|--------|------------------------|
| <input checked="" type="checkbox"/> <a href="#">476</a>  | 550.3283 | 1098.6420 | 1098.6437 | -1.56 | 0    | (59)  | 1.3e-006 | 1    | U      | K.ISPGAFAPLVK.L        |
| <input checked="" type="checkbox"/> <a href="#">477</a>  | 550.3284 | 1098.6423 | 1098.6437 | -1.27 | 0    | (65)  | 2.8e-007 | 1    | U      | K.ISPGAFAPLVK.L        |
| <input checked="" type="checkbox"/> <a href="#">478</a>  | 550.3287 | 1098.6428 | 1098.6437 | -0.83 | 0    | (51)  | 8.2e-006 | 1    | U      | K.ISPGAFAPLVK.L        |
| <input checked="" type="checkbox"/> <a href="#">479</a>  | 550.3288 | 1098.6430 | 1098.6437 | -0.67 | 0    | 66    | 2.5e-007 | 1    | U      | K.ISPGAFAPLVK.L        |
| <input checked="" type="checkbox"/> <a href="#">586</a>  | 389.2077 | 1164.6014 | 1164.6026 | -1.10 | 1    | (46)  | 2.5e-005 | 1    | U      | K.ITEIKDGFK.N          |
| <input checked="" type="checkbox"/> <a href="#">587</a>  | 389.2077 | 1164.6014 | 1164.6026 | -1.08 | 1    | (49)  | 1.3e-005 | 1    | U      | K.ITEIKDGFK.N          |
| <input checked="" type="checkbox"/> <a href="#">588</a>  | 389.2078 | 1164.6017 | 1164.6026 | -0.84 | 1    | (48)  | 1.8e-005 | 1    | U      | K.ITEIKDGFK.N          |
| <input checked="" type="checkbox"/> <a href="#">589</a>  | 583.3082 | 1164.6018 | 1164.6026 | -0.69 | 1    | (57)  | 2e-006   | 1    | U      | K.ITEIKDGFK.N          |
| <input checked="" type="checkbox"/> <a href="#">590</a>  | 583.3082 | 1164.6018 | 1164.6026 | -0.69 | 1    | 61    | 8.3e-007 | 1    | U      | K.ITEIKDGFK.N          |
| <input checked="" type="checkbox"/> <a href="#">591</a>  | 583.3082 | 1164.6018 | 1164.6026 | -0.69 | 1    | (57)  | 2e-006   | 1    | U      | K.ITEIKDGFK.N          |
| <input checked="" type="checkbox"/> <a href="#">592</a>  | 583.3085 | 1164.6024 | 1164.6026 | -0.20 | 1    | (55)  | 3e-006   | 1    | U      | K.ITEIKDGFK.N          |
| <input checked="" type="checkbox"/> <a href="#">593</a>  | 583.3085 | 1164.6024 | 1164.6026 | -0.20 | 1    | (59)  | 1.3e-006 | 1    | U      | K.ITEIKDGFK.N          |
| <input checked="" type="checkbox"/> <a href="#">594</a>  | 583.3085 | 1164.6024 | 1164.6026 | -0.20 | 1    | (56)  | 2.7e-006 | 1    | U      | K.ITEIKDGFK.N          |
| <input checked="" type="checkbox"/> <a href="#">595</a>  | 583.3085 | 1164.6024 | 1164.6026 | -0.20 | 1    | (54)  | 4e-006   | 1    | U      | K.ITEIKDGFK.N          |
| <input checked="" type="checkbox"/> <a href="#">596</a>  | 583.3085 | 1164.6024 | 1164.6026 | -0.20 | 1    | (58)  | 1.8e-006 | 1    | U      | K.ITEIKDGFK.N          |
| <input checked="" type="checkbox"/> <a href="#">597</a>  | 389.2081 | 1164.6024 | 1164.6026 | -0.20 | 1    | (58)  | 1.7e-006 | 1    | U      | K.ITEIKDGFK.N          |
| <input checked="" type="checkbox"/> <a href="#">598</a>  | 389.2082 | 1164.6028 | 1164.6026 | 0.16  | 1    | (51)  | 9e-006   | 1    | U      | K.ITEIKDGFK.N          |
| <input checked="" type="checkbox"/> <a href="#">797</a>  | 431.5934 | 1291.7584 | 1291.7612 | -2.15 | 0    | 73    | 5.3e-008 | 1    | U      | K.NLHTLILINNK.I        |
| <input checked="" type="checkbox"/> <a href="#">798</a>  | 646.8870 | 1291.7595 | 1291.7612 | -1.28 | 0    | (53)  | 5.5e-006 | 1    | U      | K.NLHTLILINNK.I        |
| <input checked="" type="checkbox"/> <a href="#">799</a>  | 646.8878 | 1291.7610 | 1291.7612 | -0.17 | 0    | (48)  | 1.7e-005 | 1    | U      | K.NLHTLILINNK.I        |
| <input checked="" type="checkbox"/> <a href="#">800</a>  | 646.8878 | 1291.7610 | 1291.7612 | -0.17 | 0    | (52)  | 6.3e-006 | 1    | U      | K.NLHTLILINNK.I        |
| <input checked="" type="checkbox"/> <a href="#">154</a>  | 431.5948 | 1291.7626 | 1291.7612 | 1.10  | 0    | (36)  | 0.00026  | 1    | U      | K.NLHTLILINNK.I        |
| <input checked="" type="checkbox"/> <a href="#">1205</a> | 833.9335 | 1665.8524 | 1665.8573 | -2.96 | 0    | 99    | 1.2e-010 | 1    | U      | K.DLPPDTALLDLQNNK.I    |
| <input checked="" type="checkbox"/> <a href="#">1206</a> | 833.9335 | 1665.8524 | 1665.8573 | -2.96 | 0    | (97)  | 2.4e-010 | 1    | U      | K.DLPPDTALLDLQNNK.I    |
| <input checked="" type="checkbox"/> <a href="#">1207</a> | 833.9335 | 1665.8524 | 1665.8573 | -2.96 | 0    | (87)  | 2e-009   | 1    | U      | K.DLPPDTALLDLQNNK.I    |
| <input checked="" type="checkbox"/> <a href="#">1208</a> | 833.9335 | 1665.8524 | 1665.8573 | -2.94 | 0    | (79)  | 1.4e-008 | 1    | U      | K.DLPPDTALLDLQNNK.I    |
| <input checked="" type="checkbox"/> <a href="#">1209</a> | 833.9335 | 1665.8524 | 1665.8573 | -2.94 | 0    | (94)  | 4.2e-010 | 1    | U      | K.DLPPDTALLDLQNNK.I    |
| <input checked="" type="checkbox"/> <a href="#">1210</a> | 556.2929 | 1665.8567 | 1665.8573 | -0.37 | 0    | (61)  | 9.3e-007 | 1    | U      | K.DLPPDTALLDLQNNK.I    |
| <input checked="" type="checkbox"/> <a href="#">1211</a> | 556.2929 | 1665.8568 | 1665.8573 | -0.34 | 0    | (94)  | 4.2e-010 | 1    | U      | K.DLPPDTALLDLQNNK.I    |
| <input checked="" type="checkbox"/> <a href="#">1460</a> | 664.3621 | 1990.0644 | 1990.0735 | -4.54 | 1    | 52    | 6.1e-006 | 1    | U      | K.VPKDLPPDTALLDLQNNK.I |

2. [P60713](#) Mass: 41710 Score: 797 Matches: 23(23) Sequences: 7(7) emPAI: 0.84

sp|P60713|ACTB\_SHEEP Actin, cytoplasmic 1 OS=Ovis aries GN=ACTB PE=2 SV=1

Check to include this hit in error tolerant search or archive report

| Query                | Observed | Mr(expt)  | Mr(calc)  | ppm   | Miss | Score | Expect   | Rank | Unique | Peptide                |
|----------------------|----------|-----------|-----------|-------|------|-------|----------|------|--------|------------------------|
| <a href="#">78</a>   | 398.2388 | 794.4630  | 794.4650  | -2.50 | 0    | (32)  | 0.00064  | 1    | U      | K.IIAPPER.K            |
| <a href="#">79</a>   | 398.2388 | 794.4630  | 794.4650  | -2.47 | 0    | (29)  | 0.0013   | 1    | U      | K.IIAPPER.K            |
| <a href="#">80</a>   | 398.2389 | 794.4633  | 794.4650  | -2.20 | 0    | 40    | 9.2e-005 | 1    | U      | K.IIAPPER.K            |
| <a href="#">535</a>  | 566.7669 | 1131.5193 | 1131.5197 | -0.27 | 0    | 45    | 3.1e-005 | 1    | U      | R.GYSFTTTAER.E         |
| <a href="#">536</a>  | 566.7671 | 1131.5196 | 1131.5197 | -0.00 | 0    | (42)  | 7e-005   | 1    | U      | R.GYSFTTTAER.E         |
| <a href="#">537</a>  | 566.7672 | 1131.5198 | 1131.5197 | 0.14  | 0    | (44)  | 4.2e-005 | 1    | U      | R.GYSFTTTAER.E         |
| <a href="#">538</a>  | 566.7685 | 1131.5224 | 1131.5197 | 2.47  | 0    | (43)  | 5.6e-005 | 1    | U      | R.GYSFTTTAER.E         |
| <a href="#">582</a>  | 581.3102 | 1160.6059 | 1160.6111 | -4.46 | 0    | 37    | 0.00043  | 1    | U      | K.EITALAPSTMK.I        |
| <a href="#">662</a>  | 400.2392 | 1197.6958 | 1197.6982 | -2.05 | 0    | 45    | 3.2e-005 | 1    | U      | R.AVFPISIVGRPR.H       |
| <a href="#">1097</a> | 506.2393 | 1515.6962 | 1515.6954 | 0.54  | 0    | 79    | 1.3e-008 | 1    | U      | K.QEYDESGPSIVHR.K      |
| <a href="#">1098</a> | 506.2394 | 1515.6964 | 1515.6954 | 0.70  | 0    | (71)  | 8.4e-008 | 1    | U      | K.QEYDESGPSIVHR.K      |
| <a href="#">1365</a> | 895.9486 | 1789.8826 | 1789.8846 | -1.11 | 0    | (67)  | 2.5e-007 | 1    | U      | K.SYELPDGQVITIGNER.F   |
| <a href="#">1366</a> | 597.6354 | 1789.8843 | 1789.8846 | -0.18 | 0    | 85    | 4.3e-009 | 1    | U      | K.SYELPDGQVITIGNER.F   |
| <a href="#">1367</a> | 597.6354 | 1789.8843 | 1789.8846 | -0.18 | 0    | (64)  | 5.3e-007 | 1    | U      | K.SYELPDGQVITIGNER.F   |
| <a href="#">1368</a> | 597.6354 | 1789.8843 | 1789.8846 | -0.18 | 0    | (65)  | 4.1e-007 | 1    | U      | K.SYELPDGQVITIGNER.F   |
| <a href="#">1369</a> | 597.6355 | 1789.8848 | 1789.8846 | 0.11  | 0    | (72)  | 7.8e-008 | 1    | U      | K.SYELPDGQVITIGNER.F   |
| <a href="#">1370</a> | 597.6355 | 1789.8848 | 1789.8846 | 0.11  | 0    | (56)  | 3.2e-006 | 1    | U      | K.SYELPDGQVITIGNER.F   |
| <a href="#">1371</a> | 597.6355 | 1789.8848 | 1789.8846 | 0.11  | 0    | (64)  | 4.8e-007 | 1    | U      | K.SYELPDGQVITIGNER.F   |
| <a href="#">1372</a> | 597.6355 | 1789.8848 | 1789.8846 | 0.11  | 0    | (63)  | 6.7e-007 | 1    | U      | K.SYELPDGQVITIGNER.F   |
| <a href="#">1373</a> | 895.9552 | 1789.8959 | 1789.8846 | 6.30  | 0    | (66)  | 3e-007   | 1    | U      | K.SYELPDGQVITIGNER.F   |
| <a href="#">1431</a> | 652.0268 | 1953.0555 | 1953.0571 | -0.81 | 0    | (42)  | 5.7e-005 | 1    | U      | R.VAPEEHPVLLTEAPLNPK.A |
| <a href="#">1432</a> | 652.0265 | 1953.0577 | 1953.0571 | -0.31 | 0    | (43)  | 5e-005   | 1    | U      | R.VAPEEHPVLLTEAPLNPK.A |
| <a href="#">1433</a> | 652.0271 | 1953.0595 | 1953.0571 | 1.23  | 0    | 48    | 1.6e-005 | 1    | U      | R.VAPEEHPVLLTEAPLNPK.A |

3. [Q9MZA9](#) Mass: 17161 Score: 524 Matches: 13(13) Sequences: 7(7) emPAI: 3.20

sp|Q9MZA9|VIM2\_SHEEP Vimentin (Fragment) OS=Ovis aries GN=VIM PE=2 SV=3

Check to include this hit in error tolerant search or archive report

| Query                | Observed | Mr(expt)  | Mr(calc)  | ppm   | Miss | Score | Expect   | Rank | Unique | Peptide            |
|----------------------|----------|-----------|-----------|-------|------|-------|----------|------|--------|--------------------|
| <a href="#">161</a>  | 435.7210 | 869.4274  | 869.4283  | -1.00 | 0    | 38    | 0.00016  | 1    | U      | R.FANYIDK.V        |
| <a href="#">200</a>  | 453.7364 | 905.4583  | 905.4607  | -2.56 | 0    | 36    | 0.00038  | 1    | U      | R.FLEQQNK.I        |
| <a href="#">507</a>  | 558.2944 | 1114.5742 | 1114.5618 | 11.1  | 0    | 38    | 0.00078  | 1    | U      | K.VELQELNDR.F      |
| <a href="#">526</a>  | 375.8723 | 1124.5952 | 1124.5978 | -2.31 | 1    | 63    | 4.6e-007 | 1    | U      | R.FANYIDKVR.F      |
| <a href="#">599</a>  | 585.3605 | 1168.7064 | 1168.7067 | -0.23 | 0    | (48)  | 1.7e-005 | 1    | U      | K.ILLAELEQLK.G     |
| <a href="#">600</a>  | 585.3605 | 1168.7065 | 1168.7067 | -0.11 | 0    | 59    | 1.2e-006 | 1    | U      | K.ILLAELEQLK.G     |
| <a href="#">601</a>  | 585.3609 | 1168.7072 | 1168.7067 | 0.47  | 0    | (48)  | 1.4e-005 | 1    | U      | K.ILLAELEQLK.G     |
| <a href="#">1121</a> | 770.4561 | 1538.8975 | 1538.9032 | -3.64 | 1    | (55)  | 3.5e-006 | 1    | U      | K.ILLAELEQLKGGQK.S |
| <a href="#">1122</a> | 513.9738 | 1538.8995 | 1538.9032 | -2.38 | 1    | (65)  | 2.9e-007 | 1    | U      | K.ILLAELEQLKGGQK.S |
| <a href="#">1123</a> | 513.9741 | 1538.9005 | 1538.9032 | -1.70 | 1    | 81    | 8.7e-009 | 1    | U      | K.ILLAELEQLKGGQK.S |
| <a href="#">1124</a> | 513.9744 | 1538.9013 | 1538.9032 | -1.20 | 1    | (56)  | 2.6e-006 | 1    | U      | K.ILLAELEQLKGGQK.S |
| <a href="#">1167</a> | 529.9372 | 1586.7897 | 1586.7900 | -0.21 | 1    | 96    | 3e-010   | 1    | U      | R.TNEKVELQELNDR.F  |
| <a href="#">1168</a> | 529.9374 | 1586.7902 | 1586.7900 | 0.15  | 1    | (88)  | 1.9e-009 | 1    | U      | R.TNEKVELQELNDR.F  |

4. [O77727](#) Mass: 48740 Score: 420 Matches: 12(12) Sequences: 6(6) emPAI: 0.48

sp|O77727|K1C15\_SHEEP Keratin, type I cytoskeletal 15 OS=Ovis aries GN=KRT15 PE=2 SV=1

Check to include this hit in error tolerant search or archive report

| Query               | Observed | Mr(expt)  | Mr(calc)  | ppm   | Miss | Score | Expect   | Rank | Unique | Peptide          |
|---------------------|----------|-----------|-----------|-------|------|-------|----------|------|--------|------------------|
| <a href="#">90</a>  | 404.2027 | 806.3907  | 806.3923  | -1.87 | 0    | (35)  | 0.00033  | 1    | U      | R.LAADDRF.L      |
| <a href="#">91</a>  | 404.2034 | 806.3921  | 806.3923  | -0.14 | 0    | (40)  | 0.00012  | 1    | U      | R.LAADDRF.L      |
| <a href="#">92</a>  | 404.2034 | 806.3923  | 806.3923  | 0.04  | 0    | 44    | 4.1e-005 | 1    | U      | R.LAADDRF.L      |
| <a href="#">101</a> | 412.2307 | 822.4469  | 822.4487  | -2.16 | 0    | (44)  | 4.3e-005 | 1    | U      | R.LASYLEK.V      |
| <a href="#">102</a> | 412.2312 | 822.4477  | 822.4487  | -1.14 | 0    | 44    | 4.1e-005 | 1    | U      | R.LASYLEK.V      |
| <a href="#">365</a> | 516.3010 | 1030.5874 | 1030.5910 | -3.48 | 0    | (44)  | 3.7e-005 | 1    | U      | R.VLDELTLTK.T    |
| <a href="#">366</a> | 516.3015 | 1030.5883 | 1030.5910 | -2.59 | 0    | (48)  | 1.6e-005 | 1    | U      | R.VLDELTLTK.T    |
| <a href="#">367</a> | 516.3017 | 1030.5889 | 1030.5910 | -2.09 | 0    | 58    | 1.6e-006 | 1    | U      | R.VLDELTLTK.T    |
| <a href="#">385</a> | 521.7992 | 1041.5839 | 1041.5818 | 1.99  | 0    | 63    | 4.5e-007 | 1    | U      | R.VLLEIDNAR.L    |
| <a href="#">387</a> | 522.2930 | 1042.5715 | 1042.5771 | -5.30 | 0    | 53    | 4.5e-006 | 1    | U      | K.ILAAIDNSR.V    |
| <a href="#">816</a> | 651.3319 | 1300.6492 | 1300.6510 | -1.39 | 0    | 87    | 3e-009   | 1    | U      | R.ALEEANADLEVK.I |
| <a href="#">817</a> | 651.3321 | 1300.6496 | 1300.6510 | -1.05 | 0    | (81)  | 1.2e-008 | 1    | U      | R.ALEEANADLEVK.I |

5. [O46390](#) Mass: 41497 Score: 172 Matches: 4(4) Sequences: 2(2) emPAI: 0.17

sp|O46390|PGS1\_SHEEP Biglycan OS=Ovis aries GN=BGN PE=2 SV=1

Check to include this hit in error tolerant search or archive report

| Query               | Observed | Mr(expt)  | Mr(calc)  | ppm   | Miss | Score | Expect   | Rank | Unique | Peptide         |
|---------------------|----------|-----------|-----------|-------|------|-------|----------|------|--------|-----------------|
| <a href="#">207</a> | 455.2732 | 908.5319  | 908.5331  | -1.37 | 0    | (34)  | 0.0004   | 1    | U      | R.VPAGLPDLK.L   |
| <a href="#">208</a> | 455.2735 | 908.5324  | 908.5331  | -0.80 | 0    | 54    | 4.1e-006 | 1    | U      | R.VPAGLPDLK.L   |
| <a href="#">828</a> | 656.8760 | 1311.7375 | 1311.7398 | -1.75 | 0    | (62)  | 5.8e-007 | 1    | U      | K.IQAIIELELLR.Y |
| <a href="#">829</a> | 656.8766 | 1311.7387 | 1311.7398 | -0.80 | 0    | 81    | 7.5e-009 | 1    | U      | K.IQAIIELELLR.Y |

6. [Q6B7M7](#) Mass: 18507 Score: 109 Matches: 2(2) Sequences: 2(2) emPAI: 0.40

sp|Q6B7M7|COF1\_SHEEP Cofilin-1 OS=Ovis aries GN=CFL1 PE=2 SV=3

Check to include this hit in error tolerant search or archive report

| Query               | Observed | Mr(expt)  | Mr(calc)  | ppm   | Miss | Score | Expect   | Rank | Unique | Peptide           |
|---------------------|----------|-----------|-----------|-------|------|-------|----------|------|--------|-------------------|
| <a href="#">866</a> | 669.3184 | 1336.6223 | 1336.6187 | 2.69  | 0    | 60    | 1.1e-006 | 1    | U      | R.YALYDATYETK.E   |
| <a href="#">868</a> | 670.8917 | 1339.7689 | 1339.7711 | -1.64 | 0    | 70    | 1.1e-007 | 1    | U      | K.LGSAVISLEGKPL.- |

7. [P68251](#) Mass: 22040 Score: 87 Matches: 3(3) Sequences: 2(2) emPAI: 0.33

sp|P68251|1433B\_SHEEP 14-3-3 protein beta/alpha (Fragments) OS=Ovis aries GN=YWHAB PE=1 SV=2

Check to include this hit in error tolerant search or archive report

| Query | Observed | Mr(expt) | Mr(calc) | ppm | Miss | Score | Expect | Rank | Unique | Peptide |
|-------|----------|----------|----------|-----|------|-------|--------|------|--------|---------|
|-------|----------|----------|----------|-----|------|-------|--------|------|--------|---------|

|   |                     |          |          |          |       |   |      |          |   |   |              |
|---|---------------------|----------|----------|----------|-------|---|------|----------|---|---|--------------|
| ✓ | <a href="#">197</a> | 452.2589 | 902.5032 | 902.5073 | -4.53 | 0 | 43   | 5.5e-005 | 1 | U | R.VISSIEQK.T |
| ✓ | <a href="#">203</a> | 454.2652 | 906.5159 | 906.5174 | -1.69 | 0 | 44   | 3.8e-005 | 1 |   | R.NLLSVAYK.N |
| ✓ | <a href="#">204</a> | 454.2652 | 906.5159 | 906.5174 | -1.69 | 0 | (40) | 0.00011  | 1 |   | R.NLLSVAYK.N |

Proteins matching the same set of peptides:

[P68253](#) Mass: 17989 Score: 87 Matches: 3(3) Sequences: 2(2)  
 sp|P68253|1433G\_SHEEP 14-3-3 protein gamma (Fragments) OS=Ovis aries GN=YWHAG PE=1 SV=1

8. [Q6YNC8](#) Mass: 13545 Score: 66 Matches: 3(3) Sequences: 1(1) emPAI: 0.25  
 sp|Q6YNC8|H2A2\_SHEEP Histone H2A.Z OS=Ovis aries GN=H2AFZ PE=2 SV=3  
 Check to include this hit in error tolerant search or archive report

| Query | Observed            | Mr(expt) | Mr(calc) | ppm      | Miss  | Score | Expect | Rank     | Unique | Peptide |               |
|-------|---------------------|----------|----------|----------|-------|-------|--------|----------|--------|---------|---------------|
| ✓     | <a href="#">242</a> | 472.7673 | 943.5200 | 943.5240 | -4.16 | 0     | (33)   | 0.00052  | 1      | U       | R.AGLQFPVGR.I |
| ✓     | <a href="#">243</a> | 472.7682 | 943.5219 | 943.5240 | -2.17 | 0     | 48     | 1.7e-005 | 1      | U       | R.AGLQFPVGR.I |
| ✓     | <a href="#">244</a> | 472.7685 | 943.5224 | 943.5240 | -1.68 | 0     | (25)   | 0.0035   | 1      | U       | R.AGLQFPVGR.I |

9. [P62896](#) Mass: 11696 Score: 50 Matches: 1(1) Sequences: 1(1) emPAI: 0.30  
 sp|P62896|CYC\_SHEEP Cytochrome c OS=Ovis aries GN=CYCS PE=1 SV=2  
 Check to include this hit in error tolerant search or archive report

| Query | Observed           | Mr(expt) | Mr(calc)  | ppm       | Miss | Score | Expect | Rank   | Unique | Peptide |                 |
|-------|--------------------|----------|-----------|-----------|------|-------|--------|--------|--------|---------|-----------------|
| ✓     | <a href="#">54</a> | 390.2125 | 1167.6156 | 1167.6149 | 0.58 | 0     | 50     | 2e-005 | 1      | U       | K.TGPNLHGLFGR.K |

10. [Q9BGM5](#) Mass: 49282 Score: 46 Matches: 2(2) Sequences: 1(1) emPAI: 0.14  
 sp|Q9BGM5|K1C25\_SHEEP Keratin, type I cytoskeletal 25 OS=Ovis aries GN=KRT25 PE=2 SV=1  
 Check to include this hit in error tolerant search or archive report

| Query | Observed            | Mr(expt) | Mr(calc)  | ppm       | Miss | Score | Expect | Rank     | Unique | Peptide |               |
|-------|---------------------|----------|-----------|-----------|------|-------|--------|----------|--------|---------|---------------|
| ✓     | <a href="#">422</a> | 532.8067 | 1063.5988 | 1063.5662 | 30.7 | 0     | (25)   | 0.0029   | 1      | U       | R.LASYLENVR.A |
| ✓     | <a href="#">423</a> | 355.5408 | 1063.6006 | 1063.5662 | 32.3 | 0     | 41     | 7.9e-005 | 1      | U       | R.LASYLENVR.A |

11. [Q28554](#) Mass: 34710 Score: 44 Matches: 1(1) Sequences: 1(1) emPAI: 0.10  
 sp|Q28554|G3P\_SHEEP Glyceraldehyde-3-phosphate dehydrogenase (Fragment) OS=Ovis aries GN=GAPDH PE=2 SV=4  
 Check to include this hit in error tolerant search or archive report

| Query | Observed            | Mr(expt) | Mr(calc)  | ppm       | Miss  | Score | Expect | Rank     | Unique | Peptide |                     |
|-------|---------------------|----------|-----------|-----------|-------|-------|--------|----------|--------|---------|---------------------|
| ✓     | <a href="#">911</a> | 685.3745 | 1368.7345 | 1368.7361 | -1.18 | 0     | 44     | 3.9e-005 | 1      | U       | R.GAAQNIIPASTGAAK.A |

12. [P15241](#) Mass: 53647 Score: 40 Matches: 2(2) Sequences: 2(2) emPAI: 0.13  
 sp|P15241|K2M2\_SHEEP Keratin, type II microfibrillar, component 7C OS=Ovis aries PE=1 SV=1  
 Check to include this hit in error tolerant search or archive report

| Query | Observed            | Mr(expt) | Mr(calc)  | ppm       | Miss  | Score | Expect | Rank    | Unique | Peptide |                 |
|-------|---------------------|----------|-----------|-----------|-------|-------|--------|---------|--------|---------|-----------------|
|       | <a href="#">200</a> | 453.7364 | 905.4583  | 905.4607  | -2.56 | 0     | 36     | 0.00038 | 1      |         | R.FLEQQNK.L     |
| ✓     | <a href="#">756</a> | 632.3501 | 1262.6857 | 1262.6870 | -1.03 | 0     | 25     | 0.0032  | 1      | U       | K.LGLDIEIATYR.R |

Proteins matching the same set of peptides:

[P25691](#) Mass: 55220 Score: 40 Matches: 2(2) Sequences: 2(2)  
 sp|P25691|K2M3\_SHEEP Keratin, type II microfibrillar, component 5 OS=Ovis aries PE=1 SV=1

13. [P21814](#) Mass: 49191 Score: 30 Matches: 4(4) Sequences: 1(1) emPAI: 0.07  
 sp|P21814|UTMP\_SHEEP Uterine milk protein OS=Ovis aries PE=1 SV=2  
 Check to include this hit in error tolerant search or archive report

| Query | Observed            | Mr(expt) | Mr(calc) | ppm      | Miss | Score | Expect | Rank   | Unique | Peptide |               |
|-------|---------------------|----------|----------|----------|------|-------|--------|--------|--------|---------|---------------|
| ✓     | <a href="#">292</a> | 492.3159 | 982.6173 | 982.5811 | 36.9 | 1     | (23)   | 0.0047 | 1      | U       | K.ALIAENPKK.N |
| ✓     | <a href="#">293</a> | 492.3160 | 982.6175 | 982.5811 | 37.0 | 1     | (23)   | 0.0052 | 1      | U       | K.ALIAENPKK.N |
| ✓     | <a href="#">294</a> | 492.3162 | 982.6179 | 982.5811 | 37.4 | 1     | 24     | 0.0043 | 1      | U       | K.ALIAENPKK.N |
| ✓     | <a href="#">295</a> | 492.3164 | 982.6183 | 982.5811 | 37.9 | 1     | (20)   | 0.0098 | 1      | U       | K.ALIAENPKK.N |

14. [Q83957](#) Mass: 43394 Score: 28 Matches: 2(2) Sequences: 1(1) emPAI: 0.08  
 sp|Q83957|NCAP\_ORSVW Nucleoprotein OS=Ovine respiratory syncytial virus (strain WSU 83-1578) GN=N PE=2 SV=1  
 Check to include this hit in error tolerant search or archive report

| Query | Observed            | Mr(expt) | Mr(calc)  | ppm       | Miss | Score | Expect | Rank   | Unique | Peptide |               |
|-------|---------------------|----------|-----------|-----------|------|-------|--------|--------|--------|---------|---------------|
| ✓     | <a href="#">399</a> | 524.7745 | 1047.5345 | 1047.5019 | 31.1 | 1     | 25     | 0.0041 | 1      | U       | R.QDVNGKEMK.F |
| ✓     | <a href="#">401</a> | 524.7747 | 1047.5349 | 1047.5019 | 31.5 | 1     | (24)   | 0.0056 | 1      | U       | R.QDVNGKEMK.F |

15. [P01318](#) Score: 28 Matches: 1(1) Sequences: 1(1) emPAI: 0.30  
 sp|P01318|INS\_SHEEP Insulin OS=Ovis aries GN=INS PE=1 SV=2  
 Check to include this hit in error tolerant search or archive report

| Query | Observed            | Mr(expt) | Mr(calc) | ppm      | Miss  | Score | Expect | Rank   | Unique | Peptide |             |
|-------|---------------------|----------|----------|----------|-------|-------|--------|--------|--------|---------|-------------|
| ✓     | <a href="#">152</a> | 430.2201 | 858.4256 | 858.4276 | -2.34 | 0     | 28     | 0.0017 | 1      | U       | R.GFFYTPK.A |

16. [P03370](#) Mass: 126558 Score: 26 Matches: 1(1) Sequences: 1(1) emPAI: 0.03  
 sp|P03370|POL\_VILV Pol polyprotein OS=Maedi visna virus (strain 1514) GN=pol PE=3 SV=1  
 Check to include this hit in error tolerant search or archive report

| Query | Observed            | Mr(expt) | Mr(calc)  | ppm       | Miss | Score | Expect | Rank   | Unique | Peptide |                                        |
|-------|---------------------|----------|-----------|-----------|------|-------|--------|--------|--------|---------|----------------------------------------|
| ✓     | <a href="#">902</a> | 680.3549 | 1358.6952 | 1358.6500 | 33.3 | 1     | 26     | 0.0049 | 1      | U       | R.AIEEACKQGPEK.M + Carbamidomethyl (C) |

Proteins matching the same set of peptides:

[P16901](#) Mass: 124437 Score: 26 Matches: 1(1) Sequences: 1(1)

sp|P16901|POL\_OMVVS Pol polyprotein OS=Ovine maedi visna related virus (strain South Africa) GN=pol PE=3 SV=1  
**P23426** Mass: 126548 Score: 26 Matches: 1(1) Sequences: 1(1)  
 sp|P23426|POL\_VILV1 Pol polyprotein OS=Maedi visna virus (strain 1514 / clone LV1-1KS1) GN=pol PE=3 SV=1  
**P23427** Mass: 126543 Score: 26 Matches: 1(1) Sequences: 1(1)  
 sp|P23427|POL\_VILV2 Pol polyprotein OS=Maedi visna virus (strain 1514 / clone LV1-1KS2) GN=pol PE=3 SV=1  
**P35956** Mass: 126098 Score: 26 Matches: 1(1) Sequences: 1(1)  
 sp|P35956|POL\_VILVK Pol polyprotein OS=Maedi visna virus (strain KV1772) GN=pol PE=1 SV=1

17. **POC276** Mass: 14719 Score: 25 Matches: 1(1) Sequences: 1(1) emPAI: 0.23  
 sp|POC276|RL40\_SHEEP Ubiquitin-60S ribosomal protein L40 OS=Ovis aries GN=UBA52 PE=2 SV=2  
 Check to include this hit in error tolerant search or archive report

| Query        | Observed | Mr(expt)  | Mr(calc)  | ppm   | Miss | Score | Expect | Rank | Unique | Peptide       |
|--------------|----------|-----------|-----------|-------|------|-------|--------|------|--------|---------------|
| ✓ <b>449</b> | 541.2789 | 1080.5432 | 1080.5451 | -1.81 | 0    | 25    | 0.0038 | 1    | U      | R.TLSDYNIQK.E |

Proteins matching the same set of peptides:

**POC655** Mass: 34305 Score: 25 Matches: 1(1) Sequences: 1(1)  
 sp|POC655|UBB\_SHEEP Polyubiquitin-B OS=Ovis aries GN=UBB PE=2 SV=1

Peptide matches not assigned to protein hits: (no details means no match)

| Query         | Observed | Mr(expt)  | Mr(calc)  | ppm    | Miss | Score | Expect | Rank | Unique | Peptide                                  |
|---------------|----------|-----------|-----------|--------|------|-------|--------|------|--------|------------------------------------------|
| ✓ <b>115</b>  | 416.2304 | 830.4463  | 830.4498  | -4.18  | 1    | 20    | 0.014  | 1    |        | SVDPKTKG                                 |
| ✓ <b>683</b>  | 611.3280 | 1220.6414 | 1220.6070 | -28.2  | 1    | 18    | 0.017  | 1    |        | SESIMKLEER                               |
| ✓ <b>755</b>  | 632.3501 | 1262.6856 | 1262.6870 | -1.09  | 0    | 18    | 0.017  | 1    |        | LGLDIEIATYR                              |
| ✓ <b>137</b>  | 425.7659 | 849.5173  | 849.5184  | -1.39  | 0    | 17    | 0.018  | 1    |        | HLQLAIR                                  |
| ✓ <b>903</b>  | 680.3560 | 1358.6974 | 1358.6500 | 34.9   | 1    | 17    | 0.076  | 1    |        | AIEEACKQGPEK + Carbamidomethyl (C)       |
| ✓ <b>49</b>   | 382.7141 | 763.4136  | 763.4228  | -12.10 | 0    | 16    | 0.022  | 1    |        | YILEAR                                   |
| ✓ <b>75</b>   | 394.7417 | 787.4689  | 787.4956  | -33.93 | 1    | 16    | 0.026  | 1    |        | KITWLK                                   |
| ✓ <b>151</b>  | 430.2200 | 858.4255  | 858.4276  | -2.11  | 0    | 16    | 0.026  | 1    |        | GGFYTPK                                  |
| ✓ <b>153</b>  | 430.2206 | 858.4266  | 858.4276  | -1.13  | 0    | 16    | 0.027  | 1    |        | GGFYTPK                                  |
| ✓ <b>138</b>  | 425.7660 | 849.5175  | 849.5184  | -1.08  | 0    | 16    | 0.027  | 1    |        | HLQLAIR                                  |
| ✓ <b>754</b>  | 632.3498 | 1262.6851 | 1262.6870 | -1.55  | 0    | 16    | 0.029  | 1    |        | LGLDIEIATYR                              |
| ✓ <b>74</b>   | 394.7416 | 787.4686  | 787.4956  | -34.21 | 1    | 16    | 0.028  | 1    |        | KITWLK                                   |
| ✓ <b>48</b>   | 382.7137 | 763.4129  | 763.4228  | -12.97 | 0    | 15    | 0.031  | 1    |        | YILEAR                                   |
| ✓ <b>334</b>  | 505.8144 | 1009.6142 | 1009.6172 | -2.94  | 0    | 14    | 0.038  | 1    |        | LIIGPLQEK                                |
| ✓ <b>411</b>  | 528.8071 | 1055.5997 | 1055.5836 | 15.3   | 1    | 14    | 0.043  | 1    |        | LIRQANEGR                                |
| ✓ <b>901</b>  | 680.3547 | 1358.6949 | 1358.6500 | 33.1   | 1    | 13    | 0.089  | 1    |        | AIEEACKQGPEK + Carbamidomethyl (C)       |
| ✓ <b>663</b>  | 400.2393 | 1197.6959 | 1197.6982 | -1.92  | 0    | 13    | 0.047  | 1    |        | AVFPSIVGRPR                              |
| ✓ <b>300</b>  | 495.2717 | 988.5288  | 988.5301  | -1.36  | 1    | 13    | 0.072  | 1    |        | SEITDLRR                                 |
| ✓ <b>498</b>  | 554.2933 | 1106.5720 | 1106.6270 | -49.67 | 1    | 12    | 0.16   | 1    |        | LFTIKNLCR                                |
| ✓ <b>41</b>   | 380.2383 | 758.4620  | 758.4538  | 10.8   | 0    | 12    | 0.076  | 1    |        | ITDIIGK                                  |
| ✓ <b>749</b>  | 630.8210 | 2519.2547 | 2519.2366 | 7.18   | 0    | 12    | 0.09   | 1    |        | SFTSQTYMDSSTVHLFVTIISR                   |
| ✓ <b>1489</b> | 680.7080 | 2039.1022 | 2039.0180 | 41.3   | 1    | 12    | 0.062  | 1    |        | MNTTDCFIADVNAIKEVR + Oxidation (M)       |
| ✓ <b>1519</b> | 691.6812 | 2072.0217 | 2072.0911 | -33.48 | 1    | 12    | 0.09   | 1    |        | VTGYALVGDKVMKPAHVK + Carbamidomethyl (C) |
| ✓ <b>140</b>  | 426.2166 | 850.4187  | 850.3855  | 39.1   | 0    | 12    | 0.086  | 1    |        | TCSVNEAK                                 |
| ✓ <b>25</b>   | 367.7305 | 733.4464  | 733.4374  | 12.2   | 0    | 12    | 0.067  | 1    |        | VLFDLK                                   |
| ✓ <b>684</b>  | 611.3281 | 1220.6416 | 1220.6070 | 28.4   | 1    | 12    | 0.07   | 1    |        | SESIMKLEER                               |
| ✓ <b>40</b>   | 379.2441 | 756.4737  | 756.4857  | -15.92 | 1    | 11    | 0.072  | 1    |        | LLDLRK                                   |
| ✓ <b>45</b>   | 381.2303 | 760.4460  | 760.4119  | 44.8   | 0    | 11    | 0.073  | 1    |        | WSVELK                                   |
| ✓ <b>483</b>  | 551.7962 | 1101.5778 | 1101.5666 | 10.2   | 0    | 11    | 0.11   | 1    |        | ASAAVSAAPTEK                             |
| ✓ <b>410</b>  | 528.8049 | 1055.5952 | 1055.5836 | 11.0   | 1    | 11    | 0.084  | 1    |        | LIRQANEGR                                |
| ✓ <b>168</b>  | 437.2328 | 872.4511  | 872.4464  | 5.34   | 1    | 11    | 0.28   | 1    |        | NNRSTSGPK                                |
| ✓ <b>609</b>  | 589.8393 | 1177.6640 | 1177.6231 | 34.8   | 0    | 11    | 0.083  | 1    |        | LVDTFLEDVK                               |
| ✓ <b>440</b>  | 538.8074 | 1075.6003 | 1075.6389 | -35.96 | 1    | 10    | 0.1    | 1    |        | EIKAFLLSR                                |
| ✓ <b>481</b>  | 550.8193 | 1099.6240 | 1099.5848 | 35.7   | 0    | 10    | 0.1    | 1    |        | YIYAVCHPLK + Carbamidomethyl (C)         |
| ✓ <b>23</b>   | 365.2258 | 728.4371  | 728.4181  | 26.2   | 0    | 10    | 0.13   | 1    |        | QAEILR                                   |
| ✓ <b>400</b>  | 524.7747 | 1047.5348 | 1047.5019 | 31.4   | 1    | 10    | 0.14   | 1    |        | QDVNGKEMK                                |
| ✓ <b>228</b>  | 465.2222 | 928.4297  | 928.4614  | -34.09 | 0    | 10    | 0.11   | 1    |        | ENDSPVLR                                 |
| ✓ <b>139</b>  | 426.2166 | 850.4186  | 850.3855  | 39.0   | 0    | 10    | 0.14   | 1    |        | TCSVNEAK                                 |
| ✓ <b>26</b>   | 367.7314 | 733.4482  | 733.4374  | 14.6   | 0    | 9     | 0.11   | 1    |        | VLFDLK                                   |
| ✓ <b>1053</b> | 371.6794 | 1482.6885 | 1482.7150 | -17.89 | 1    | 9     | 0.11   | 1    |        | RHHTDVGFMIDR                             |
| ✓ <b>1401</b> | 931.9813 | 3723.8960 | 3723.8236 | 19.4   | 1    | 9     | 0.25   | 1    |        | AMIQSALDGGSIENGNVATRDVDVFIACSEPIYR       |
| ✓ <b>482</b>  | 551.7961 | 1101.5777 | 1101.5666 | 10.1   | 0    | 9     | 0.17   | 1    |        | ASAAVSAAPTEK                             |
| ✓ <b>515</b>  | 560.3113 | 1118.6080 | 1118.6448 | -32.85 | 1    | 9     | 0.21   | 1    |        | LELYKQLR                                 |
| ✓ <b>398</b>  | 524.7739 | 1047.5332 | 1047.5019 | 29.9   | 1    | 9     | 0.19   | 1    |        | QDVNGKEMK                                |
| ✓ <b>610</b>  | 589.8421 | 1177.6696 | 1177.6231 | 39.6   | 0    | 8     | 0.15   | 1    |        | LVDTFLEDVK                               |
| ✓ <b>214</b>  | 457.2933 | 912.5720  | 912.5644  | 8.37   | 0    | 8     | 0.16   | 1    |        | VLLSSPAVK                                |
| ✓ <b>627</b>  | 394.8756 | 1181.6050 | 1181.6404 | -30.02 | 0    | 8     | 0.26   | 1    |        | VDTVSAAPGLR                              |
| ✓ <b>279</b>  | 485.7542 | 969.4938  | 969.5244  | -31.53 | 0    | 8     | 0.16   | 1    |        | VVSDPQIR                                 |
| ✓ <b>484</b>  | 551.7963 | 1101.5780 | 1101.5666 | 10.4   | 0    | 8     | 0.24   | 1    |        | ASAAVSAAPTEK                             |
| ✓ <b>44</b>   | 381.2303 | 760.4460  | 760.4119  | 44.8   | 0    | 8     | 0.17   | 1    |        | WSVELK                                   |
| ✓ <b>38</b>   | 379.2438 | 756.4730  | 756.4857  | -16.89 | 1    | 7     | 0.18   | 1    |        | LLDLRK                                   |
| ✓ <b>86</b>   | 402.6984 | 803.3823  | 803.4025  | -25.13 | 0    | 7     | 0.19   | 1    |        | ATDEQLK                                  |
| ✓ <b>291</b>  | 492.2796 | 982.5447  | 982.5811  | -37.06 | 1    | 7     | 0.19   | 1    |        | LIDPERIK                                 |
| ✓ <b>249</b>  | 475.7446 | 949.4747  | 949.4981  | -24.69 | 1    | 7     | 0.21   | 1    |        | EARSNVFK                                 |
| ✓ <b>83</b>   | 400.7341 | 799.4535  | 799.4341  | 24.4   | 0    | 7     | 0.2    | 1    |        | DLIHFR                                   |
| ✓ <b>822</b>  | 652.3350 | 1302.6554 | 1302.6905 | -26.96 | 1    | 7     | 0.27   | 1    |        | RAAPGDGPRPGPR                            |
| ✓ <b>142</b>  | 426.2170 | 850.4195  | 850.3855  | 40.0   | 0    | 7     | 0.27   | 1    |        | TCSVNEAK                                 |
| ✓ <b>493</b>  | 553.2912 | 1104.5679 | 1104.5788 | -9.85  | 1    | 7     | 0.2    | 1    |        | RQYLQQR                                  |
| ✓ <b>823</b>  | 652.3355 | 1302.6565 | 1302.6905 | -26.10 | 1    | 7     | 0.28   | 1    |        | RAAPGDGPRPGPR                            |
| ✓ <b>1651</b> | 654.0679 | 2612.2425 | 2612.2046 | 14.5   | 0    | 7     | 0.22   | 1    |        | SEFVLPSYFDQWIYSPMFNAR + Oxidation (M)    |
| ✓ <b>46</b>   | 381.2303 | 760.4460  | 760.4119  | 44.9   | 0    | 7     | 0.22   | 1    |        | WSVELK                                   |
| ✓ <b>437</b>  | 538.8056 | 1075.5967 | 1075.6389 | -39.29 | 1    | 7     | 0.26   | 1    |        | EIKAFLLSR                                |
| ✓ <b>171</b>  | 437.7517 | 873.4888  | 873.4709  | 20.6   | 0    | 7     | 0.22   | 1    |        | EAGVFVPR                                 |
| ✓ <b>1073</b> | 501.9295 | 1502.7666 | 1502.8133 | -31.08 | 0    | 6     | 0.3    | 1    |        | GDILQVFDGWILK                            |
| ✓ <b>441</b>  | 538.8076 | 1075.6006 | 1075.6389 | -35.64 | 1    | 6     | 0.23   | 1    |        | EIKAFLLSR                                |
| ✓ <b>36</b>   | 375.6956 | 749.3766  | 749.3530  | 31.4   | 0    | 6     | 0.28   | 1    |        | IMEWR + Oxidation (M)                    |
| ✓ <b>1040</b> | 490.9009 | 1469.6808 | 1469.6894 | -5.88  | 0    | 6     | 0.23   | 1    |        | LQVQSQEFLCKM + Oxidation (M)             |
| ✓ <b>413</b>  | 529.3007 | 1056.5868 | 1056.5637 | 21.9   | 0    | 6     | 0.24   | 1    |        | LDETMPIR                                 |
| ✓ <b>134</b>  | 423.2409 | 844.4672  | 844.4654  | 2.13   | 0    | 6     | 0.86   | 1    |        | SIEEIVR                                  |
| ✓ <b>110</b>  | 414.2182 | 826.4218  | 826.4007  | 25.5   | 0    | 6     | 0.25   | 1    |        | TRGFSTR + Oxidation (M)                  |
| ✓ <b>6</b>    | 351.1994 | 700.3843  | 700.3980  | -19.54 | 1    | 6     | 0.29   | 1    |        | ERAVAR                                   |
| ✓ <b>8</b>    | 353.2168 | 704.4191  | 704.3891  | 42.6   | 0    | 6     | 0.25   | 1    |        | MLVAAGK + Oxidation (M)                  |

|      |          |           |           |        |   |   |      |   |                                                         |
|------|----------|-----------|-----------|--------|---|---|------|---|---------------------------------------------------------|
| 872  | 448.2413 | 1341.7020 | 1341.7365 | -25.64 | 1 | 6 | 0.25 | 1 | APTASGSGGAIRGIK                                         |
| 313  | 497.2571 | 1488.7494 | 1488.8049 | -37.30 | 1 | 6 | 0.77 | 1 | FVPDGSVASRSVIR                                          |
| 248  | 475.7446 | 949.4747  | 949.4981  | -24.69 | 1 | 6 | 0.28 | 1 | EARSNVFK                                                |
| 84   | 400.7466 | 799.4786  | 799.4803  | -2.14  | 0 | 6 | 0.27 | 1 | AINELIK                                                 |
| 289  | 491.2498 | 980.4851  | 980.4419  | 44.0   | 0 | 6 | 1    | 1 | SSLPSMMGR + Oxidation (M)                               |
| 580  | 386.8820 | 1157.6241 | 1157.6193 | 4.10   | 1 | 6 | 0.28 | 1 | KDPTQAFVPR                                              |
| 1146 | 524.3021 | 1569.8846 | 1569.8151 | 44.2   | 0 | 5 | 0.29 | 1 | VTLVFEHVDQDLR                                           |
| 345  | 511.2742 | 1020.5339 | 1020.5577 | -23.31 | 1 | 5 | 0.3  | 1 | RTQPLNHR                                                |
| 290  | 492.2796 | 982.5446  | 982.5811  | -37.10 | 1 | 5 | 0.3  | 1 | LIDPERIK                                                |
| 489  | 552.7694 | 1103.5242 | 1103.5103 | 12.6   | 0 | 5 | 0.37 | 1 | GMEHLNLMK + 2 Oxidation (M)                             |
| 82   | 400.7335 | 799.4524  | 799.4341  | 23.0   | 0 | 5 | 0.31 | 1 | DLIHFR                                                  |
| 117  | 416.2502 | 830.4858  | 830.4498  | 43.4   | 0 | 5 | 0.35 | 1 | LENAGSLK                                                |
| 659  | 598.8220 | 1195.6295 | 1195.5880 | 34.7   | 0 | 5 | 0.31 | 1 | CGHTNNLRPK + Carbamidomethyl (C)                        |
| 1672 | 924.1470 | 2769.4191 | 2769.2981 | 43.7   | 1 | 5 | 0.31 | 1 | AEDGSVIDYELIDQDARDLYDAGVK                               |
| 392  | 523.8017 | 1045.5888 | 1045.5702 | 17.8   | 1 | 5 | 0.32 | 1 | LMLQNQR + Oxidation (M)                                 |
| 156  | 432.7138 | 863.4130  | 863.4501  | -42.94 | 1 | 5 | 0.32 | 1 | IKDAFDR                                                 |
| 1491 | 683.0295 | 2046.0668 | 2046.0647 | 1.05   | 1 | 5 | 0.44 | 1 | DRVGGLPAFLNTEFFIGNAR                                    |
| 415  | 529.3100 | 1056.6055 | 1056.6543 | -46.18 | 1 | 5 | 0.33 | 1 | LGIKSKGLLK                                              |
| 758  | 633.3215 | 1264.6284 | 1264.6155 | 10.2   | 0 | 5 | 0.35 | 1 | AGSVGAEACLMLK + Oxidation (M)                           |
| 236  | 471.7928 | 941.5710  | 941.5658  | 5.51   | 1 | 5 | 0.34 | 1 | KALLDLNR                                                |
| 235  | 471.7904 | 941.5662  | 941.5294  | 39.1   | 0 | 5 | 0.35 | 1 | NIVEAAAVR                                               |
| 761  | 634.3413 | 1266.6681 | 1266.6819 | -10.91 | 1 | 4 | 0.39 | 1 | QIPPLNLETKD                                             |
| 559  | 573.2925 | 1144.5705 | 1144.5724 | -1.61  | 1 | 4 | 0.54 | 1 | EGLQENKEAK                                              |
| 1041 | 490.9013 | 1469.6822 | 1469.6894 | -4.94  | 0 | 4 | 0.36 | 1 | LQVSEEFLECMK + Oxidation (M)                            |
| 492  | 553.2888 | 1104.5630 | 1104.5788 | -14.27 | 1 | 4 | 0.36 | 1 | RQYLQQR                                                 |
| 427  | 534.2583 | 1066.5021 | 1066.5090 | -6.49  | 1 | 4 | 0.37 | 1 | GDCPRAVGR                                               |
| 1150 | 785.9504 | 1569.8862 | 1569.8151 | 45.3   | 0 | 4 | 0.37 | 1 | VTLVFEHVDQDLR                                           |
| 111  | 414.2185 | 826.4225  | 826.4007  | 26.4   | 0 | 4 | 0.37 | 1 | TGMFSIR + Oxidation (M)                                 |
| 344  | 511.2742 | 1020.5338 | 1020.5577 | -23.42 | 1 | 4 | 0.38 | 1 | RTQPLNHR                                                |
| 35   | 375.2139 | 748.4133  | 748.4119  | 1.85   | 0 | 4 | 0.57 | 1 | FNEIVK                                                  |
| 428  | 534.3034 | 2133.1846 | 2133.1041 | 37.7   | 0 | 4 | 1.2  | 1 | EIGWMEGGQLVGNPAPIPR                                     |
| 1027 | 730.3837 | 2917.5056 | 2917.5367 | -10.65 | 1 | 4 | 0.75 | 1 | ALSVFPEMSEVIAAQLPKILAGMVK + Oxidation (M)               |
| 201  | 453.7375 | 905.4605  | 905.4719  | -12.57 | 0 | 4 | 0.56 | 1 | NFTAAVQR                                                |
| 362  | 515.7799 | 1029.5453 | 1029.5455 | -0.14  | 0 | 4 | 0.42 | 1 | EIQTVVGER                                               |
| 1151 | 524.3027 | 1569.8863 | 1569.8151 | 45.4   | 0 | 4 | 0.42 | 1 | VTLVFEHVDQDLR                                           |
| 31   | 374.2280 | 746.4415  | 746.4221  | 26.0   | 1 | 4 | 0.42 | 1 | VVMARR + Oxidation (M)                                  |
| 658  | 598.8216 | 1195.6287 | 1195.6349 | -5.24  | 1 | 4 | 0.42 | 1 | GNDSRFLPK                                               |
| 417  | 529.3106 | 1056.6066 | 1056.6543 | -45.08 | 1 | 4 | 0.43 | 1 | LGIKSKGLLK                                              |
| 578  | 578.8386 | 1155.6627 | 1155.6248 | 32.8   | 1 | 4 | 0.43 | 1 | QSPVDVLDKR                                              |
| 218  | 458.2619 | 1371.7639 | 1371.7796 | -11.44 | 1 | 4 | 0.84 | 1 | KCVILIVIGDDK + Carbamidomethyl (C)                      |
| 285  | 487.7646 | 973.5147  | 973.5379  | -23.79 | 1 | 3 | 0.76 | 1 | LLSKTCPR + Carbamidomethyl (C)                          |
| 32   | 374.2285 | 746.4424  | 746.4221  | 27.2   | 1 | 3 | 0.47 | 1 | VVMARR + Oxidation (M)                                  |
| 1117 | 511.9568 | 1532.8484 | 1532.8061 | 27.6   | 0 | 3 | 0.47 | 1 | QVVPFQVDCILFK                                           |
| 343  | 510.7769 | 1019.5392 | 1019.5148 | 24.0   | 1 | 3 | 0.47 | 1 | FSPEAASRR                                               |
| 647  | 596.8192 | 1191.6239 | 1191.6360 | -10.17 | 1 | 3 | 0.47 | 1 | RQQLQTYQR                                               |
| 454  | 541.8182 | 1081.6219 | 1081.6608 | -35.91 | 0 | 3 | 0.48 | 1 | VGQILLAVLNR                                             |
| 30   | 373.2437 | 744.4729  | 744.4494  | 31.6   | 0 | 3 | 0.48 | 1 | LLSSIGR                                                 |
| 686  | 408.2186 | 1221.6341 | 1221.6210 | 10.8   | 1 | 3 | 0.49 | 1 | KGSNVMLAVCK + Carbamidomethyl (C); Oxidation (M)        |
| 1564 | 738.0028 | 2210.9865 | 2211.0855 | -44.77 | 0 | 3 | 0.5  | 1 | YEAQAQGHMKPLSASQVSVR + Oxidation (M)                    |
| 1152 | 524.3027 | 1569.8863 | 1569.8151 | 45.4   | 0 | 3 | 0.5  | 1 | VTLVFEHVDQDLR                                           |
| 414  | 529.3096 | 1056.6046 | 1056.6543 | -46.98 | 1 | 3 | 0.51 | 1 | LGIKSKGLLK                                              |
| 894  | 452.9118 | 1355.7136 | 1355.7198 | -4.55  | 0 | 3 | 0.51 | 1 | FTIGPDAGPGVIR                                           |
| 577  | 386.2251 | 1155.6533 | 1155.6863 | -28.53 | 1 | 3 | 0.52 | 1 | ISEAKLTGIPK                                             |
| 1096 | 505.9263 | 1514.7570 | 1514.7399 | 11.3   | 0 | 3 | 0.52 | 1 | AEMSDAVSPINLPR + Oxidation (M)                          |
| 39   | 379.2438 | 756.4731  | 756.4857  | -16.74 | 1 | 3 | 0.55 | 1 | LLDLRK                                                  |
| 1648 | 654.0678 | 2612.2420 | 2612.2046 | 14.3   | 0 | 3 | 0.55 | 1 | SEFVLPSYFDQWIYSPMFNAR + Oxidation (M)                   |
| 150  | 428.7690 | 855.5235  | 855.4926  | 36.1   | 1 | 3 | 0.56 | 1 | LRISFDR                                                 |
| 272  | 483.2557 | 964.4968  | 964.5032  | -6.58  | 1 | 3 | 0.7  | 1 | GPRFRWR                                                 |
| 1353 | 589.3412 | 1765.0019 | 1764.9958 | 3.42   | 1 | 3 | 0.56 | 1 | GLRQAVLAIGQELNR                                         |
| 94   | 405.2227 | 808.4308  | 808.4265  | 5.34   | 1 | 3 | 0.56 | 1 | RMFDIK                                                  |
| 541  | 567.3184 | 1132.6222 | 1132.6492 | -23.87 | 0 | 2 | 0.57 | 1 | NIFVLDITAK                                              |
| 416  | 529.3105 | 1056.6065 | 1056.6543 | -45.22 | 1 | 2 | 0.58 | 1 | LGIKSKGLLK                                              |
| 81   | 400.2239 | 798.4333  | 798.4460  | -15.91 | 0 | 2 | 0.59 | 1 | RPGASVGR                                                |
| 989  | 714.3708 | 2853.4541 | 2853.4081 | 16.1   | 1 | 2 | 1.1  | 1 | EFVKMLPGDYPFETQISGGCELLPR + Oxidation (M)               |
| 1147 | 524.3021 | 1569.8846 | 1569.8151 | 44.2   | 0 | 2 | 0.61 | 1 | VTLVFEHVDQDLR                                           |
| 1352 | 589.3409 | 1765.0009 | 1764.9958 | 2.85   | 1 | 2 | 0.61 | 1 | GLRQAVLAIGQELNR                                         |
| 497  | 554.2760 | 2213.0748 | 2213.1804 | -47.74 | 1 | 2 | 1.5  | 1 | AGIAHLYGIAGTTNVTGDQVKK                                  |
| 97   | 408.2462 | 1628.9555 | 1628.9111 | 27.3   | 1 | 2 | 0.72 | 1 | SSSLPHVRLAQGLK                                          |
| 554  | 572.7952 | 1143.5759 | 1143.5594 | 14.5   | 0 | 2 | 0.63 | 1 | VTEMPSDLPR                                              |
| 695  | 613.8410 | 1225.6675 | 1225.6601 | 6.02   | 1 | 2 | 0.63 | 1 | EGKLMIGIHR + Oxidation (M)                              |
| 1675 | 564.8604 | 2819.2656 | 2819.3371 | -25.35 | 1 | 2 | 0.63 | 1 | NLNLDISKNNFLSMPETQWPCK + Carbamidomethyl (C)            |
| 266  | 481.2450 | 960.4754  | 960.4487  | 27.8   | 0 | 2 | 0.95 | 1 | DLPQWVR + Oxidation (M)                                 |
| 540  | 567.3159 | 1132.6172 | 1132.6492 | -28.26 | 0 | 2 | 0.66 | 1 | NIFVLDITAK                                              |
| 278  | 485.7534 | 969.4921  | 969.5244  | -33.22 | 0 | 2 | 0.64 | 1 | VVSDPGIR                                                |
| 994  | 362.2019 | 1444.7786 | 1444.7562 | 15.5   | 0 | 2 | 0.64 | 1 | SPELVAEVAIFDR                                           |
| 1134 | 782.3803 | 1562.7461 | 1562.7909 | -28.64 | 1 | 2 | 0.65 | 1 | VEQLSNMIVRSCK + Carbamidomethyl (C)                     |
| 303  | 495.2915 | 988.5684  | 988.5203  | 48.7   | 0 | 2 | 0.65 | 1 | VAQGHQPPR                                               |
| 374  | 519.2727 | 1036.5309 | 1036.5342 | -3.14  | 0 | 2 | 0.65 | 1 | TLGPFYPSR                                               |
| 1354 | 589.3413 | 1765.0021 | 1764.9958 | 3.53   | 1 | 2 | 0.67 | 1 | GLRQAVLAIGQELNR                                         |
| 217  | 458.2434 | 1828.9445 | 1828.9651 | -11.28 | 1 | 2 | 1.4  | 1 | KPTCAVRNQMETVKPK                                        |
| 155  | 432.7137 | 863.4129  | 863.4501  | -43.06 | 1 | 2 | 0.69 | 1 | IKDAFDR                                                 |
| 895  | 452.9124 | 1355.7152 | 1355.7198 | -3.36  | 0 | 2 | 0.69 | 1 | FTIGPDAGPGVIR                                           |
| 434  | 537.8057 | 1073.5967 | 1073.6485 | -48.17 | 0 | 2 | 1    | 1 | GIPYGVLTIK                                              |
| 10   | 357.2302 | 712.4459  | 712.4119  | 47.6   | 0 | 2 | 0.7  | 1 | GLIGPEK                                                 |
| 527  | 564.2897 | 1126.5648 | 1126.6207 | -49.59 | 1 | 1 | 0.76 | 1 | SQNIPTRVGR                                              |
| 253  | 477.3042 | 952.5938  | 952.5705  | 24.4   | 0 | 1 | 0.75 | 1 | LLEVLNPR                                                |
| 435  | 537.8057 | 1073.5968 | 1073.6485 | -48.12 | 0 | 1 | 1.1  | 1 | IPAYGVLTIK                                              |
| 431  | 537.7659 | 1073.5173 | 1073.4699 | 44.1   | 0 | 1 | 1.6  | 1 | QSEEPMMK                                                |
| 270  | 482.2320 | 1443.6741 | 1443.7180 | -30.42 | 0 | 1 | 1.4  | 1 | ITANSVYKLMGFR + Oxidation (M)                           |
| 1514 | 690.0050 | 2066.9930 | 2067.0282 | -17.00 | 0 | 1 | 0.78 | 1 | IAVNCFGHQHTIALMSYK + Carbamidomethyl (C); Oxidation (M) |
| 116  | 416.2500 | 830.4855  | 830.4610  | 29.6   | 0 | 1 | 0.9  | 1 | SQLSQLR                                                 |
| 1116 | 767.4297 | 1532.8448 | 1532.8061 | 25.3   | 0 | 1 | 0.82 | 1 | QVVPFQVDCILFK                                           |
| 47   | 382.2186 | 762.4227  | 762.4276  | -6.35  | 0 | 1 | 2    | 1 | LFENLK                                                  |
| 753  | 632.3315 | 1262.6483 | 1262.6507 | -1.82  | 0 | 1 | 0.84 | 1 | AEAGTGFLEQLK                                            |

|   |                      |          |           |           |        |   |   |      |   |                                                               |
|---|----------------------|----------|-----------|-----------|--------|---|---|------|---|---------------------------------------------------------------|
| ✓ | <a href="#">1602</a> | 786.0410 | 2355.1011 | 2355.0844 | 7.10   | 0 | 1 | 0.8  | 1 | TITPCISSPCAPAAPCTPCVPR + 3 Carbamidomethyl (C)                |
| ✓ | <a href="#">488</a>  | 552.7692 | 1103.5238 | 1103.5094 | 13.1   | 1 | 1 | 1    | 1 | GGEGAEAEKK                                                    |
| ✓ | <a href="#">529</a>  | 565.3107 | 1128.6067 | 1128.6502 | -38.52 | 1 | 1 | 0.81 | 1 | LEARLSALEK                                                    |
| ✓ | <a href="#">3</a>    | 350.7332 | 699.4518  | 699.4391  | 18.2   | 1 | 1 | 0.81 | 1 | RIANVK                                                        |
| ✓ | <a href="#">1195</a> | 413.2566 | 1648.9973 | 1648.9624 | 21.2   | 1 | 1 | 0.81 | 1 | KVINALSGIDLTLR                                                |
| ✓ | <a href="#">205</a>  | 454.7270 | 907.4394  | 907.4069  | 35.8   | 0 | 1 | 1    | 1 | TCSVNEAK + Carbamidomethyl (C)                                |
| ✓ | <a href="#">76</a>   | 396.2267 | 1580.8779 | 1580.8463 | 20.0   | 1 | 1 | 1.8  | 1 | HPEDRKPVLWIK                                                  |
| ✓ | <a href="#">806</a>  | 648.3163 | 1294.6180 | 1294.5944 | 18.2   | 1 | 1 | 0.82 | 1 | KCCQAGMVLGGR + Carbamidomethyl (C); Oxidation (M)             |
| ✓ | <a href="#">1441</a> | 653.0013 | 1955.9820 | 1956.0251 | -22.02 | 0 | 1 | 0.83 | 1 | LAALCLADNSVALHYGGLR                                           |
| ✓ | <a href="#">146</a>  | 428.7652 | 855.5159  | 855.5542  | -44.74 | 1 | 1 | 0.83 | 1 | IDVILRK                                                       |
| ✓ | <a href="#">252</a>  | 477.3041 | 952.5936  | 952.5705  | 24.2   | 0 | 1 | 0.83 | 1 | LLEVLNPR                                                      |
| ✓ | <a href="#">1102</a> | 760.8853 | 1519.7560 | 1519.7705 | -9.53  | 0 | 1 | 0.84 | 1 | MVVVSDHYLQSK + Oxidation (M)                                  |
| ✓ | <a href="#">1678</a> | 979.4890 | 2935.4453 | 2935.4064 | 13.2   | 1 | 1 | 0.84 | 1 | SLEKVKPGMCMCSVAGWQLGVNMPADS + Oxidation (M)                   |
| ✓ | <a href="#">220</a>  | 459.2472 | 1832.9597 | 1832.9091 | 27.6   | 1 | 1 | 3.9  | 1 | VLNFSNGMKHLDDLK + Oxidation (M)                               |
| ✓ | <a href="#">1647</a> | 654.0668 | 2612.2382 | 2612.2046 | 12.9   | 0 | 1 | 0.84 | 1 | SEFVLPSPYFDQWIYSPFNAR + Oxidation (M)                         |
| ✓ | <a href="#">779</a>  | 643.7832 | 1285.5518 | 1285.5543 | -1.98  | 0 | 1 | 0.86 | 1 | LHDCCLSHSK + Carbamidomethyl (C)                              |
| ✓ | <a href="#">1685</a> | 804.6562 | 3214.5955 | 3214.6982 | -31.93 | 0 | 0 | 0.89 | 1 | SMVVADNGELLSGGVPGIVALFVLECIIR + Oxidation (M)                 |
| ✓ | <a href="#">1671</a> | 924.1459 | 2769.4160 | 2769.2981 | 42.6   | 1 | 0 | 0.92 | 1 | AEDGSVIDYELIDQDARDLYDAGVK                                     |
| ✓ | <a href="#">485</a>  | 552.3132 | 1102.6118 | 1102.5805 | 28.4   | 0 | 0 | 1.2  | 1 | INDMAGITIR                                                    |
| ✓ | <a href="#">147</a>  | 428.7654 | 855.5163  | 855.5542  | -44.30 | 1 | 0 | 0.92 | 1 | IDVILRK                                                       |
| ✓ | <a href="#">227</a>  | 465.2215 | 928.4285  | 928.4614  | -35.42 | 0 | 0 | 0.93 | 1 | ENDPSVLR                                                      |
| ✓ | <a href="#">1674</a> | 697.0620 | 2784.2187 | 2784.3325 | -40.88 | 1 | 0 | 0.93 | 1 | SFAGIRFGCFMPLSLDSDLTMYLK + Carbamidomethyl (C); Oxidation (M) |
| ✓ | <a href="#">534</a>  | 566.3138 | 1130.6131 | 1130.5680 | 39.9   | 0 | 0 | 0.95 | 1 | LGNATIESGR                                                    |
| ✓ | <a href="#">1673</a> | 924.1471 | 2769.4194 | 2769.2981 | 43.8   | 1 | 0 | 0.95 | 1 | AEDGSVIDYELIDQDARDLYDAGVK                                     |
| ✓ | <a href="#">896</a>  | 452.9124 | 1355.7155 | 1355.7198 | -3.13  | 0 | 0 | 0.96 | 1 | GFTIGPDAGPGVIR                                                |
| ✓ | <a href="#">1484</a> | 507.9833 | 2027.9040 | 2027.9808 | -37.89 | 1 | 0 | 0.96 | 1 | FAEQTFKDEIRPMEK + Carbamidomethyl (C); Oxidation (M)          |
| ✓ | <a href="#">251</a>  | 477.3040 | 952.5934  | 952.5705  | 24.0   | 0 | 0 | 0.97 | 1 | LLEVLNPR                                                      |
| ✓ | <a href="#">1636</a> | 845.7285 | 2534.1636 | 2534.1320 | 12.5   | 0 | 0 | 0.97 | 1 | VMPISGDYVQGFMSYVVPYYR + 2 Oxidation (M)                       |
| ✓ | <a href="#">1252</a> | 562.2678 | 1683.7815 | 1683.8324 | -30.25 | 1 | 0 | 0.98 | 1 | LGNVYLNLIKMSCEK + Carbamidomethyl (C); Oxidation (M)          |
| ✓ | <a href="#">185</a>  | 448.7394 | 895.4642  | 895.4399  | 27.1   | 0 | 0 | 0.98 | 1 | IETNYTR                                                       |
| ✓ | <a href="#">34</a>   | 375.2126 | 748.4107  | 748.4344  | -31.61 | 1 | 0 | 3.2  | 1 | RISAFR                                                        |
| ✓ | <a href="#">1</a>    | 350.0632 | 698.1118  |           |        |   |   |      |   |                                                               |
| ✓ | <a href="#">2</a>    | 350.7323 | 699.4500  |           |        |   |   |      |   |                                                               |
| ✓ | <a href="#">4</a>    | 350.7333 | 699.4519  |           |        |   |   |      |   |                                                               |
| ✓ | <a href="#">5</a>    | 350.7333 | 699.4520  |           |        |   |   |      |   |                                                               |
| ✓ | <a href="#">7</a>    | 353.2089 | 704.4032  |           |        |   |   |      |   |                                                               |
| ✓ | <a href="#">9</a>    | 357.1881 | 712.3616  |           |        |   |   |      |   |                                                               |
| ✓ | <a href="#">11</a>   | 357.2303 | 712.4460  |           |        |   |   |      |   |                                                               |
| ✓ | <a href="#">12</a>   | 357.2304 | 712.4462  |           |        |   |   |      |   |                                                               |
| ✓ | <a href="#">13</a>   | 359.3136 | 716.6126  |           |        |   |   |      |   |                                                               |
| ✓ | <a href="#">14</a>   | 359.3145 | 716.6144  |           |        |   |   |      |   |                                                               |
| ✓ | <a href="#">15</a>   | 359.3150 | 716.6155  |           |        |   |   |      |   |                                                               |
| ✓ | <a href="#">16</a>   | 362.0946 | 722.1746  |           |        |   |   |      |   |                                                               |
| ✓ | <a href="#">17</a>   | 362.0953 | 722.1761  |           |        |   |   |      |   |                                                               |
| ✓ | <a href="#">18</a>   | 362.1170 | 722.2194  |           |        |   |   |      |   |                                                               |
| ✓ | <a href="#">19</a>   | 363.0920 | 724.1695  |           |        |   |   |      |   |                                                               |
| ✓ | <a href="#">20</a>   | 364.2109 | 726.4072  |           |        |   |   |      |   |                                                               |
| ✓ | <a href="#">21</a>   | 364.2254 | 726.4362  |           |        |   |   |      |   |                                                               |
| ✓ | <a href="#">22</a>   | 364.2254 | 726.4362  |           |        |   |   |      |   |                                                               |
| ✓ | <a href="#">24</a>   | 365.2277 | 728.4409  |           |        |   |   |      |   |                                                               |
| ✓ | <a href="#">27</a>   | 369.2125 | 736.4104  |           |        |   |   |      |   |                                                               |
| ✓ | <a href="#">28</a>   | 371.6801 | 741.3456  |           |        |   |   |      |   |                                                               |
| ✓ | <a href="#">29</a>   | 371.7315 | 741.4485  |           |        |   |   |      |   |                                                               |
| ✓ | <a href="#">33</a>   | 374.7167 | 747.4188  |           |        |   |   |      |   |                                                               |
| ✓ | <a href="#">37</a>   | 376.2073 | 750.4001  |           |        |   |   |      |   |                                                               |
| ✓ | <a href="#">42</a>   | 380.7908 | 759.5670  |           |        |   |   |      |   |                                                               |
| ✓ | <a href="#">43</a>   | 381.2301 | 760.4457  |           |        |   |   |      |   |                                                               |
| ✓ | <a href="#">50</a>   | 383.8720 | 765.7295  |           |        |   |   |      |   |                                                               |
| ✓ | <a href="#">51</a>   | 384.2348 | 766.4550  |           |        |   |   |      |   |                                                               |
| ✓ | <a href="#">52</a>   | 385.7413 | 769.4681  |           |        |   |   |      |   |                                                               |
| ✓ | <a href="#">53</a>   | 387.7152 | 773.4159  |           |        |   |   |      |   |                                                               |
| ✓ | <a href="#">55</a>   | 390.6997 | 779.3849  |           |        |   |   |      |   |                                                               |
| ✓ | <a href="#">56</a>   | 390.8137 | 779.6129  |           |        |   |   |      |   |                                                               |
| ✓ | <a href="#">57</a>   | 391.2817 | 780.5489  |           |        |   |   |      |   |                                                               |
| ✓ | <a href="#">58</a>   | 391.2819 | 780.5492  |           |        |   |   |      |   |                                                               |
| ✓ | <a href="#">59</a>   | 391.2819 | 780.5493  |           |        |   |   |      |   |                                                               |
| ✓ | <a href="#">60</a>   | 391.2821 | 780.5496  |           |        |   |   |      |   |                                                               |
| ✓ | <a href="#">61</a>   | 391.2822 | 780.5498  |           |        |   |   |      |   |                                                               |
| ✓ | <a href="#">62</a>   | 391.2823 | 780.5501  |           |        |   |   |      |   |                                                               |
| ✓ | <a href="#">63</a>   | 391.2824 | 780.5502  |           |        |   |   |      |   |                                                               |
| ✓ | <a href="#">64</a>   | 391.2825 | 780.5504  |           |        |   |   |      |   |                                                               |
| ✓ | <a href="#">65</a>   | 391.2825 | 780.5505  |           |        |   |   |      |   |                                                               |
| ✓ | <a href="#">66</a>   | 391.2826 | 780.5506  |           |        |   |   |      |   |                                                               |
| ✓ | <a href="#">67</a>   | 391.2828 | 780.5510  |           |        |   |   |      |   |                                                               |
| ✓ | <a href="#">68</a>   | 391.2833 | 780.5521  |           |        |   |   |      |   |                                                               |
| ✓ | <a href="#">69</a>   | 391.2833 | 780.5521  |           |        |   |   |      |   |                                                               |
| ✓ | <a href="#">70</a>   | 391.2834 | 780.5523  |           |        |   |   |      |   |                                                               |
| ✓ | <a href="#">71</a>   | 391.2835 | 780.5525  |           |        |   |   |      |   |                                                               |
| ✓ | <a href="#">72</a>   | 391.2837 | 780.5529  |           |        |   |   |      |   |                                                               |
| ✓ | <a href="#">73</a>   | 391.2847 | 780.5549  |           |        |   |   |      |   |                                                               |
| ✓ | <a href="#">77</a>   | 397.9761 | 793.9376  |           |        |   |   |      |   |                                                               |
| ✓ | <a href="#">85</a>   | 402.0591 | 802.1036  |           |        |   |   |      |   |                                                               |
| ✓ | <a href="#">87</a>   | 403.2314 | 804.4482  |           |        |   |   |      |   |                                                               |
| ✓ | <a href="#">88</a>   | 403.2314 | 804.4483  |           |        |   |   |      |   |                                                               |
| ✓ | <a href="#">89</a>   | 403.2314 | 804.4483  |           |        |   |   |      |   |                                                               |
| ✓ | <a href="#">93</a>   | 405.2227 | 808.4308  |           |        |   |   |      |   |                                                               |
| ✓ | <a href="#">95</a>   | 405.2251 | 808.4355  |           |        |   |   |      |   |                                                               |
| ✓ | <a href="#">96</a>   | 406.2489 | 810.4832  |           |        |   |   |      |   |                                                               |
| ✓ | <a href="#">98</a>   | 408.7389 | 815.4633  |           |        |   |   |      |   |                                                               |
| ✓ | <a href="#">99</a>   | 409.7407 | 817.4668  |           |        |   |   |      |   |                                                               |
| ✓ | <a href="#">100</a>  | 409.7413 | 817.4681  |           |        |   |   |      |   |                                                               |
| ✓ | <a href="#">103</a>  | 412.2394 | 822.4643  |           |        |   |   |      |   |                                                               |
| ✓ | <a href="#">104</a>  | 412.7520 | 823.4895  |           |        |   |   |      |   |                                                               |
| ✓ | <a href="#">105</a>  | 412.7521 | 823.4896  |           |        |   |   |      |   |                                                               |



|                                     |                     |          |          |
|-------------------------------------|---------------------|----------|----------|
| <input checked="" type="checkbox"/> | <a href="#">106</a> | 412.7524 | 823.4902 |
| <input checked="" type="checkbox"/> | <a href="#">107</a> | 413.2444 | 824.4741 |
| <input checked="" type="checkbox"/> | <a href="#">108</a> | 414.2059 | 826.3972 |
| <input checked="" type="checkbox"/> | <a href="#">109</a> | 414.2182 | 826.4218 |
| <input checked="" type="checkbox"/> | <a href="#">112</a> | 414.8723 | 827.7299 |
| <input checked="" type="checkbox"/> | <a href="#">113</a> | 414.8739 | 827.7332 |
| <input checked="" type="checkbox"/> | <a href="#">114</a> | 415.7393 | 829.4639 |
| <input checked="" type="checkbox"/> | <a href="#">118</a> | 416.2520 | 830.4894 |
| <input checked="" type="checkbox"/> | <a href="#">119</a> | 416.7507 | 831.4868 |
| <input checked="" type="checkbox"/> | <a href="#">120</a> | 416.7519 | 831.4893 |
| <input checked="" type="checkbox"/> | <a href="#">121</a> | 418.2195 | 834.4244 |
| <input checked="" type="checkbox"/> | <a href="#">122</a> | 418.2208 | 834.4270 |
| <input checked="" type="checkbox"/> | <a href="#">123</a> | 419.7577 | 837.5009 |
| <input checked="" type="checkbox"/> | <a href="#">124</a> | 420.2284 | 838.4423 |
| <input checked="" type="checkbox"/> | <a href="#">125</a> | 421.7575 | 841.5005 |
| <input checked="" type="checkbox"/> | <a href="#">126</a> | 421.7576 | 841.5006 |
| <input checked="" type="checkbox"/> | <a href="#">127</a> | 421.7577 | 841.5008 |
| <input checked="" type="checkbox"/> | <a href="#">128</a> | 421.7578 | 841.5010 |
| <input checked="" type="checkbox"/> | <a href="#">129</a> | 421.7580 | 841.5014 |
| <input checked="" type="checkbox"/> | <a href="#">130</a> | 421.7581 | 841.5016 |
| <input checked="" type="checkbox"/> | <a href="#">131</a> | 421.7581 | 841.5016 |
| <input checked="" type="checkbox"/> | <a href="#">132</a> | 422.7603 | 843.5061 |
| <input checked="" type="checkbox"/> | <a href="#">133</a> | 423.2382 | 844.4619 |
| <input checked="" type="checkbox"/> | <a href="#">135</a> | 424.7336 | 847.4526 |
| <input checked="" type="checkbox"/> | <a href="#">136</a> | 424.7340 | 847.4534 |
| <input checked="" type="checkbox"/> | <a href="#">141</a> | 426.2168 | 850.4191 |
| <input checked="" type="checkbox"/> | <a href="#">143</a> | 427.2252 | 852.4358 |
| <input checked="" type="checkbox"/> | <a href="#">144</a> | 428.2616 | 854.5086 |
| <input checked="" type="checkbox"/> | <a href="#">145</a> | 428.7593 | 855.5040 |
| <input checked="" type="checkbox"/> | <a href="#">148</a> | 428.7655 | 855.5164 |
| <input checked="" type="checkbox"/> | <a href="#">149</a> | 428.7656 | 855.5166 |
| <input checked="" type="checkbox"/> | <a href="#">157</a> | 433.2240 | 864.4334 |
| <input checked="" type="checkbox"/> | <a href="#">158</a> | 433.2240 | 864.4334 |
| <input checked="" type="checkbox"/> | <a href="#">159</a> | 433.2243 | 864.4340 |
| <input checked="" type="checkbox"/> | <a href="#">160</a> | 434.7117 | 867.4089 |
| <input checked="" type="checkbox"/> | <a href="#">162</a> | 435.7704 | 869.5262 |
| <input checked="" type="checkbox"/> | <a href="#">163</a> | 435.7716 | 869.5286 |
| <input checked="" type="checkbox"/> | <a href="#">164</a> | 435.7732 | 869.5318 |
| <input checked="" type="checkbox"/> | <a href="#">165</a> | 435.7736 | 869.5327 |
| <input checked="" type="checkbox"/> | <a href="#">166</a> | 435.7737 | 869.5328 |
| <input checked="" type="checkbox"/> | <a href="#">167</a> | 435.7737 | 869.5328 |
| <input checked="" type="checkbox"/> | <a href="#">169</a> | 437.2561 | 872.4977 |
| <input checked="" type="checkbox"/> | <a href="#">170</a> | 437.7514 | 873.4882 |
| <input checked="" type="checkbox"/> | <a href="#">172</a> | 438.7637 | 875.5128 |
| <input checked="" type="checkbox"/> | <a href="#">173</a> | 441.2729 | 880.5312 |
| <input checked="" type="checkbox"/> | <a href="#">174</a> | 441.7542 | 881.4938 |
| <input checked="" type="checkbox"/> | <a href="#">175</a> | 445.7499 | 889.4852 |
| <input checked="" type="checkbox"/> | <a href="#">176</a> | 445.7514 | 889.4882 |
| <input checked="" type="checkbox"/> | <a href="#">177</a> | 445.7603 | 889.5061 |
| <input checked="" type="checkbox"/> | <a href="#">178</a> | 446.2155 | 890.4164 |
| <input checked="" type="checkbox"/> | <a href="#">179</a> | 446.7521 | 891.4897 |
| <input checked="" type="checkbox"/> | <a href="#">180</a> | 447.7187 | 893.4228 |
| <input checked="" type="checkbox"/> | <a href="#">181</a> | 447.7190 | 893.4234 |
| <input checked="" type="checkbox"/> | <a href="#">182</a> | 448.2126 | 894.4106 |
| <input checked="" type="checkbox"/> | <a href="#">183</a> | 448.2131 | 894.4116 |
| <input checked="" type="checkbox"/> | <a href="#">184</a> | 448.7393 | 895.4640 |
| <input checked="" type="checkbox"/> | <a href="#">186</a> | 449.2391 | 896.4636 |
| <input checked="" type="checkbox"/> | <a href="#">187</a> | 449.2443 | 896.4740 |
| <input checked="" type="checkbox"/> | <a href="#">188</a> | 449.2445 | 896.4745 |
| <input checked="" type="checkbox"/> | <a href="#">189</a> | 449.7572 | 897.4998 |
| <input checked="" type="checkbox"/> | <a href="#">190</a> | 450.2683 | 898.5220 |
| <input checked="" type="checkbox"/> | <a href="#">191</a> | 450.2685 | 898.5225 |
| <input checked="" type="checkbox"/> | <a href="#">192</a> | 450.2984 | 898.5823 |
| <input checked="" type="checkbox"/> | <a href="#">193</a> | 450.2985 | 898.5825 |
| <input checked="" type="checkbox"/> | <a href="#">194</a> | 450.2985 | 898.5825 |
| <input checked="" type="checkbox"/> | <a href="#">195</a> | 451.2523 | 900.4900 |
| <input checked="" type="checkbox"/> | <a href="#">196</a> | 451.2545 | 900.4944 |
| <input checked="" type="checkbox"/> | <a href="#">198</a> | 452.2605 | 902.5065 |
| <input checked="" type="checkbox"/> | <a href="#">199</a> | 453.2453 | 904.4761 |
| <input checked="" type="checkbox"/> | <a href="#">202</a> | 453.7835 | 905.5524 |
| <input checked="" type="checkbox"/> | <a href="#">206</a> | 454.7497 | 907.4849 |
| <input checked="" type="checkbox"/> | <a href="#">209</a> | 457.2076 | 912.4006 |
| <input checked="" type="checkbox"/> | <a href="#">210</a> | 457.2583 | 912.5020 |
| <input checked="" type="checkbox"/> | <a href="#">211</a> | 457.2588 | 912.5031 |
| <input checked="" type="checkbox"/> | <a href="#">212</a> | 457.2763 | 912.5381 |
| <input checked="" type="checkbox"/> | <a href="#">213</a> | 457.2764 | 912.5383 |
| <input checked="" type="checkbox"/> | <a href="#">215</a> | 457.7859 | 913.5573 |
| <input checked="" type="checkbox"/> | <a href="#">216</a> | 457.9154 | 913.8163 |
| <input checked="" type="checkbox"/> | <a href="#">219</a> | 459.2400 | 916.4654 |
| <input checked="" type="checkbox"/> | <a href="#">221</a> | 459.2786 | 916.5426 |
| <input checked="" type="checkbox"/> | <a href="#">222</a> | 459.9111 | 917.8077 |
| <input checked="" type="checkbox"/> | <a href="#">223</a> | 460.7568 | 919.4990 |
| <input checked="" type="checkbox"/> | <a href="#">224</a> | 460.7569 | 919.4992 |
| <input checked="" type="checkbox"/> | <a href="#">225</a> | 461.7344 | 921.4543 |
| <input checked="" type="checkbox"/> | <a href="#">226</a> | 461.7345 | 921.4545 |
| <input checked="" type="checkbox"/> | <a href="#">229</a> | 465.2851 | 928.5557 |
| <input checked="" type="checkbox"/> | <a href="#">230</a> | 465.2859 | 928.5572 |
| <input checked="" type="checkbox"/> | <a href="#">231</a> | 468.2440 | 934.4734 |
| <input checked="" type="checkbox"/> | <a href="#">232</a> | 469.7606 | 937.5065 |
| <input checked="" type="checkbox"/> | <a href="#">233</a> | 471.7846 | 941.5547 |
| <input checked="" type="checkbox"/> | <a href="#">234</a> | 471.7863 | 941.5580 |
| <input checked="" type="checkbox"/> | <a href="#">237</a> | 471.7930 | 941.5714 |
| <input checked="" type="checkbox"/> | <a href="#">238</a> | 472.2583 | 942.5021 |
| <input checked="" type="checkbox"/> | <a href="#">239</a> | 472.2584 | 942.5022 |



|                                     |                     |          |           |
|-------------------------------------|---------------------|----------|-----------|
| <input checked="" type="checkbox"/> | <a href="#">240</a> | 472.2598 | 942.5051  |
| <input checked="" type="checkbox"/> | <a href="#">241</a> | 472.2873 | 942.5600  |
| <input checked="" type="checkbox"/> | <a href="#">245</a> | 473.2787 | 944.5429  |
| <input checked="" type="checkbox"/> | <a href="#">246</a> | 474.1328 | 946.2510  |
| <input checked="" type="checkbox"/> | <a href="#">247</a> | 475.2585 | 948.5024  |
| <input checked="" type="checkbox"/> | <a href="#">250</a> | 476.2321 | 950.4497  |
| <input checked="" type="checkbox"/> | <a href="#">254</a> | 478.8087 | 955.6028  |
| <input checked="" type="checkbox"/> | <a href="#">255</a> | 478.8101 | 955.6056  |
| <input checked="" type="checkbox"/> | <a href="#">256</a> | 479.2865 | 956.5584  |
| <input checked="" type="checkbox"/> | <a href="#">257</a> | 479.2887 | 956.5628  |
| <input checked="" type="checkbox"/> | <a href="#">258</a> | 479.2887 | 956.5629  |
| <input checked="" type="checkbox"/> | <a href="#">259</a> | 479.2890 | 956.5634  |
| <input checked="" type="checkbox"/> | <a href="#">260</a> | 479.2891 | 956.5637  |
| <input checked="" type="checkbox"/> | <a href="#">261</a> | 479.2892 | 956.5639  |
| <input checked="" type="checkbox"/> | <a href="#">262</a> | 479.2894 | 956.5642  |
| <input checked="" type="checkbox"/> | <a href="#">263</a> | 479.2895 | 956.5645  |
| <input checked="" type="checkbox"/> | <a href="#">264</a> | 479.2899 | 956.5653  |
| <input checked="" type="checkbox"/> | <a href="#">265</a> | 479.7647 | 957.5149  |
| <input checked="" type="checkbox"/> | <a href="#">267</a> | 481.2452 | 960.4757  |
| <input checked="" type="checkbox"/> | <a href="#">268</a> | 481.2453 | 960.4760  |
| <input checked="" type="checkbox"/> | <a href="#">269</a> | 482.2298 | 962.4450  |
| <input checked="" type="checkbox"/> | <a href="#">271</a> | 482.2476 | 962.4806  |
| <input checked="" type="checkbox"/> | <a href="#">273</a> | 483.2558 | 964.4971  |
| <input checked="" type="checkbox"/> | <a href="#">274</a> | 483.2564 | 964.4981  |
| <input checked="" type="checkbox"/> | <a href="#">275</a> | 483.7832 | 965.5519  |
| <input checked="" type="checkbox"/> | <a href="#">276</a> | 483.7860 | 965.5575  |
| <input checked="" type="checkbox"/> | <a href="#">277</a> | 484.7509 | 967.4873  |
| <input checked="" type="checkbox"/> | <a href="#">280</a> | 486.2976 | 970.5806  |
| <input checked="" type="checkbox"/> | <a href="#">281</a> | 487.2744 | 972.5342  |
| <input checked="" type="checkbox"/> | <a href="#">282</a> | 487.2745 | 972.5345  |
| <input checked="" type="checkbox"/> | <a href="#">283</a> | 487.2746 | 972.5346  |
| <input checked="" type="checkbox"/> | <a href="#">284</a> | 487.2746 | 972.5346  |
| <input checked="" type="checkbox"/> | <a href="#">286</a> | 488.2783 | 974.5420  |
| <input checked="" type="checkbox"/> | <a href="#">287</a> | 488.2795 | 974.5444  |
| <input checked="" type="checkbox"/> | <a href="#">288</a> | 489.2534 | 976.4922  |
| <input checked="" type="checkbox"/> | <a href="#">296</a> | 493.2855 | 984.5565  |
| <input checked="" type="checkbox"/> | <a href="#">297</a> | 493.7623 | 985.5101  |
| <input checked="" type="checkbox"/> | <a href="#">298</a> | 494.3008 | 986.5871  |
| <input checked="" type="checkbox"/> | <a href="#">299</a> | 495.2681 | 988.5216  |
| <input checked="" type="checkbox"/> | <a href="#">301</a> | 495.2835 | 988.5525  |
| <input checked="" type="checkbox"/> | <a href="#">302</a> | 495.2836 | 988.5526  |
| <input checked="" type="checkbox"/> | <a href="#">304</a> | 495.2915 | 988.5684  |
| <input checked="" type="checkbox"/> | <a href="#">305</a> | 495.2915 | 988.5685  |
| <input checked="" type="checkbox"/> | <a href="#">306</a> | 495.2916 | 988.5687  |
| <input checked="" type="checkbox"/> | <a href="#">307</a> | 497.2517 | 992.4888  |
| <input checked="" type="checkbox"/> | <a href="#">308</a> | 497.2523 | 992.4899  |
| <input checked="" type="checkbox"/> | <a href="#">309</a> | 497.2536 | 992.4927  |
| <input checked="" type="checkbox"/> | <a href="#">310</a> | 497.2538 | 992.4929  |
| <input checked="" type="checkbox"/> | <a href="#">311</a> | 497.2539 | 992.4932  |
| <input checked="" type="checkbox"/> | <a href="#">312</a> | 497.2544 | 992.4943  |
| <input checked="" type="checkbox"/> | <a href="#">314</a> | 498.2167 | 994.4188  |
| <input checked="" type="checkbox"/> | <a href="#">315</a> | 499.2746 | 996.5347  |
| <input checked="" type="checkbox"/> | <a href="#">316</a> | 499.2756 | 996.5367  |
| <input checked="" type="checkbox"/> | <a href="#">317</a> | 499.7625 | 997.5104  |
| <input checked="" type="checkbox"/> | <a href="#">318</a> | 499.8002 | 997.5858  |
| <input checked="" type="checkbox"/> | <a href="#">319</a> | 499.8012 | 997.5878  |
| <input checked="" type="checkbox"/> | <a href="#">320</a> | 499.8034 | 997.5923  |
| <input checked="" type="checkbox"/> | <a href="#">321</a> | 499.8042 | 997.5938  |
| <input checked="" type="checkbox"/> | <a href="#">322</a> | 499.8043 | 997.5941  |
| <input checked="" type="checkbox"/> | <a href="#">323</a> | 500.7522 | 999.4898  |
| <input checked="" type="checkbox"/> | <a href="#">324</a> | 500.7524 | 999.4902  |
| <input checked="" type="checkbox"/> | <a href="#">325</a> | 500.7684 | 999.5222  |
| <input checked="" type="checkbox"/> | <a href="#">326</a> | 500.7717 | 999.5288  |
| <input checked="" type="checkbox"/> | <a href="#">327</a> | 500.7748 | 999.5351  |
| <input checked="" type="checkbox"/> | <a href="#">328</a> | 500.7753 | 999.5360  |
| <input checked="" type="checkbox"/> | <a href="#">329</a> | 501.7626 | 1001.5106 |
| <input checked="" type="checkbox"/> | <a href="#">330</a> | 501.9303 | 1001.8461 |
| <input checked="" type="checkbox"/> | <a href="#">331</a> | 505.2434 | 1008.4723 |
| <input checked="" type="checkbox"/> | <a href="#">332</a> | 505.2690 | 1008.5234 |
| <input checked="" type="checkbox"/> | <a href="#">333</a> | 505.2698 | 1008.5250 |
| <input checked="" type="checkbox"/> | <a href="#">335</a> | 507.2659 | 1012.5173 |
| <input checked="" type="checkbox"/> | <a href="#">336</a> | 507.3014 | 1012.5882 |
| <input checked="" type="checkbox"/> | <a href="#">337</a> | 507.3024 | 1012.5903 |
| <input checked="" type="checkbox"/> | <a href="#">338</a> | 507.7992 | 1013.5838 |
| <input checked="" type="checkbox"/> | <a href="#">339</a> | 507.7994 | 1013.5842 |
| <input checked="" type="checkbox"/> | <a href="#">340</a> | 508.7919 | 1015.5692 |
| <input checked="" type="checkbox"/> | <a href="#">341</a> | 510.2603 | 1018.5061 |
| <input checked="" type="checkbox"/> | <a href="#">342</a> | 510.2604 | 1018.5061 |
| <input checked="" type="checkbox"/> | <a href="#">346</a> | 511.7664 | 1021.5183 |
| <input checked="" type="checkbox"/> | <a href="#">347</a> | 511.7666 | 1021.5186 |
| <input checked="" type="checkbox"/> | <a href="#">348</a> | 512.7740 | 1023.5333 |
| <input checked="" type="checkbox"/> | <a href="#">349</a> | 512.7740 | 1023.5335 |
| <input checked="" type="checkbox"/> | <a href="#">350</a> | 513.2840 | 1024.5535 |
| <input checked="" type="checkbox"/> | <a href="#">351</a> | 513.2840 | 1024.5535 |
| <input checked="" type="checkbox"/> | <a href="#">352</a> | 513.3082 | 1024.6018 |
| <input checked="" type="checkbox"/> | <a href="#">353</a> | 513.3084 | 1024.6022 |
| <input checked="" type="checkbox"/> | <a href="#">354</a> | 513.3085 | 1024.6024 |
| <input checked="" type="checkbox"/> | <a href="#">355</a> | 513.3086 | 1024.6026 |
| <input checked="" type="checkbox"/> | <a href="#">356</a> | 513.7640 | 1025.5135 |
| <input checked="" type="checkbox"/> | <a href="#">357</a> | 515.2999 | 1028.5853 |
| <input checked="" type="checkbox"/> | <a href="#">358</a> | 515.2999 | 1028.5853 |
| <input checked="" type="checkbox"/> | <a href="#">359</a> | 515.7402 | 1029.4659 |
| <input checked="" type="checkbox"/> | <a href="#">360</a> | 515.7406 | 1029.4666 |
| <input checked="" type="checkbox"/> | <a href="#">361</a> | 515.7421 | 1029.4696 |

|                                     |                     |          |           |
|-------------------------------------|---------------------|----------|-----------|
| <input checked="" type="checkbox"/> | <a href="#">363</a> | 515.7800 | 1029.5455 |
| <input checked="" type="checkbox"/> | <a href="#">364</a> | 515.7835 | 1029.5524 |
| <input checked="" type="checkbox"/> | <a href="#">368</a> | 516.3125 | 1030.6105 |
| <input checked="" type="checkbox"/> | <a href="#">369</a> | 517.7923 | 1033.5700 |
| <input checked="" type="checkbox"/> | <a href="#">370</a> | 518.1306 | 1034.2466 |
| <input checked="" type="checkbox"/> | <a href="#">371</a> | 518.7733 | 1035.5321 |
| <input checked="" type="checkbox"/> | <a href="#">372</a> | 518.7735 | 1035.5325 |
| <input checked="" type="checkbox"/> | <a href="#">373</a> | 519.2709 | 1036.5273 |
| <input checked="" type="checkbox"/> | <a href="#">375</a> | 519.7671 | 1037.5196 |
| <input checked="" type="checkbox"/> | <a href="#">376</a> | 520.2990 | 1038.5835 |
| <input checked="" type="checkbox"/> | <a href="#">377</a> | 520.2996 | 1038.5846 |
| <input checked="" type="checkbox"/> | <a href="#">378</a> | 520.8262 | 1039.6378 |
| <input checked="" type="checkbox"/> | <a href="#">379</a> | 520.8264 | 1039.6383 |
| <input checked="" type="checkbox"/> | <a href="#">380</a> | 521.7246 | 1041.4347 |
| <input checked="" type="checkbox"/> | <a href="#">381</a> | 521.7970 | 1041.5794 |
| <input checked="" type="checkbox"/> | <a href="#">382</a> | 521.7972 | 1041.5798 |
| <input checked="" type="checkbox"/> | <a href="#">383</a> | 521.7972 | 1041.5799 |
| <input checked="" type="checkbox"/> | <a href="#">384</a> | 521.7973 | 1041.5800 |
| <input checked="" type="checkbox"/> | <a href="#">386</a> | 522.2735 | 1042.5325 |
| <input checked="" type="checkbox"/> | <a href="#">388</a> | 522.2936 | 1042.5726 |
| <input checked="" type="checkbox"/> | <a href="#">389</a> | 523.2669 | 1044.5193 |
| <input checked="" type="checkbox"/> | <a href="#">390</a> | 523.7711 | 1045.5276 |
| <input checked="" type="checkbox"/> | <a href="#">391</a> | 523.7729 | 1045.5312 |
| <input checked="" type="checkbox"/> | <a href="#">393</a> | 523.8018 | 1045.5891 |
| <input checked="" type="checkbox"/> | <a href="#">394</a> | 523.8018 | 1045.5891 |
| <input checked="" type="checkbox"/> | <a href="#">395</a> | 523.8030 | 1045.5915 |
| <input checked="" type="checkbox"/> | <a href="#">396</a> | 524.7614 | 1047.5083 |
| <input checked="" type="checkbox"/> | <a href="#">397</a> | 524.7615 | 1047.5084 |
| <input checked="" type="checkbox"/> | <a href="#">402</a> | 525.7646 | 1049.5147 |
| <input checked="" type="checkbox"/> | <a href="#">403</a> | 525.7650 | 1049.5153 |
| <input checked="" type="checkbox"/> | <a href="#">404</a> | 525.7688 | 1049.5230 |
| <input checked="" type="checkbox"/> | <a href="#">405</a> | 526.2766 | 1050.5386 |
| <input checked="" type="checkbox"/> | <a href="#">406</a> | 527.2887 | 1052.5629 |
| <input checked="" type="checkbox"/> | <a href="#">407</a> | 527.2894 | 1052.5642 |
| <input checked="" type="checkbox"/> | <a href="#">408</a> | 528.7759 | 1055.5373 |
| <input checked="" type="checkbox"/> | <a href="#">409</a> | 528.7762 | 1055.5378 |
| <input checked="" type="checkbox"/> | <a href="#">412</a> | 529.2948 | 1056.5751 |
| <input checked="" type="checkbox"/> | <a href="#">418</a> | 530.2922 | 1058.5698 |
| <input checked="" type="checkbox"/> | <a href="#">419</a> | 530.2939 | 1058.5732 |
| <input checked="" type="checkbox"/> | <a href="#">420</a> | 530.7845 | 1059.5545 |
| <input checked="" type="checkbox"/> | <a href="#">421</a> | 530.7861 | 1059.5577 |
| <input checked="" type="checkbox"/> | <a href="#">424</a> | 533.2619 | 1064.5092 |
| <input checked="" type="checkbox"/> | <a href="#">425</a> | 533.7855 | 1065.5565 |
| <input checked="" type="checkbox"/> | <a href="#">426</a> | 534.2541 | 1066.4937 |
| <input checked="" type="checkbox"/> | <a href="#">429</a> | 536.2560 | 1070.4975 |
| <input checked="" type="checkbox"/> | <a href="#">430</a> | 536.7556 | 1071.4967 |
| <input checked="" type="checkbox"/> | <a href="#">432</a> | 537.8035 | 1073.5925 |
| <input checked="" type="checkbox"/> | <a href="#">433</a> | 537.8055 | 1073.5965 |
| <input checked="" type="checkbox"/> | <a href="#">436</a> | 538.3016 | 1074.5886 |
| <input checked="" type="checkbox"/> | <a href="#">438</a> | 538.8064 | 1075.5982 |
| <input checked="" type="checkbox"/> | <a href="#">439</a> | 538.8064 | 1075.5982 |
| <input checked="" type="checkbox"/> | <a href="#">442</a> | 539.2828 | 1076.5510 |
| <input checked="" type="checkbox"/> | <a href="#">443</a> | 539.7414 | 1077.4682 |
| <input checked="" type="checkbox"/> | <a href="#">444</a> | 539.7633 | 1077.5121 |
| <input checked="" type="checkbox"/> | <a href="#">445</a> | 539.7636 | 1077.5126 |
| <input checked="" type="checkbox"/> | <a href="#">446</a> | 540.7982 | 1079.5818 |
| <input checked="" type="checkbox"/> | <a href="#">447</a> | 540.9097 | 1079.8048 |
| <input checked="" type="checkbox"/> | <a href="#">448</a> | 541.2760 | 1080.5374 |
| <input checked="" type="checkbox"/> | <a href="#">450</a> | 541.7823 | 1081.5500 |
| <input checked="" type="checkbox"/> | <a href="#">451</a> | 541.7824 | 1081.5503 |
| <input checked="" type="checkbox"/> | <a href="#">452</a> | 361.5378 | 1081.5917 |
| <input checked="" type="checkbox"/> | <a href="#">453</a> | 541.8181 | 1081.6217 |
| <input checked="" type="checkbox"/> | <a href="#">455</a> | 542.1968 | 1082.3791 |
| <input checked="" type="checkbox"/> | <a href="#">456</a> | 542.3062 | 1082.5978 |
| <input checked="" type="checkbox"/> | <a href="#">457</a> | 542.7837 | 1083.5528 |
| <input checked="" type="checkbox"/> | <a href="#">458</a> | 543.3131 | 1084.6116 |
| <input checked="" type="checkbox"/> | <a href="#">459</a> | 543.3134 | 1084.6122 |
| <input checked="" type="checkbox"/> | <a href="#">460</a> | 543.3151 | 1084.6156 |
| <input checked="" type="checkbox"/> | <a href="#">461</a> | 543.7651 | 1085.5156 |
| <input checked="" type="checkbox"/> | <a href="#">462</a> | 543.7652 | 1085.5158 |
| <input checked="" type="checkbox"/> | <a href="#">463</a> | 543.7658 | 1085.5170 |
| <input checked="" type="checkbox"/> | <a href="#">464</a> | 544.2509 | 1086.4872 |
| <input checked="" type="checkbox"/> | <a href="#">465</a> | 544.2658 | 1086.5171 |
| <input checked="" type="checkbox"/> | <a href="#">466</a> | 544.2848 | 1086.5551 |
| <input checked="" type="checkbox"/> | <a href="#">467</a> | 364.5694 | 1090.6863 |
| <input checked="" type="checkbox"/> | <a href="#">468</a> | 546.6289 | 1091.2433 |
| <input checked="" type="checkbox"/> | <a href="#">469</a> | 364.8645 | 1091.5717 |
| <input checked="" type="checkbox"/> | <a href="#">470</a> | 546.8354 | 1091.6562 |
| <input checked="" type="checkbox"/> | <a href="#">471</a> | 547.2668 | 1092.5191 |
| <input checked="" type="checkbox"/> | <a href="#">472</a> | 547.3294 | 1092.6443 |
| <input checked="" type="checkbox"/> | <a href="#">473</a> | 547.8140 | 1093.6134 |
| <input checked="" type="checkbox"/> | <a href="#">474</a> | 550.3041 | 1098.5936 |
| <input checked="" type="checkbox"/> | <a href="#">475</a> | 550.3045 | 1098.5944 |
| <input checked="" type="checkbox"/> | <a href="#">480</a> | 550.8047 | 1099.5949 |
| <input checked="" type="checkbox"/> | <a href="#">486</a> | 368.5530 | 1102.6370 |
| <input checked="" type="checkbox"/> | <a href="#">487</a> | 368.5532 | 1102.6378 |
| <input checked="" type="checkbox"/> | <a href="#">490</a> | 552.7695 | 1103.5245 |
| <input checked="" type="checkbox"/> | <a href="#">491</a> | 553.2820 | 1104.5494 |
| <input checked="" type="checkbox"/> | <a href="#">494</a> | 369.2043 | 1104.5910 |
| <input checked="" type="checkbox"/> | <a href="#">495</a> | 553.7903 | 1105.5661 |
| <input checked="" type="checkbox"/> | <a href="#">496</a> | 554.2754 | 1106.5362 |
| <input checked="" type="checkbox"/> | <a href="#">499</a> | 554.3039 | 1106.5933 |
| <input checked="" type="checkbox"/> | <a href="#">500</a> | 554.3039 | 1106.5933 |
| <input checked="" type="checkbox"/> | <a href="#">501</a> | 554.7500 | 1107.4854 |

|                                     |                     |          |           |
|-------------------------------------|---------------------|----------|-----------|
| <input checked="" type="checkbox"/> | <a href="#">502</a> | 554.7500 | 1107.4854 |
| <input checked="" type="checkbox"/> | <a href="#">503</a> | 370.8469 | 1109.5189 |
| <input checked="" type="checkbox"/> | <a href="#">504</a> | 556.9493 | 1111.8839 |
| <input checked="" type="checkbox"/> | <a href="#">505</a> | 557.8202 | 1113.6259 |
| <input checked="" type="checkbox"/> | <a href="#">506</a> | 557.8207 | 1113.6267 |
| <input checked="" type="checkbox"/> | <a href="#">508</a> | 558.2997 | 1114.5849 |
| <input checked="" type="checkbox"/> | <a href="#">509</a> | 558.3016 | 1114.5886 |
| <input checked="" type="checkbox"/> | <a href="#">510</a> | 558.7740 | 1115.5334 |
| <input checked="" type="checkbox"/> | <a href="#">511</a> | 559.7948 | 1117.5751 |
| <input checked="" type="checkbox"/> | <a href="#">512</a> | 559.8187 | 1117.6227 |
| <input checked="" type="checkbox"/> | <a href="#">513</a> | 559.8188 | 1117.6229 |
| <input checked="" type="checkbox"/> | <a href="#">514</a> | 560.2967 | 1118.5788 |
| <input checked="" type="checkbox"/> | <a href="#">516</a> | 374.2048 | 1119.5925 |
| <input checked="" type="checkbox"/> | <a href="#">517</a> | 374.2048 | 1119.5925 |
| <input checked="" type="checkbox"/> | <a href="#">518</a> | 561.2952 | 1120.5757 |
| <input checked="" type="checkbox"/> | <a href="#">519</a> | 561.2954 | 1120.5762 |
| <input checked="" type="checkbox"/> | <a href="#">520</a> | 561.2954 | 1120.5762 |
| <input checked="" type="checkbox"/> | <a href="#">521</a> | 561.7921 | 1121.5696 |
| <input checked="" type="checkbox"/> | <a href="#">522</a> | 561.7922 | 1121.5698 |
| <input checked="" type="checkbox"/> | <a href="#">523</a> | 561.8280 | 1121.6414 |
| <input checked="" type="checkbox"/> | <a href="#">524</a> | 561.8287 | 1121.6429 |
| <input checked="" type="checkbox"/> | <a href="#">525</a> | 561.8288 | 1121.6430 |
| <input checked="" type="checkbox"/> | <a href="#">528</a> | 565.3091 | 1128.6037 |
| <input checked="" type="checkbox"/> | <a href="#">530</a> | 565.7779 | 1129.5412 |
| <input checked="" type="checkbox"/> | <a href="#">531</a> | 565.7779 | 1129.5413 |
| <input checked="" type="checkbox"/> | <a href="#">532</a> | 565.7780 | 1129.5415 |
| <input checked="" type="checkbox"/> | <a href="#">533</a> | 565.8245 | 1129.6345 |
| <input checked="" type="checkbox"/> | <a href="#">539</a> | 566.9799 | 1131.9452 |
| <input checked="" type="checkbox"/> | <a href="#">542</a> | 568.3052 | 1134.5957 |
| <input checked="" type="checkbox"/> | <a href="#">543</a> | 568.7705 | 1135.5265 |
| <input checked="" type="checkbox"/> | <a href="#">544</a> | 568.7707 | 1135.5268 |
| <input checked="" type="checkbox"/> | <a href="#">545</a> | 569.2774 | 1136.5403 |
| <input checked="" type="checkbox"/> | <a href="#">546</a> | 569.3023 | 1136.5900 |
| <input checked="" type="checkbox"/> | <a href="#">547</a> | 569.7723 | 1137.5301 |
| <input checked="" type="checkbox"/> | <a href="#">548</a> | 570.3468 | 1138.6791 |
| <input checked="" type="checkbox"/> | <a href="#">549</a> | 571.3070 | 1140.5994 |
| <input checked="" type="checkbox"/> | <a href="#">550</a> | 571.3074 | 1140.6002 |
| <input checked="" type="checkbox"/> | <a href="#">551</a> | 571.3074 | 1140.6002 |
| <input checked="" type="checkbox"/> | <a href="#">552</a> | 572.7731 | 1143.5316 |
| <input checked="" type="checkbox"/> | <a href="#">553</a> | 572.7740 | 1143.5335 |
| <input checked="" type="checkbox"/> | <a href="#">555</a> | 572.7954 | 1143.5762 |
| <input checked="" type="checkbox"/> | <a href="#">556</a> | 572.7975 | 1143.5804 |
| <input checked="" type="checkbox"/> | <a href="#">557</a> | 572.8376 | 1143.6606 |
| <input checked="" type="checkbox"/> | <a href="#">558</a> | 572.8390 | 1143.6635 |
| <input checked="" type="checkbox"/> | <a href="#">560</a> | 573.2926 | 1144.5706 |
| <input checked="" type="checkbox"/> | <a href="#">561</a> | 573.3202 | 1144.6259 |
| <input checked="" type="checkbox"/> | <a href="#">562</a> | 573.3202 | 1144.6259 |
| <input checked="" type="checkbox"/> | <a href="#">563</a> | 573.3206 | 1144.6266 |
| <input checked="" type="checkbox"/> | <a href="#">564</a> | 574.6686 | 1147.3226 |
| <input checked="" type="checkbox"/> | <a href="#">565</a> | 575.3025 | 1148.5905 |
| <input checked="" type="checkbox"/> | <a href="#">566</a> | 575.3035 | 1148.5924 |
| <input checked="" type="checkbox"/> | <a href="#">567</a> | 383.8717 | 1148.5932 |
| <input checked="" type="checkbox"/> | <a href="#">568</a> | 383.8717 | 1148.5932 |
| <input checked="" type="checkbox"/> | <a href="#">569</a> | 383.8717 | 1148.5932 |
| <input checked="" type="checkbox"/> | <a href="#">570</a> | 383.8717 | 1148.5932 |
| <input checked="" type="checkbox"/> | <a href="#">571</a> | 383.8717 | 1148.5933 |
| <input checked="" type="checkbox"/> | <a href="#">572</a> | 576.2868 | 1150.5591 |
| <input checked="" type="checkbox"/> | <a href="#">573</a> | 385.2139 | 1152.6198 |
| <input checked="" type="checkbox"/> | <a href="#">574</a> | 385.2139 | 1152.6198 |
| <input checked="" type="checkbox"/> | <a href="#">575</a> | 577.7706 | 1153.5266 |
| <input checked="" type="checkbox"/> | <a href="#">576</a> | 578.3289 | 1154.6433 |
| <input checked="" type="checkbox"/> | <a href="#">579</a> | 578.8390 | 1155.6634 |
| <input checked="" type="checkbox"/> | <a href="#">581</a> | 581.2796 | 1160.5446 |
| <input checked="" type="checkbox"/> | <a href="#">583</a> | 581.3137 | 1160.6128 |
| <input checked="" type="checkbox"/> | <a href="#">584</a> | 581.3148 | 1160.6150 |
| <input checked="" type="checkbox"/> | <a href="#">585</a> | 581.3159 | 1160.6172 |
| <input checked="" type="checkbox"/> | <a href="#">602</a> | 586.3187 | 1170.6228 |
| <input checked="" type="checkbox"/> | <a href="#">603</a> | 586.3187 | 1170.6229 |
| <input checked="" type="checkbox"/> | <a href="#">604</a> | 586.3191 | 1170.6237 |
| <input checked="" type="checkbox"/> | <a href="#">605</a> | 586.8431 | 1171.6716 |
| <input checked="" type="checkbox"/> | <a href="#">606</a> | 587.8255 | 1173.6364 |
| <input checked="" type="checkbox"/> | <a href="#">607</a> | 588.8044 | 1175.5942 |
| <input checked="" type="checkbox"/> | <a href="#">608</a> | 588.8044 | 1175.5943 |
| <input checked="" type="checkbox"/> | <a href="#">611</a> | 590.3036 | 1178.5926 |
| <input checked="" type="checkbox"/> | <a href="#">612</a> | 590.3038 | 1178.5930 |
| <input checked="" type="checkbox"/> | <a href="#">613</a> | 590.3150 | 1178.6154 |
| <input checked="" type="checkbox"/> | <a href="#">614</a> | 590.3152 | 1178.6158 |
| <input checked="" type="checkbox"/> | <a href="#">615</a> | 590.3224 | 1178.6303 |
| <input checked="" type="checkbox"/> | <a href="#">616</a> | 590.3229 | 1178.6313 |
| <input checked="" type="checkbox"/> | <a href="#">617</a> | 590.3240 | 1178.6335 |
| <input checked="" type="checkbox"/> | <a href="#">618</a> | 590.3260 | 1178.6374 |
| <input checked="" type="checkbox"/> | <a href="#">619</a> | 590.3263 | 1178.6381 |
| <input checked="" type="checkbox"/> | <a href="#">620</a> | 590.3274 | 1178.6402 |
| <input checked="" type="checkbox"/> | <a href="#">621</a> | 590.8121 | 1179.6096 |
| <input checked="" type="checkbox"/> | <a href="#">622</a> | 590.8137 | 1179.6128 |
| <input checked="" type="checkbox"/> | <a href="#">623</a> | 590.8138 | 1179.6130 |
| <input checked="" type="checkbox"/> | <a href="#">624</a> | 590.8149 | 1179.6152 |
| <input checked="" type="checkbox"/> | <a href="#">625</a> | 590.8150 | 1179.6154 |
| <input checked="" type="checkbox"/> | <a href="#">626</a> | 590.8250 | 1179.6355 |
| <input checked="" type="checkbox"/> | <a href="#">628</a> | 395.8651 | 1184.5736 |
| <input checked="" type="checkbox"/> | <a href="#">629</a> | 395.8654 | 1184.5744 |
| <input checked="" type="checkbox"/> | <a href="#">630</a> | 395.8656 | 1184.5749 |
| <input checked="" type="checkbox"/> | <a href="#">631</a> | 395.8656 | 1184.5750 |
| <input checked="" type="checkbox"/> | <a href="#">632</a> | 593.3089 | 1184.6033 |

|                                     |                     |          |           |
|-------------------------------------|---------------------|----------|-----------|
| <input checked="" type="checkbox"/> | <a href="#">633</a> | 593.3090 | 1184.6034 |
| <input checked="" type="checkbox"/> | <a href="#">634</a> | 593.3091 | 1184.6037 |
| <input checked="" type="checkbox"/> | <a href="#">635</a> | 593.3092 | 1184.6038 |
| <input checked="" type="checkbox"/> | <a href="#">636</a> | 593.3092 | 1184.6039 |
| <input checked="" type="checkbox"/> | <a href="#">637</a> | 395.9031 | 1184.6873 |
| <input checked="" type="checkbox"/> | <a href="#">638</a> | 593.3513 | 1184.6880 |
| <input checked="" type="checkbox"/> | <a href="#">639</a> | 593.7962 | 1185.5779 |
| <input checked="" type="checkbox"/> | <a href="#">640</a> | 593.8279 | 1185.6413 |
| <input checked="" type="checkbox"/> | <a href="#">641</a> | 593.8304 | 1185.6463 |
| <input checked="" type="checkbox"/> | <a href="#">642</a> | 396.2237 | 1185.6494 |
| <input checked="" type="checkbox"/> | <a href="#">643</a> | 396.2237 | 1185.6494 |
| <input checked="" type="checkbox"/> | <a href="#">644</a> | 593.8327 | 1185.6509 |
| <input checked="" type="checkbox"/> | <a href="#">645</a> | 595.2768 | 1188.5390 |
| <input checked="" type="checkbox"/> | <a href="#">646</a> | 595.2787 | 1188.5429 |
| <input checked="" type="checkbox"/> | <a href="#">648</a> | 596.8193 | 1191.6240 |
| <input checked="" type="checkbox"/> | <a href="#">649</a> | 596.8198 | 1191.6251 |
| <input checked="" type="checkbox"/> | <a href="#">650</a> | 597.2835 | 1192.5525 |
| <input checked="" type="checkbox"/> | <a href="#">651</a> | 597.2837 | 1192.5528 |
| <input checked="" type="checkbox"/> | <a href="#">652</a> | 597.3057 | 1192.5969 |
| <input checked="" type="checkbox"/> | <a href="#">653</a> | 597.3077 | 1192.6008 |
| <input checked="" type="checkbox"/> | <a href="#">654</a> | 597.8274 | 1193.6402 |
| <input checked="" type="checkbox"/> | <a href="#">655</a> | 399.2147 | 1194.6221 |
| <input checked="" type="checkbox"/> | <a href="#">656</a> | 598.8168 | 1195.6190 |
| <input checked="" type="checkbox"/> | <a href="#">657</a> | 598.8177 | 1195.6209 |
| <input checked="" type="checkbox"/> | <a href="#">660</a> | 599.3498 | 1196.6850 |
| <input checked="" type="checkbox"/> | <a href="#">661</a> | 599.8175 | 1197.6204 |
| <input checked="" type="checkbox"/> | <a href="#">664</a> | 600.8384 | 1199.6623 |
| <input checked="" type="checkbox"/> | <a href="#">665</a> | 601.2952 | 1200.5758 |
| <input checked="" type="checkbox"/> | <a href="#">666</a> | 601.2960 | 1200.5774 |
| <input checked="" type="checkbox"/> | <a href="#">667</a> | 601.2967 | 1200.5789 |
| <input checked="" type="checkbox"/> | <a href="#">668</a> | 601.8288 | 1201.6431 |
| <input checked="" type="checkbox"/> | <a href="#">669</a> | 601.9965 | 1201.9785 |
| <input checked="" type="checkbox"/> | <a href="#">670</a> | 603.0118 | 1204.0090 |
| <input checked="" type="checkbox"/> | <a href="#">671</a> | 603.3205 | 1204.6265 |
| <input checked="" type="checkbox"/> | <a href="#">672</a> | 604.3016 | 1206.5887 |
| <input checked="" type="checkbox"/> | <a href="#">673</a> | 604.3185 | 1206.6225 |
| <input checked="" type="checkbox"/> | <a href="#">674</a> | 604.8123 | 1207.6100 |
| <input checked="" type="checkbox"/> | <a href="#">675</a> | 405.8986 | 1214.6740 |
| <input checked="" type="checkbox"/> | <a href="#">676</a> | 608.8555 | 1215.6964 |
| <input checked="" type="checkbox"/> | <a href="#">677</a> | 608.8558 | 1215.6971 |
| <input checked="" type="checkbox"/> | <a href="#">678</a> | 608.8560 | 1215.6974 |
| <input checked="" type="checkbox"/> | <a href="#">679</a> | 608.8561 | 1215.6977 |
| <input checked="" type="checkbox"/> | <a href="#">680</a> | 609.3335 | 1216.6525 |
| <input checked="" type="checkbox"/> | <a href="#">681</a> | 610.3369 | 1218.6592 |
| <input checked="" type="checkbox"/> | <a href="#">682</a> | 611.3103 | 1220.6061 |
| <input checked="" type="checkbox"/> | <a href="#">685</a> | 408.2140 | 1221.6201 |
| <input checked="" type="checkbox"/> | <a href="#">687</a> | 408.2186 | 1221.6341 |
| <input checked="" type="checkbox"/> | <a href="#">688</a> | 613.3078 | 1224.6011 |
| <input checked="" type="checkbox"/> | <a href="#">689</a> | 613.3089 | 1224.6031 |
| <input checked="" type="checkbox"/> | <a href="#">690</a> | 613.3090 | 1224.6034 |
| <input checked="" type="checkbox"/> | <a href="#">691</a> | 409.5471 | 1225.6195 |
| <input checked="" type="checkbox"/> | <a href="#">692</a> | 409.5475 | 1225.6207 |
| <input checked="" type="checkbox"/> | <a href="#">693</a> | 409.5475 | 1225.6207 |
| <input checked="" type="checkbox"/> | <a href="#">694</a> | 613.8395 | 1225.6644 |
| <input checked="" type="checkbox"/> | <a href="#">696</a> | 613.8709 | 1225.7273 |
| <input checked="" type="checkbox"/> | <a href="#">697</a> | 614.2858 | 1226.5570 |
| <input checked="" type="checkbox"/> | <a href="#">698</a> | 614.2865 | 1226.5584 |
| <input checked="" type="checkbox"/> | <a href="#">699</a> | 614.7891 | 1227.5636 |
| <input checked="" type="checkbox"/> | <a href="#">700</a> | 615.3033 | 1228.5920 |
| <input checked="" type="checkbox"/> | <a href="#">701</a> | 615.3655 | 1228.7164 |
| <input checked="" type="checkbox"/> | <a href="#">702</a> | 615.3661 | 1228.7176 |
| <input checked="" type="checkbox"/> | <a href="#">703</a> | 615.3665 | 1228.7184 |
| <input checked="" type="checkbox"/> | <a href="#">704</a> | 615.3667 | 1228.7188 |
| <input checked="" type="checkbox"/> | <a href="#">705</a> | 615.8177 | 1229.6208 |
| <input checked="" type="checkbox"/> | <a href="#">706</a> | 616.8013 | 1231.5881 |
| <input checked="" type="checkbox"/> | <a href="#">707</a> | 616.9599 | 1231.9052 |
| <input checked="" type="checkbox"/> | <a href="#">708</a> | 617.3202 | 1232.6258 |
| <input checked="" type="checkbox"/> | <a href="#">709</a> | 617.3205 | 1232.6264 |
| <input checked="" type="checkbox"/> | <a href="#">710</a> | 412.2308 | 1233.6707 |
| <input checked="" type="checkbox"/> | <a href="#">711</a> | 618.2900 | 1234.5654 |
| <input checked="" type="checkbox"/> | <a href="#">712</a> | 618.2903 | 1234.5661 |
| <input checked="" type="checkbox"/> | <a href="#">713</a> | 618.2906 | 1234.5666 |
| <input checked="" type="checkbox"/> | <a href="#">714</a> | 619.0040 | 1235.9934 |
| <input checked="" type="checkbox"/> | <a href="#">715</a> | 619.3225 | 1236.6305 |
| <input checked="" type="checkbox"/> | <a href="#">716</a> | 619.8001 | 1237.5857 |
| <input checked="" type="checkbox"/> | <a href="#">717</a> | 619.8004 | 1237.5862 |
| <input checked="" type="checkbox"/> | <a href="#">718</a> | 414.2176 | 1239.6310 |
| <input checked="" type="checkbox"/> | <a href="#">719</a> | 414.5538 | 1240.6396 |
| <input checked="" type="checkbox"/> | <a href="#">720</a> | 621.6551 | 1241.2957 |
| <input checked="" type="checkbox"/> | <a href="#">721</a> | 621.8194 | 1241.6242 |
| <input checked="" type="checkbox"/> | <a href="#">722</a> | 621.8525 | 1241.6904 |
| <input checked="" type="checkbox"/> | <a href="#">723</a> | 621.8573 | 1241.6999 |
| <input checked="" type="checkbox"/> | <a href="#">724</a> | 622.2910 | 1242.5674 |
| <input checked="" type="checkbox"/> | <a href="#">725</a> | 622.3440 | 1242.6734 |
| <input checked="" type="checkbox"/> | <a href="#">726</a> | 415.2447 | 1242.7122 |
| <input checked="" type="checkbox"/> | <a href="#">727</a> | 415.8521 | 1244.5344 |
| <input checked="" type="checkbox"/> | <a href="#">728</a> | 416.1778 | 1245.5116 |
| <input checked="" type="checkbox"/> | <a href="#">729</a> | 416.1808 | 1245.5206 |
| <input checked="" type="checkbox"/> | <a href="#">730</a> | 623.8244 | 1245.6343 |
| <input checked="" type="checkbox"/> | <a href="#">731</a> | 623.8250 | 1245.6354 |
| <input checked="" type="checkbox"/> | <a href="#">732</a> | 623.8253 | 1245.6361 |
| <input checked="" type="checkbox"/> | <a href="#">733</a> | 623.8256 | 1245.6367 |
| <input checked="" type="checkbox"/> | <a href="#">734</a> | 625.3299 | 1248.6452 |
| <input checked="" type="checkbox"/> | <a href="#">735</a> | 625.3301 | 1248.6456 |

|                                     |                     |          |           |
|-------------------------------------|---------------------|----------|-----------|
| <input checked="" type="checkbox"/> | <a href="#">736</a> | 625.8156 | 1249.6166 |
| <input checked="" type="checkbox"/> | <a href="#">737</a> | 625.8183 | 1249.6221 |
| <input checked="" type="checkbox"/> | <a href="#">738</a> | 625.8223 | 1249.6300 |
| <input checked="" type="checkbox"/> | <a href="#">739</a> | 627.3206 | 1252.6266 |
| <input checked="" type="checkbox"/> | <a href="#">740</a> | 627.8064 | 1253.5982 |
| <input checked="" type="checkbox"/> | <a href="#">741</a> | 628.3057 | 1254.5969 |
| <input checked="" type="checkbox"/> | <a href="#">742</a> | 628.3058 | 1254.5970 |
| <input checked="" type="checkbox"/> | <a href="#">743</a> | 628.3122 | 1254.6099 |
| <input checked="" type="checkbox"/> | <a href="#">744</a> | 628.3354 | 1254.6562 |
| <input checked="" type="checkbox"/> | <a href="#">745</a> | 628.7984 | 1255.5822 |
| <input checked="" type="checkbox"/> | <a href="#">746</a> | 629.7981 | 1257.5816 |
| <input checked="" type="checkbox"/> | <a href="#">747</a> | 629.8007 | 1257.5868 |
| <input checked="" type="checkbox"/> | <a href="#">748</a> | 630.3149 | 1258.6152 |
| <input checked="" type="checkbox"/> | <a href="#">750</a> | 630.8250 | 1259.6354 |
| <input checked="" type="checkbox"/> | <a href="#">751</a> | 631.2976 | 1260.5806 |
| <input checked="" type="checkbox"/> | <a href="#">752</a> | 631.2981 | 1260.5816 |
| <input checked="" type="checkbox"/> | <a href="#">757</a> | 632.8263 | 1263.6381 |
| <input checked="" type="checkbox"/> | <a href="#">759</a> | 422.8923 | 1265.6550 |
| <input checked="" type="checkbox"/> | <a href="#">760</a> | 634.3411 | 1266.6677 |
| <input checked="" type="checkbox"/> | <a href="#">762</a> | 423.2382 | 1266.6926 |
| <input checked="" type="checkbox"/> | <a href="#">763</a> | 634.3537 | 1266.6928 |
| <input checked="" type="checkbox"/> | <a href="#">764</a> | 423.2389 | 1266.6947 |
| <input checked="" type="checkbox"/> | <a href="#">765</a> | 635.3631 | 1268.7116 |
| <input checked="" type="checkbox"/> | <a href="#">766</a> | 635.3633 | 1268.7121 |
| <input checked="" type="checkbox"/> | <a href="#">767</a> | 635.7846 | 1269.5546 |
| <input checked="" type="checkbox"/> | <a href="#">768</a> | 635.7856 | 1269.5566 |
| <input checked="" type="checkbox"/> | <a href="#">769</a> | 636.3148 | 1270.6151 |
| <input checked="" type="checkbox"/> | <a href="#">770</a> | 637.3663 | 1272.7180 |
| <input checked="" type="checkbox"/> | <a href="#">771</a> | 637.3666 | 1272.7186 |
| <input checked="" type="checkbox"/> | <a href="#">772</a> | 638.3250 | 1274.6355 |
| <input checked="" type="checkbox"/> | <a href="#">773</a> | 638.8146 | 1275.6146 |
| <input checked="" type="checkbox"/> | <a href="#">774</a> | 639.3586 | 1276.7026 |
| <input checked="" type="checkbox"/> | <a href="#">775</a> | 639.3588 | 1276.7031 |
| <input checked="" type="checkbox"/> | <a href="#">776</a> | 427.2288 | 1278.6645 |
| <input checked="" type="checkbox"/> | <a href="#">777</a> | 428.9215 | 1283.7427 |
| <input checked="" type="checkbox"/> | <a href="#">778</a> | 643.3430 | 1284.6715 |
| <input checked="" type="checkbox"/> | <a href="#">780</a> | 643.8763 | 1285.7380 |
| <input checked="" type="checkbox"/> | <a href="#">781</a> | 643.8765 | 1285.7385 |
| <input checked="" type="checkbox"/> | <a href="#">782</a> | 643.8766 | 1285.7387 |
| <input checked="" type="checkbox"/> | <a href="#">783</a> | 643.8769 | 1285.7392 |
| <input checked="" type="checkbox"/> | <a href="#">784</a> | 643.8771 | 1285.7396 |
| <input checked="" type="checkbox"/> | <a href="#">785</a> | 643.8774 | 1285.7403 |
| <input checked="" type="checkbox"/> | <a href="#">786</a> | 644.3194 | 1286.6242 |
| <input checked="" type="checkbox"/> | <a href="#">787</a> | 644.3196 | 1286.6246 |
| <input checked="" type="checkbox"/> | <a href="#">788</a> | 644.3199 | 1286.6252 |
| <input checked="" type="checkbox"/> | <a href="#">789</a> | 645.2976 | 1288.5807 |
| <input checked="" type="checkbox"/> | <a href="#">790</a> | 645.2986 | 1288.5826 |
| <input checked="" type="checkbox"/> | <a href="#">791</a> | 645.2987 | 1288.5829 |
| <input checked="" type="checkbox"/> | <a href="#">792</a> | 430.5661 | 1288.6766 |
| <input checked="" type="checkbox"/> | <a href="#">793</a> | 430.5664 | 1288.6775 |
| <input checked="" type="checkbox"/> | <a href="#">794</a> | 431.1734 | 1290.4983 |
| <input checked="" type="checkbox"/> | <a href="#">795</a> | 646.7992 | 1291.5839 |
| <input checked="" type="checkbox"/> | <a href="#">796</a> | 646.8396 | 1291.6646 |
| <input checked="" type="checkbox"/> | <a href="#">801</a> | 431.9072 | 1292.6999 |
| <input checked="" type="checkbox"/> | <a href="#">802</a> | 431.9073 | 1292.7000 |
| <input checked="" type="checkbox"/> | <a href="#">803</a> | 431.9224 | 1292.7453 |
| <input checked="" type="checkbox"/> | <a href="#">804</a> | 431.9224 | 1292.7454 |
| <input checked="" type="checkbox"/> | <a href="#">805</a> | 647.8684 | 1293.7223 |
| <input checked="" type="checkbox"/> | <a href="#">807</a> | 648.8074 | 1295.6003 |
| <input checked="" type="checkbox"/> | <a href="#">808</a> | 648.8078 | 1295.6010 |
| <input checked="" type="checkbox"/> | <a href="#">809</a> | 648.8078 | 1295.6011 |
| <input checked="" type="checkbox"/> | <a href="#">810</a> | 648.8171 | 1295.6196 |
| <input checked="" type="checkbox"/> | <a href="#">811</a> | 649.3137 | 1296.6129 |
| <input checked="" type="checkbox"/> | <a href="#">812</a> | 433.5931 | 1297.7574 |
| <input checked="" type="checkbox"/> | <a href="#">813</a> | 650.2738 | 1298.5331 |
| <input checked="" type="checkbox"/> | <a href="#">814</a> | 433.8559 | 1298.5458 |
| <input checked="" type="checkbox"/> | <a href="#">815</a> | 434.1910 | 1299.5513 |
| <input checked="" type="checkbox"/> | <a href="#">818</a> | 651.8601 | 1301.7055 |
| <input checked="" type="checkbox"/> | <a href="#">819</a> | 651.8605 | 1301.7065 |
| <input checked="" type="checkbox"/> | <a href="#">820</a> | 651.8608 | 1301.7070 |
| <input checked="" type="checkbox"/> | <a href="#">821</a> | 651.8611 | 1301.7077 |
| <input checked="" type="checkbox"/> | <a href="#">824</a> | 436.8948 | 1307.6627 |
| <input checked="" type="checkbox"/> | <a href="#">825</a> | 655.3287 | 1308.6427 |
| <input checked="" type="checkbox"/> | <a href="#">826</a> | 656.8696 | 1311.7247 |
| <input checked="" type="checkbox"/> | <a href="#">827</a> | 656.8698 | 1311.7251 |
| <input checked="" type="checkbox"/> | <a href="#">830</a> | 657.8155 | 1313.6165 |
| <input checked="" type="checkbox"/> | <a href="#">831</a> | 657.8156 | 1313.6166 |
| <input checked="" type="checkbox"/> | <a href="#">832</a> | 657.8162 | 1313.6179 |
| <input checked="" type="checkbox"/> | <a href="#">833</a> | 657.8655 | 1313.7165 |
| <input checked="" type="checkbox"/> | <a href="#">834</a> | 657.8697 | 1313.7249 |
| <input checked="" type="checkbox"/> | <a href="#">835</a> | 657.8697 | 1313.7249 |
| <input checked="" type="checkbox"/> | <a href="#">836</a> | 438.9179 | 1313.7319 |
| <input checked="" type="checkbox"/> | <a href="#">837</a> | 657.8751 | 1313.7357 |
| <input checked="" type="checkbox"/> | <a href="#">838</a> | 438.9266 | 1313.7578 |
| <input checked="" type="checkbox"/> | <a href="#">839</a> | 438.9269 | 1313.7589 |
| <input checked="" type="checkbox"/> | <a href="#">840</a> | 658.8219 | 1315.6291 |
| <input checked="" type="checkbox"/> | <a href="#">841</a> | 439.8973 | 1316.6701 |
| <input checked="" type="checkbox"/> | <a href="#">842</a> | 661.8558 | 1321.6970 |
| <input checked="" type="checkbox"/> | <a href="#">843</a> | 441.5859 | 1321.7358 |
| <input checked="" type="checkbox"/> | <a href="#">844</a> | 441.9081 | 1322.7025 |
| <input checked="" type="checkbox"/> | <a href="#">845</a> | 442.5892 | 1324.7458 |
| <input checked="" type="checkbox"/> | <a href="#">846</a> | 442.5893 | 1324.7460 |
| <input checked="" type="checkbox"/> | <a href="#">847</a> | 664.3302 | 1326.6458 |
| <input checked="" type="checkbox"/> | <a href="#">848</a> | 664.3304 | 1326.6463 |

|                                     |                     |          |           |
|-------------------------------------|---------------------|----------|-----------|
| <input checked="" type="checkbox"/> | <a href="#">849</a> | 664.8259 | 1327.6372 |
| <input checked="" type="checkbox"/> | <a href="#">850</a> | 664.8261 | 1327.6376 |
| <input checked="" type="checkbox"/> | <a href="#">851</a> | 664.8319 | 1327.6493 |
| <input checked="" type="checkbox"/> | <a href="#">852</a> | 443.5583 | 1327.6532 |
| <input checked="" type="checkbox"/> | <a href="#">853</a> | 665.3321 | 1328.6496 |
| <input checked="" type="checkbox"/> | <a href="#">854</a> | 443.9061 | 1328.6965 |
| <input checked="" type="checkbox"/> | <a href="#">855</a> | 443.9094 | 1328.7064 |
| <input checked="" type="checkbox"/> | <a href="#">856</a> | 665.3654 | 1328.7162 |
| <input checked="" type="checkbox"/> | <a href="#">857</a> | 665.3661 | 1328.7177 |
| <input checked="" type="checkbox"/> | <a href="#">858</a> | 665.3666 | 1328.7186 |
| <input checked="" type="checkbox"/> | <a href="#">859</a> | 665.3672 | 1328.7198 |
| <input checked="" type="checkbox"/> | <a href="#">860</a> | 665.8644 | 1329.7142 |
| <input checked="" type="checkbox"/> | <a href="#">861</a> | 444.2731 | 1329.7976 |
| <input checked="" type="checkbox"/> | <a href="#">862</a> | 666.8296 | 1331.6447 |
| <input checked="" type="checkbox"/> | <a href="#">863</a> | 666.8314 | 1331.6482 |
| <input checked="" type="checkbox"/> | <a href="#">864</a> | 666.8315 | 1331.6485 |
| <input checked="" type="checkbox"/> | <a href="#">865</a> | 666.8520 | 1331.6895 |
| <input checked="" type="checkbox"/> | <a href="#">867</a> | 447.5609 | 1339.6608 |
| <input checked="" type="checkbox"/> | <a href="#">869</a> | 448.1714 | 1341.4923 |
| <input checked="" type="checkbox"/> | <a href="#">870</a> | 671.8444 | 1341.6742 |
| <input checked="" type="checkbox"/> | <a href="#">871</a> | 671.8530 | 1341.6914 |
| <input checked="" type="checkbox"/> | <a href="#">873</a> | 672.8251 | 1343.6357 |
| <input checked="" type="checkbox"/> | <a href="#">874</a> | 672.8256 | 1343.6367 |
| <input checked="" type="checkbox"/> | <a href="#">875</a> | 672.8260 | 1343.6374 |
| <input checked="" type="checkbox"/> | <a href="#">876</a> | 672.8279 | 1343.6412 |
| <input checked="" type="checkbox"/> | <a href="#">877</a> | 448.9244 | 1343.7513 |
| <input checked="" type="checkbox"/> | <a href="#">878</a> | 450.5105 | 1348.5097 |
| <input checked="" type="checkbox"/> | <a href="#">879</a> | 675.7061 | 1349.3976 |
| <input checked="" type="checkbox"/> | <a href="#">880</a> | 676.3482 | 1350.6818 |
| <input checked="" type="checkbox"/> | <a href="#">881</a> | 676.3487 | 1350.6829 |
| <input checked="" type="checkbox"/> | <a href="#">882</a> | 676.3495 | 1350.6845 |
| <input checked="" type="checkbox"/> | <a href="#">883</a> | 676.3814 | 1350.7483 |
| <input checked="" type="checkbox"/> | <a href="#">884</a> | 676.3814 | 1350.7483 |
| <input checked="" type="checkbox"/> | <a href="#">885</a> | 676.3821 | 1350.7496 |
| <input checked="" type="checkbox"/> | <a href="#">886</a> | 676.3828 | 1350.7510 |
| <input checked="" type="checkbox"/> | <a href="#">887</a> | 451.2578 | 1350.7516 |
| <input checked="" type="checkbox"/> | <a href="#">888</a> | 451.2579 | 1350.7518 |
| <input checked="" type="checkbox"/> | <a href="#">889</a> | 677.3484 | 1352.6823 |
| <input checked="" type="checkbox"/> | <a href="#">890</a> | 677.3553 | 1352.6960 |
| <input checked="" type="checkbox"/> | <a href="#">891</a> | 677.8693 | 1353.7240 |
| <input checked="" type="checkbox"/> | <a href="#">892</a> | 677.8700 | 1353.7254 |
| <input checked="" type="checkbox"/> | <a href="#">893</a> | 452.5470 | 1354.6191 |
| <input checked="" type="checkbox"/> | <a href="#">897</a> | 679.7985 | 1357.5824 |
| <input checked="" type="checkbox"/> | <a href="#">898</a> | 679.7985 | 1357.5824 |
| <input checked="" type="checkbox"/> | <a href="#">899</a> | 679.7996 | 1357.5846 |
| <input checked="" type="checkbox"/> | <a href="#">900</a> | 679.8540 | 1357.6934 |
| <input checked="" type="checkbox"/> | <a href="#">904</a> | 681.3465 | 1360.6784 |
| <input checked="" type="checkbox"/> | <a href="#">905</a> | 681.3490 | 1360.6835 |
| <input checked="" type="checkbox"/> | <a href="#">906</a> | 681.3500 | 1360.6854 |
| <input checked="" type="checkbox"/> | <a href="#">907</a> | 681.3501 | 1360.6856 |
| <input checked="" type="checkbox"/> | <a href="#">908</a> | 455.8887 | 1364.6442 |
| <input checked="" type="checkbox"/> | <a href="#">909</a> | 455.8887 | 1364.6443 |
| <input checked="" type="checkbox"/> | <a href="#">910</a> | 685.3563 | 1368.6980 |
| <input checked="" type="checkbox"/> | <a href="#">912</a> | 686.3823 | 1370.7500 |
| <input checked="" type="checkbox"/> | <a href="#">913</a> | 686.3825 | 1370.7504 |
| <input checked="" type="checkbox"/> | <a href="#">914</a> | 686.3827 | 1370.7508 |
| <input checked="" type="checkbox"/> | <a href="#">915</a> | 688.3691 | 1374.7236 |
| <input checked="" type="checkbox"/> | <a href="#">916</a> | 688.3695 | 1374.7244 |
| <input checked="" type="checkbox"/> | <a href="#">917</a> | 688.8354 | 1375.6563 |
| <input checked="" type="checkbox"/> | <a href="#">918</a> | 689.3314 | 1376.6482 |
| <input checked="" type="checkbox"/> | <a href="#">919</a> | 690.3661 | 1378.7176 |
| <input checked="" type="checkbox"/> | <a href="#">920</a> | 690.3661 | 1378.7176 |
| <input checked="" type="checkbox"/> | <a href="#">921</a> | 690.3665 | 1378.7184 |
| <input checked="" type="checkbox"/> | <a href="#">922</a> | 690.3665 | 1378.7184 |
| <input checked="" type="checkbox"/> | <a href="#">923</a> | 690.3665 | 1378.7184 |
| <input checked="" type="checkbox"/> | <a href="#">924</a> | 690.3665 | 1378.7184 |
| <input checked="" type="checkbox"/> | <a href="#">925</a> | 690.3666 | 1378.7186 |
| <input checked="" type="checkbox"/> | <a href="#">926</a> | 690.3666 | 1378.7186 |
| <input checked="" type="checkbox"/> | <a href="#">927</a> | 690.3666 | 1378.7186 |
| <input checked="" type="checkbox"/> | <a href="#">928</a> | 690.3666 | 1378.7186 |
| <input checked="" type="checkbox"/> | <a href="#">929</a> | 690.3666 | 1378.7186 |
| <input checked="" type="checkbox"/> | <a href="#">930</a> | 690.3666 | 1378.7187 |
| <input checked="" type="checkbox"/> | <a href="#">931</a> | 690.3666 | 1378.7187 |
| <input checked="" type="checkbox"/> | <a href="#">932</a> | 460.5808 | 1378.7205 |
| <input checked="" type="checkbox"/> | <a href="#">933</a> | 460.5810 | 1378.7213 |
| <input checked="" type="checkbox"/> | <a href="#">934</a> | 690.3696 | 1378.7247 |
| <input checked="" type="checkbox"/> | <a href="#">935</a> | 691.3275 | 1380.6404 |
| <input checked="" type="checkbox"/> | <a href="#">936</a> | 461.5505 | 1381.6296 |
| <input checked="" type="checkbox"/> | <a href="#">937</a> | 692.3472 | 1382.6798 |
| <input checked="" type="checkbox"/> | <a href="#">938</a> | 692.3473 | 1382.6800 |
| <input checked="" type="checkbox"/> | <a href="#">939</a> | 692.3569 | 1382.6992 |
| <input checked="" type="checkbox"/> | <a href="#">940</a> | 692.3585 | 1382.7024 |
| <input checked="" type="checkbox"/> | <a href="#">941</a> | 692.3585 | 1382.7024 |
| <input checked="" type="checkbox"/> | <a href="#">942</a> | 692.3597 | 1382.7048 |
| <input checked="" type="checkbox"/> | <a href="#">943</a> | 462.5263 | 1384.5570 |
| <input checked="" type="checkbox"/> | <a href="#">944</a> | 693.3664 | 1384.7181 |
| <input checked="" type="checkbox"/> | <a href="#">945</a> | 693.8692 | 1385.7239 |
| <input checked="" type="checkbox"/> | <a href="#">946</a> | 695.3406 | 1388.6667 |
| <input checked="" type="checkbox"/> | <a href="#">947</a> | 695.3412 | 1388.6678 |
| <input checked="" type="checkbox"/> | <a href="#">948</a> | 463.9074 | 1388.7003 |
| <input checked="" type="checkbox"/> | <a href="#">949</a> | 464.5884 | 1390.7434 |
| <input checked="" type="checkbox"/> | <a href="#">950</a> | 464.5888 | 1390.7446 |
| <input checked="" type="checkbox"/> | <a href="#">951</a> | 464.5888 | 1390.7447 |
| <input checked="" type="checkbox"/> | <a href="#">952</a> | 464.9157 | 1391.7253 |

|                                     |                      |          |           |
|-------------------------------------|----------------------|----------|-----------|
| <input checked="" type="checkbox"/> | <a href="#">953</a>  | 465.2490 | 1392.7251 |
| <input checked="" type="checkbox"/> | <a href="#">954</a>  | 465.2493 | 1392.7259 |
| <input checked="" type="checkbox"/> | <a href="#">955</a>  | 699.8867 | 1397.7588 |
| <input checked="" type="checkbox"/> | <a href="#">956</a>  | 700.3799 | 1398.7452 |
| <input checked="" type="checkbox"/> | <a href="#">957</a>  | 467.2569 | 1398.7489 |
| <input checked="" type="checkbox"/> | <a href="#">958</a>  | 700.8884 | 1399.7622 |
| <input checked="" type="checkbox"/> | <a href="#">959</a>  | 700.8902 | 1399.7659 |
| <input checked="" type="checkbox"/> | <a href="#">960</a>  | 700.8905 | 1399.7664 |
| <input checked="" type="checkbox"/> | <a href="#">961</a>  | 468.2210 | 1401.6413 |
| <input checked="" type="checkbox"/> | <a href="#">962</a>  | 701.8398 | 1401.6650 |
| <input checked="" type="checkbox"/> | <a href="#">963</a>  | 702.3428 | 1402.6710 |
| <input checked="" type="checkbox"/> | <a href="#">964</a>  | 702.3451 | 1402.6755 |
| <input checked="" type="checkbox"/> | <a href="#">965</a>  | 468.9136 | 1403.7189 |
| <input checked="" type="checkbox"/> | <a href="#">966</a>  | 468.9137 | 1403.7194 |
| <input checked="" type="checkbox"/> | <a href="#">967</a>  | 703.3689 | 1404.7232 |
| <input checked="" type="checkbox"/> | <a href="#">968</a>  | 703.3697 | 1404.7249 |
| <input checked="" type="checkbox"/> | <a href="#">969</a>  | 703.3698 | 1404.7251 |
| <input checked="" type="checkbox"/> | <a href="#">970</a>  | 703.3699 | 1404.7252 |
| <input checked="" type="checkbox"/> | <a href="#">971</a>  | 703.3701 | 1404.7256 |
| <input checked="" type="checkbox"/> | <a href="#">972</a>  | 703.3702 | 1404.7258 |
| <input checked="" type="checkbox"/> | <a href="#">973</a>  | 703.3714 | 1404.7282 |
| <input checked="" type="checkbox"/> | <a href="#">974</a>  | 703.3809 | 1404.7472 |
| <input checked="" type="checkbox"/> | <a href="#">975</a>  | 704.0158 | 1406.0170 |
| <input checked="" type="checkbox"/> | <a href="#">976</a>  | 469.8857 | 1406.6354 |
| <input checked="" type="checkbox"/> | <a href="#">977</a>  | 470.2648 | 1407.7726 |
| <input checked="" type="checkbox"/> | <a href="#">978</a>  | 705.3759 | 1408.7373 |
| <input checked="" type="checkbox"/> | <a href="#">979</a>  | 471.2752 | 1410.8038 |
| <input checked="" type="checkbox"/> | <a href="#">980</a>  | 471.5427 | 1411.6064 |
| <input checked="" type="checkbox"/> | <a href="#">981</a>  | 707.8777 | 1413.7407 |
| <input checked="" type="checkbox"/> | <a href="#">982</a>  | 472.5870 | 1414.7393 |
| <input checked="" type="checkbox"/> | <a href="#">983</a>  | 472.5872 | 1414.7397 |
| <input checked="" type="checkbox"/> | <a href="#">984</a>  | 708.8650 | 1415.7155 |
| <input checked="" type="checkbox"/> | <a href="#">985</a>  | 709.8612 | 1417.7079 |
| <input checked="" type="checkbox"/> | <a href="#">986</a>  | 714.3664 | 1426.7183 |
| <input checked="" type="checkbox"/> | <a href="#">987</a>  | 714.3680 | 1426.7215 |
| <input checked="" type="checkbox"/> | <a href="#">988</a>  | 714.3684 | 1426.7223 |
| <input checked="" type="checkbox"/> | <a href="#">990</a>  | 478.2171 | 1431.6294 |
| <input checked="" type="checkbox"/> | <a href="#">991</a>  | 718.3442 | 1434.6739 |
| <input checked="" type="checkbox"/> | <a href="#">992</a>  | 718.3444 | 1434.6742 |
| <input checked="" type="checkbox"/> | <a href="#">993</a>  | 718.3444 | 1434.6742 |
| <input checked="" type="checkbox"/> | <a href="#">995</a>  | 483.2580 | 1446.7521 |
| <input checked="" type="checkbox"/> | <a href="#">996</a>  | 724.8536 | 1447.6927 |
| <input checked="" type="checkbox"/> | <a href="#">997</a>  | 724.8543 | 1447.6940 |
| <input checked="" type="checkbox"/> | <a href="#">998</a>  | 725.9333 | 1449.8521 |
| <input checked="" type="checkbox"/> | <a href="#">999</a>  | 725.9345 | 1449.8545 |
| <input checked="" type="checkbox"/> | <a href="#">1000</a> | 725.9348 | 1449.8551 |
| <input checked="" type="checkbox"/> | <a href="#">1001</a> | 725.9349 | 1449.8553 |
| <input checked="" type="checkbox"/> | <a href="#">1002</a> | 484.2924 | 1449.8554 |
| <input checked="" type="checkbox"/> | <a href="#">1003</a> | 484.2924 | 1449.8554 |
| <input checked="" type="checkbox"/> | <a href="#">1004</a> | 484.2924 | 1449.8554 |
| <input checked="" type="checkbox"/> | <a href="#">1005</a> | 484.2924 | 1449.8554 |
| <input checked="" type="checkbox"/> | <a href="#">1006</a> | 484.2924 | 1449.8554 |
| <input checked="" type="checkbox"/> | <a href="#">1007</a> | 484.2924 | 1449.8554 |
| <input checked="" type="checkbox"/> | <a href="#">1008</a> | 484.2924 | 1449.8554 |
| <input checked="" type="checkbox"/> | <a href="#">1009</a> | 484.2924 | 1449.8554 |
| <input checked="" type="checkbox"/> | <a href="#">1010</a> | 484.2924 | 1449.8555 |
| <input checked="" type="checkbox"/> | <a href="#">1011</a> | 484.2924 | 1449.8555 |
| <input checked="" type="checkbox"/> | <a href="#">1012</a> | 485.9244 | 1454.7514 |
| <input checked="" type="checkbox"/> | <a href="#">1013</a> | 728.7201 | 1455.4257 |
| <input checked="" type="checkbox"/> | <a href="#">1014</a> | 728.7205 | 1455.4263 |
| <input checked="" type="checkbox"/> | <a href="#">1015</a> | 486.2384 | 1455.6933 |
| <input checked="" type="checkbox"/> | <a href="#">1016</a> | 486.2591 | 1455.7556 |
| <input checked="" type="checkbox"/> | <a href="#">1017</a> | 486.2593 | 1455.7560 |
| <input checked="" type="checkbox"/> | <a href="#">1018</a> | 486.2605 | 1455.7596 |
| <input checked="" type="checkbox"/> | <a href="#">1019</a> | 728.8908 | 1455.7671 |
| <input checked="" type="checkbox"/> | <a href="#">1020</a> | 486.2644 | 1455.7713 |
| <input checked="" type="checkbox"/> | <a href="#">1021</a> | 486.2646 | 1455.7720 |
| <input checked="" type="checkbox"/> | <a href="#">1022</a> | 486.2648 | 1455.7727 |
| <input checked="" type="checkbox"/> | <a href="#">1023</a> | 486.2648 | 1455.7727 |
| <input checked="" type="checkbox"/> | <a href="#">1024</a> | 486.2648 | 1455.7727 |
| <input checked="" type="checkbox"/> | <a href="#">1025</a> | 486.2650 | 1455.7730 |
| <input checked="" type="checkbox"/> | <a href="#">1026</a> | 730.3485 | 1458.6824 |
| <input checked="" type="checkbox"/> | <a href="#">1028</a> | 487.2598 | 1458.7575 |
| <input checked="" type="checkbox"/> | <a href="#">1029</a> | 487.2602 | 1458.7586 |
| <input checked="" type="checkbox"/> | <a href="#">1030</a> | 731.9116 | 1461.8086 |
| <input checked="" type="checkbox"/> | <a href="#">1031</a> | 731.9116 | 1461.8086 |
| <input checked="" type="checkbox"/> | <a href="#">1032</a> | 732.3617 | 1462.7088 |
| <input checked="" type="checkbox"/> | <a href="#">1033</a> | 733.8468 | 1465.6791 |
| <input checked="" type="checkbox"/> | <a href="#">1034</a> | 733.8469 | 1465.6792 |
| <input checked="" type="checkbox"/> | <a href="#">1035</a> | 489.5998 | 1465.7776 |
| <input checked="" type="checkbox"/> | <a href="#">1036</a> | 489.5998 | 1465.7776 |
| <input checked="" type="checkbox"/> | <a href="#">1037</a> | 489.5998 | 1465.7776 |
| <input checked="" type="checkbox"/> | <a href="#">1038</a> | 733.8961 | 1465.7777 |
| <input checked="" type="checkbox"/> | <a href="#">1039</a> | 490.9004 | 1469.6795 |
| <input checked="" type="checkbox"/> | <a href="#">1042</a> | 735.8868 | 1469.7591 |
| <input checked="" type="checkbox"/> | <a href="#">1043</a> | 490.9317 | 1469.7733 |
| <input checked="" type="checkbox"/> | <a href="#">1044</a> | 737.3335 | 1472.6524 |
| <input checked="" type="checkbox"/> | <a href="#">1045</a> | 737.3395 | 1472.6645 |
| <input checked="" type="checkbox"/> | <a href="#">1046</a> | 738.3756 | 1474.7366 |
| <input checked="" type="checkbox"/> | <a href="#">1047</a> | 738.3763 | 1474.7380 |
| <input checked="" type="checkbox"/> | <a href="#">1048</a> | 738.3961 | 1474.7777 |
| <input checked="" type="checkbox"/> | <a href="#">1049</a> | 738.3962 | 1474.7779 |
| <input checked="" type="checkbox"/> | <a href="#">1050</a> | 740.1136 | 1478.2126 |
| <input checked="" type="checkbox"/> | <a href="#">1051</a> | 493.9549 | 1478.8428 |



|                                     |                      |          |           |
|-------------------------------------|----------------------|----------|-----------|
| <input checked="" type="checkbox"/> | <a href="#">1052</a> | 494.2181 | 1479.6326 |
| <input checked="" type="checkbox"/> | <a href="#">1054</a> | 742.8773 | 1483.7399 |
| <input checked="" type="checkbox"/> | <a href="#">1055</a> | 745.3297 | 1488.6448 |
| <input checked="" type="checkbox"/> | <a href="#">1056</a> | 745.3297 | 1488.6449 |
| <input checked="" type="checkbox"/> | <a href="#">1057</a> | 745.3306 | 1488.6466 |
| <input checked="" type="checkbox"/> | <a href="#">1058</a> | 745.3361 | 1488.6575 |
| <input checked="" type="checkbox"/> | <a href="#">1059</a> | 745.9905 | 1489.9665 |
| <input checked="" type="checkbox"/> | <a href="#">1060</a> | 497.9390 | 1490.7951 |
| <input checked="" type="checkbox"/> | <a href="#">1061</a> | 498.5831 | 1492.7273 |
| <input checked="" type="checkbox"/> | <a href="#">1062</a> | 749.3899 | 1496.7651 |
| <input checked="" type="checkbox"/> | <a href="#">1063</a> | 499.9292 | 1496.7657 |
| <input checked="" type="checkbox"/> | <a href="#">1064</a> | 499.9292 | 1496.7657 |
| <input checked="" type="checkbox"/> | <a href="#">1065</a> | 749.3911 | 1496.7676 |
| <input checked="" type="checkbox"/> | <a href="#">1066</a> | 750.3447 | 1498.6748 |
| <input checked="" type="checkbox"/> | <a href="#">1067</a> | 750.3611 | 1498.7076 |
| <input checked="" type="checkbox"/> | <a href="#">1068</a> | 750.3611 | 1498.7076 |
| <input checked="" type="checkbox"/> | <a href="#">1069</a> | 750.9195 | 1499.8244 |
| <input checked="" type="checkbox"/> | <a href="#">1070</a> | 750.9265 | 1499.8384 |
| <input checked="" type="checkbox"/> | <a href="#">1071</a> | 501.2088 | 1500.6046 |
| <input checked="" type="checkbox"/> | <a href="#">1072</a> | 751.8615 | 1501.7084 |
| <input checked="" type="checkbox"/> | <a href="#">1074</a> | 502.8914 | 1505.6524 |
| <input checked="" type="checkbox"/> | <a href="#">1075</a> | 502.8916 | 1505.6531 |
| <input checked="" type="checkbox"/> | <a href="#">1076</a> | 754.3695 | 1506.7245 |
| <input checked="" type="checkbox"/> | <a href="#">1077</a> | 754.4437 | 1506.8729 |
| <input checked="" type="checkbox"/> | <a href="#">1078</a> | 754.4456 | 1506.8767 |
| <input checked="" type="checkbox"/> | <a href="#">1079</a> | 755.8480 | 1509.6815 |
| <input checked="" type="checkbox"/> | <a href="#">1080</a> | 756.3638 | 1510.7131 |
| <input checked="" type="checkbox"/> | <a href="#">1081</a> | 756.3646 | 1510.7146 |
| <input checked="" type="checkbox"/> | <a href="#">1082</a> | 505.2548 | 1512.7425 |
| <input checked="" type="checkbox"/> | <a href="#">1083</a> | 505.2548 | 1512.7427 |
| <input checked="" type="checkbox"/> | <a href="#">1084</a> | 505.2548 | 1512.7427 |
| <input checked="" type="checkbox"/> | <a href="#">1085</a> | 505.2548 | 1512.7427 |
| <input checked="" type="checkbox"/> | <a href="#">1086</a> | 757.3800 | 1512.7454 |
| <input checked="" type="checkbox"/> | <a href="#">1087</a> | 757.3809 | 1512.7472 |
| <input checked="" type="checkbox"/> | <a href="#">1088</a> | 757.3809 | 1512.7473 |
| <input checked="" type="checkbox"/> | <a href="#">1089</a> | 505.2674 | 1512.7804 |
| <input checked="" type="checkbox"/> | <a href="#">1090</a> | 757.3981 | 1512.7816 |
| <input checked="" type="checkbox"/> | <a href="#">1091</a> | 505.2706 | 1512.7901 |
| <input checked="" type="checkbox"/> | <a href="#">1092</a> | 505.5828 | 1513.7265 |
| <input checked="" type="checkbox"/> | <a href="#">1093</a> | 505.5868 | 1513.7385 |
| <input checked="" type="checkbox"/> | <a href="#">1094</a> | 757.8939 | 1513.7733 |
| <input checked="" type="checkbox"/> | <a href="#">1095</a> | 505.6070 | 1513.7991 |
| <input checked="" type="checkbox"/> | <a href="#">1099</a> | 506.2595 | 1515.7568 |
| <input checked="" type="checkbox"/> | <a href="#">1100</a> | 506.2598 | 1515.7574 |
| <input checked="" type="checkbox"/> | <a href="#">1101</a> | 506.6235 | 1516.8486 |
| <input checked="" type="checkbox"/> | <a href="#">1103</a> | 507.6040 | 1519.7900 |
| <input checked="" type="checkbox"/> | <a href="#">1104</a> | 508.2227 | 1521.6462 |
| <input checked="" type="checkbox"/> | <a href="#">1105</a> | 763.8881 | 1525.7617 |
| <input checked="" type="checkbox"/> | <a href="#">1106</a> | 764.3598 | 1526.7051 |
| <input checked="" type="checkbox"/> | <a href="#">1107</a> | 764.3601 | 1526.7057 |
| <input checked="" type="checkbox"/> | <a href="#">1108</a> | 764.3603 | 1526.7060 |
| <input checked="" type="checkbox"/> | <a href="#">1109</a> | 764.3614 | 1526.7083 |
| <input checked="" type="checkbox"/> | <a href="#">1110</a> | 764.3669 | 1526.7192 |
| <input checked="" type="checkbox"/> | <a href="#">1111</a> | 764.8731 | 1527.7316 |
| <input checked="" type="checkbox"/> | <a href="#">1112</a> | 764.8734 | 1527.7323 |
| <input checked="" type="checkbox"/> | <a href="#">1113</a> | 510.9139 | 1529.7200 |
| <input checked="" type="checkbox"/> | <a href="#">1114</a> | 510.9140 | 1529.7203 |
| <input checked="" type="checkbox"/> | <a href="#">1115</a> | 510.9146 | 1529.7220 |
| <input checked="" type="checkbox"/> | <a href="#">1118</a> | 511.9568 | 1532.8487 |
| <input checked="" type="checkbox"/> | <a href="#">1119</a> | 513.9251 | 1538.7534 |
| <input checked="" type="checkbox"/> | <a href="#">1120</a> | 513.9414 | 1538.8024 |
| <input checked="" type="checkbox"/> | <a href="#">1125</a> | 770.9781 | 1539.9417 |
| <input checked="" type="checkbox"/> | <a href="#">1126</a> | 514.6143 | 1540.8210 |
| <input checked="" type="checkbox"/> | <a href="#">1127</a> | 514.6145 | 1540.8218 |
| <input checked="" type="checkbox"/> | <a href="#">1128</a> | 514.8601 | 1541.5586 |
| <input checked="" type="checkbox"/> | <a href="#">1129</a> | 781.9091 | 1561.8036 |
| <input checked="" type="checkbox"/> | <a href="#">1130</a> | 781.9094 | 1561.8043 |
| <input checked="" type="checkbox"/> | <a href="#">1131</a> | 781.9147 | 1561.8148 |
| <input checked="" type="checkbox"/> | <a href="#">1132</a> | 521.8993 | 1562.6760 |
| <input checked="" type="checkbox"/> | <a href="#">1133</a> | 521.8993 | 1562.6761 |
| <input checked="" type="checkbox"/> | <a href="#">1135</a> | 783.4472 | 1564.8798 |
| <input checked="" type="checkbox"/> | <a href="#">1136</a> | 783.4490 | 1564.8834 |
| <input checked="" type="checkbox"/> | <a href="#">1137</a> | 522.6352 | 1564.8838 |
| <input checked="" type="checkbox"/> | <a href="#">1138</a> | 783.4501 | 1564.8857 |
| <input checked="" type="checkbox"/> | <a href="#">1139</a> | 522.8930 | 1565.6573 |
| <input checked="" type="checkbox"/> | <a href="#">1140</a> | 522.8930 | 1565.6573 |
| <input checked="" type="checkbox"/> | <a href="#">1141</a> | 784.3756 | 1566.7367 |
| <input checked="" type="checkbox"/> | <a href="#">1142</a> | 784.3779 | 1566.7412 |
| <input checked="" type="checkbox"/> | <a href="#">1143</a> | 784.5960 | 1567.1774 |
| <input checked="" type="checkbox"/> | <a href="#">1144</a> | 785.8916 | 1569.7687 |
| <input checked="" type="checkbox"/> | <a href="#">1145</a> | 785.9491 | 1569.8837 |
| <input checked="" type="checkbox"/> | <a href="#">1148</a> | 524.3021 | 1569.8846 |
| <input checked="" type="checkbox"/> | <a href="#">1149</a> | 524.3021 | 1569.8846 |
| <input checked="" type="checkbox"/> | <a href="#">1153</a> | 524.3027 | 1569.8863 |
| <input checked="" type="checkbox"/> | <a href="#">1154</a> | 785.9505 | 1569.8864 |
| <input checked="" type="checkbox"/> | <a href="#">1155</a> | 787.8379 | 1573.6613 |
| <input checked="" type="checkbox"/> | <a href="#">1156</a> | 788.8458 | 1575.6771 |
| <input checked="" type="checkbox"/> | <a href="#">1157</a> | 790.0633 | 1578.1120 |
| <input checked="" type="checkbox"/> | <a href="#">1158</a> | 527.5458 | 1579.6155 |
| <input checked="" type="checkbox"/> | <a href="#">1159</a> | 790.8859 | 1579.7571 |
| <input checked="" type="checkbox"/> | <a href="#">1160</a> | 790.8860 | 1579.7575 |
| <input checked="" type="checkbox"/> | <a href="#">1161</a> | 527.6186 | 1579.8340 |
| <input checked="" type="checkbox"/> | <a href="#">1162</a> | 527.6189 | 1579.8349 |
| <input checked="" type="checkbox"/> | <a href="#">1163</a> | 527.6191 | 1579.8356 |

|                                     |                      |          |           |
|-------------------------------------|----------------------|----------|-----------|
| <input checked="" type="checkbox"/> | <a href="#">1164</a> | 793.8809 | 1585.7472 |
| <input checked="" type="checkbox"/> | <a href="#">1165</a> | 793.8810 | 1585.7474 |
| <input checked="" type="checkbox"/> | <a href="#">1166</a> | 793.8815 | 1585.7485 |
| <input checked="" type="checkbox"/> | <a href="#">1169</a> | 530.2987 | 1587.8743 |
| <input checked="" type="checkbox"/> | <a href="#">1170</a> | 530.9624 | 1589.8653 |
| <input checked="" type="checkbox"/> | <a href="#">1171</a> | 531.9464 | 1592.8174 |
| <input checked="" type="checkbox"/> | <a href="#">1172</a> | 797.4249 | 1592.8353 |
| <input checked="" type="checkbox"/> | <a href="#">1173</a> | 797.4267 | 1592.8389 |
| <input checked="" type="checkbox"/> | <a href="#">1174</a> | 800.3706 | 1598.7266 |
| <input checked="" type="checkbox"/> | <a href="#">1175</a> | 534.2874 | 1599.8403 |
| <input checked="" type="checkbox"/> | <a href="#">1176</a> | 801.0211 | 1600.0277 |
| <input checked="" type="checkbox"/> | <a href="#">1177</a> | 804.3844 | 1606.7543 |
| <input checked="" type="checkbox"/> | <a href="#">1178</a> | 804.9059 | 1607.7973 |
| <input checked="" type="checkbox"/> | <a href="#">1179</a> | 808.1621 | 1614.3096 |
| <input checked="" type="checkbox"/> | <a href="#">1180</a> | 539.9072 | 1616.6999 |
| <input checked="" type="checkbox"/> | <a href="#">1181</a> | 540.2728 | 1617.7965 |
| <input checked="" type="checkbox"/> | <a href="#">1182</a> | 540.2728 | 1617.7965 |
| <input checked="" type="checkbox"/> | <a href="#">1183</a> | 541.9403 | 1622.7992 |
| <input checked="" type="checkbox"/> | <a href="#">1184</a> | 407.7108 | 1626.8142 |
| <input checked="" type="checkbox"/> | <a href="#">1185</a> | 544.2938 | 1629.8594 |
| <input checked="" type="checkbox"/> | <a href="#">1186</a> | 818.1527 | 1634.2908 |
| <input checked="" type="checkbox"/> | <a href="#">1187</a> | 546.6246 | 1636.8520 |
| <input checked="" type="checkbox"/> | <a href="#">1188</a> | 547.2249 | 1638.6530 |
| <input checked="" type="checkbox"/> | <a href="#">1189</a> | 821.2204 | 1640.4263 |
| <input checked="" type="checkbox"/> | <a href="#">1190</a> | 547.9462 | 1640.8167 |
| <input checked="" type="checkbox"/> | <a href="#">1191</a> | 550.2798 | 1647.8176 |
| <input checked="" type="checkbox"/> | <a href="#">1192</a> | 824.9179 | 1647.8213 |
| <input checked="" type="checkbox"/> | <a href="#">1193</a> | 824.9179 | 1647.8213 |
| <input checked="" type="checkbox"/> | <a href="#">1194</a> | 824.9179 | 1647.8213 |
| <input checked="" type="checkbox"/> | <a href="#">1196</a> | 551.2881 | 1650.8424 |
| <input checked="" type="checkbox"/> | <a href="#">1197</a> | 827.4254 | 1652.8363 |
| <input checked="" type="checkbox"/> | <a href="#">1198</a> | 551.9958 | 1652.9655 |
| <input checked="" type="checkbox"/> | <a href="#">1199</a> | 552.6045 | 1654.7918 |
| <input checked="" type="checkbox"/> | <a href="#">1200</a> | 552.6046 | 1654.7920 |
| <input checked="" type="checkbox"/> | <a href="#">1201</a> | 552.6047 | 1654.7923 |
| <input checked="" type="checkbox"/> | <a href="#">1202</a> | 829.0844 | 1656.1543 |
| <input checked="" type="checkbox"/> | <a href="#">1203</a> | 554.6536 | 1660.9390 |
| <input checked="" type="checkbox"/> | <a href="#">1204</a> | 833.3851 | 1664.7556 |
| <input checked="" type="checkbox"/> | <a href="#">1212</a> | 834.3723 | 1666.7301 |
| <input checked="" type="checkbox"/> | <a href="#">1213</a> | 834.3801 | 1666.7456 |
| <input checked="" type="checkbox"/> | <a href="#">1214</a> | 834.3801 | 1666.7456 |
| <input checked="" type="checkbox"/> | <a href="#">1215</a> | 834.3802 | 1666.7458 |
| <input checked="" type="checkbox"/> | <a href="#">1216</a> | 834.3802 | 1666.7458 |
| <input checked="" type="checkbox"/> | <a href="#">1217</a> | 834.3802 | 1666.7458 |
| <input checked="" type="checkbox"/> | <a href="#">1218</a> | 834.3802 | 1666.7458 |
| <input checked="" type="checkbox"/> | <a href="#">1219</a> | 834.3802 | 1666.7458 |
| <input checked="" type="checkbox"/> | <a href="#">1220</a> | 834.3802 | 1666.7458 |
| <input checked="" type="checkbox"/> | <a href="#">1221</a> | 834.3803 | 1666.7460 |
| <input checked="" type="checkbox"/> | <a href="#">1222</a> | 834.3803 | 1666.7460 |
| <input checked="" type="checkbox"/> | <a href="#">1223</a> | 834.3803 | 1666.7460 |
| <input checked="" type="checkbox"/> | <a href="#">1224</a> | 556.5895 | 1666.7466 |
| <input checked="" type="checkbox"/> | <a href="#">1225</a> | 556.5898 | 1666.7477 |
| <input checked="" type="checkbox"/> | <a href="#">1226</a> | 556.5900 | 1666.7481 |
| <input checked="" type="checkbox"/> | <a href="#">1227</a> | 556.6224 | 1666.8453 |
| <input checked="" type="checkbox"/> | <a href="#">1228</a> | 834.4305 | 1666.8465 |
| <input checked="" type="checkbox"/> | <a href="#">1229</a> | 556.6230 | 1666.8471 |
| <input checked="" type="checkbox"/> | <a href="#">1230</a> | 556.6230 | 1666.8471 |
| <input checked="" type="checkbox"/> | <a href="#">1231</a> | 560.2938 | 1677.8597 |
| <input checked="" type="checkbox"/> | <a href="#">1232</a> | 840.4242 | 1678.8338 |
| <input checked="" type="checkbox"/> | <a href="#">1233</a> | 840.4243 | 1678.8341 |
| <input checked="" type="checkbox"/> | <a href="#">1234</a> | 840.4244 | 1678.8342 |
| <input checked="" type="checkbox"/> | <a href="#">1235</a> | 560.6187 | 1678.8344 |
| <input checked="" type="checkbox"/> | <a href="#">1236</a> | 560.6194 | 1678.8363 |
| <input checked="" type="checkbox"/> | <a href="#">1237</a> | 560.6199 | 1678.8379 |
| <input checked="" type="checkbox"/> | <a href="#">1238</a> | 560.6199 | 1678.8379 |
| <input checked="" type="checkbox"/> | <a href="#">1239</a> | 560.6199 | 1678.8379 |
| <input checked="" type="checkbox"/> | <a href="#">1240</a> | 560.6199 | 1678.8379 |
| <input checked="" type="checkbox"/> | <a href="#">1241</a> | 560.6199 | 1678.8379 |
| <input checked="" type="checkbox"/> | <a href="#">1242</a> | 560.6199 | 1678.8379 |
| <input checked="" type="checkbox"/> | <a href="#">1243</a> | 560.6199 | 1678.8379 |
| <input checked="" type="checkbox"/> | <a href="#">1244</a> | 560.6199 | 1678.8379 |
| <input checked="" type="checkbox"/> | <a href="#">1245</a> | 560.6199 | 1678.8379 |
| <input checked="" type="checkbox"/> | <a href="#">1246</a> | 560.6199 | 1678.8379 |
| <input checked="" type="checkbox"/> | <a href="#">1247</a> | 560.6200 | 1678.8381 |
| <input checked="" type="checkbox"/> | <a href="#">1248</a> | 560.9548 | 1679.8426 |
| <input checked="" type="checkbox"/> | <a href="#">1249</a> | 560.9582 | 1679.8527 |
| <input checked="" type="checkbox"/> | <a href="#">1250</a> | 421.5815 | 1682.2968 |
| <input checked="" type="checkbox"/> | <a href="#">1251</a> | 561.9427 | 1682.8064 |
| <input checked="" type="checkbox"/> | <a href="#">1253</a> | 565.2757 | 1692.8053 |
| <input checked="" type="checkbox"/> | <a href="#">1254</a> | 565.2770 | 1692.8093 |
| <input checked="" type="checkbox"/> | <a href="#">1255</a> | 848.3807 | 1694.7468 |
| <input checked="" type="checkbox"/> | <a href="#">1256</a> | 848.6268 | 1695.2391 |
| <input checked="" type="checkbox"/> | <a href="#">1257</a> | 566.9799 | 1697.9179 |
| <input checked="" type="checkbox"/> | <a href="#">1258</a> | 567.2906 | 1698.8499 |
| <input checked="" type="checkbox"/> | <a href="#">1259</a> | 567.3244 | 1698.9514 |
| <input checked="" type="checkbox"/> | <a href="#">1260</a> | 851.4560 | 1700.8974 |
| <input checked="" type="checkbox"/> | <a href="#">1261</a> | 567.9733 | 1700.8982 |
| <input checked="" type="checkbox"/> | <a href="#">1262</a> | 854.3924 | 1706.7702 |
| <input checked="" type="checkbox"/> | <a href="#">1263</a> | 854.4463 | 1706.8781 |
| <input checked="" type="checkbox"/> | <a href="#">1264</a> | 854.4466 | 1706.8785 |
| <input checked="" type="checkbox"/> | <a href="#">1265</a> | 569.9851 | 1706.9334 |
| <input checked="" type="checkbox"/> | <a href="#">1266</a> | 569.9857 | 1706.9352 |
| <input checked="" type="checkbox"/> | <a href="#">1267</a> | 569.9863 | 1706.9369 |
| <input checked="" type="checkbox"/> | <a href="#">1268</a> | 570.6235 | 1708.8487 |

|                                     |                      |          |           |
|-------------------------------------|----------------------|----------|-----------|
| <input checked="" type="checkbox"/> | <a href="#">1269</a> | 570.6237 | 1708.8491 |
| <input checked="" type="checkbox"/> | <a href="#">1270</a> | 571.5897 | 1711.7473 |
| <input checked="" type="checkbox"/> | <a href="#">1271</a> | 856.8812 | 1711.7479 |
| <input checked="" type="checkbox"/> | <a href="#">1272</a> | 856.8816 | 1711.7487 |
| <input checked="" type="checkbox"/> | <a href="#">1273</a> | 856.8816 | 1711.7487 |
| <input checked="" type="checkbox"/> | <a href="#">1274</a> | 856.8817 | 1711.7489 |
| <input checked="" type="checkbox"/> | <a href="#">1275</a> | 571.5905 | 1711.7498 |
| <input checked="" type="checkbox"/> | <a href="#">1276</a> | 571.5905 | 1711.7498 |
| <input checked="" type="checkbox"/> | <a href="#">1277</a> | 571.5905 | 1711.7498 |
| <input checked="" type="checkbox"/> | <a href="#">1278</a> | 571.5905 | 1711.7498 |
| <input checked="" type="checkbox"/> | <a href="#">1279</a> | 571.5905 | 1711.7498 |
| <input checked="" type="checkbox"/> | <a href="#">1280</a> | 571.6119 | 1711.8138 |
| <input checked="" type="checkbox"/> | <a href="#">1281</a> | 857.3702 | 1712.7259 |
| <input checked="" type="checkbox"/> | <a href="#">1282</a> | 571.9304 | 1712.7693 |
| <input checked="" type="checkbox"/> | <a href="#">1283</a> | 572.0097 | 1713.0073 |
| <input checked="" type="checkbox"/> | <a href="#">1284</a> | 857.5114 | 1713.0083 |
| <input checked="" type="checkbox"/> | <a href="#">1285</a> | 857.5114 | 1713.0083 |
| <input checked="" type="checkbox"/> | <a href="#">1286</a> | 857.5114 | 1713.0083 |
| <input checked="" type="checkbox"/> | <a href="#">1287</a> | 857.5119 | 1713.0092 |
| <input checked="" type="checkbox"/> | <a href="#">1288</a> | 858.4826 | 1714.9506 |
| <input checked="" type="checkbox"/> | <a href="#">1289</a> | 572.6577 | 1714.9512 |
| <input checked="" type="checkbox"/> | <a href="#">1290</a> | 572.6577 | 1714.9512 |
| <input checked="" type="checkbox"/> | <a href="#">1291</a> | 858.4832 | 1714.9518 |
| <input checked="" type="checkbox"/> | <a href="#">1292</a> | 572.6582 | 1714.9527 |
| <input checked="" type="checkbox"/> | <a href="#">1293</a> | 572.6582 | 1714.9527 |
| <input checked="" type="checkbox"/> | <a href="#">1294</a> | 572.6582 | 1714.9527 |
| <input checked="" type="checkbox"/> | <a href="#">1295</a> | 572.6583 | 1714.9530 |
| <input checked="" type="checkbox"/> | <a href="#">1296</a> | 572.6583 | 1714.9530 |
| <input checked="" type="checkbox"/> | <a href="#">1297</a> | 572.6583 | 1714.9530 |
| <input checked="" type="checkbox"/> | <a href="#">1298</a> | 573.9291 | 1718.7654 |
| <input checked="" type="checkbox"/> | <a href="#">1299</a> | 573.9300 | 1718.7682 |
| <input checked="" type="checkbox"/> | <a href="#">1300</a> | 574.2273 | 1719.6601 |
| <input checked="" type="checkbox"/> | <a href="#">1301</a> | 574.2276 | 1719.6610 |
| <input checked="" type="checkbox"/> | <a href="#">1302</a> | 574.2782 | 1719.8128 |
| <input checked="" type="checkbox"/> | <a href="#">1303</a> | 574.2782 | 1719.8128 |
| <input checked="" type="checkbox"/> | <a href="#">1304</a> | 574.2803 | 1719.8191 |
| <input checked="" type="checkbox"/> | <a href="#">1305</a> | 574.6106 | 1720.8099 |
| <input checked="" type="checkbox"/> | <a href="#">1306</a> | 574.9827 | 1721.9263 |
| <input checked="" type="checkbox"/> | <a href="#">1307</a> | 431.4902 | 1721.9317 |
| <input checked="" type="checkbox"/> | <a href="#">1308</a> | 431.4902 | 1721.9317 |
| <input checked="" type="checkbox"/> | <a href="#">1309</a> | 431.4902 | 1721.9317 |
| <input checked="" type="checkbox"/> | <a href="#">1310</a> | 578.2563 | 1731.7470 |
| <input checked="" type="checkbox"/> | <a href="#">1311</a> | 578.2563 | 1731.7470 |
| <input checked="" type="checkbox"/> | <a href="#">1312</a> | 579.2992 | 1734.8759 |
| <input checked="" type="checkbox"/> | <a href="#">1313</a> | 872.9595 | 1743.9044 |
| <input checked="" type="checkbox"/> | <a href="#">1314</a> | 872.9603 | 1743.9061 |
| <input checked="" type="checkbox"/> | <a href="#">1315</a> | 583.9929 | 1748.9568 |
| <input checked="" type="checkbox"/> | <a href="#">1316</a> | 583.9933 | 1748.9580 |
| <input checked="" type="checkbox"/> | <a href="#">1317</a> | 583.9937 | 1748.9592 |
| <input checked="" type="checkbox"/> | <a href="#">1318</a> | 584.2838 | 1749.8294 |
| <input checked="" type="checkbox"/> | <a href="#">1319</a> | 585.9551 | 1754.8436 |
| <input checked="" type="checkbox"/> | <a href="#">1320</a> | 585.9558 | 1754.8455 |
| <input checked="" type="checkbox"/> | <a href="#">1321</a> | 586.3257 | 1755.9554 |
| <input checked="" type="checkbox"/> | <a href="#">1322</a> | 586.9715 | 1757.8928 |
| <input checked="" type="checkbox"/> | <a href="#">1323</a> | 586.9717 | 1757.8934 |
| <input checked="" type="checkbox"/> | <a href="#">1324</a> | 879.9549 | 1757.8953 |
| <input checked="" type="checkbox"/> | <a href="#">1325</a> | 879.9560 | 1757.8975 |
| <input checked="" type="checkbox"/> | <a href="#">1326</a> | 586.9732 | 1757.8977 |
| <input checked="" type="checkbox"/> | <a href="#">1327</a> | 586.9736 | 1757.8990 |
| <input checked="" type="checkbox"/> | <a href="#">1328</a> | 586.9736 | 1757.8990 |
| <input checked="" type="checkbox"/> | <a href="#">1329</a> | 586.9736 | 1757.8990 |
| <input checked="" type="checkbox"/> | <a href="#">1330</a> | 587.6137 | 1759.8192 |
| <input checked="" type="checkbox"/> | <a href="#">1331</a> | 587.9532 | 1760.8378 |
| <input checked="" type="checkbox"/> | <a href="#">1332</a> | 589.2271 | 1764.6594 |
| <input checked="" type="checkbox"/> | <a href="#">1333</a> | 589.3231 | 1764.9475 |
| <input checked="" type="checkbox"/> | <a href="#">1334</a> | 883.5058 | 1764.9971 |
| <input checked="" type="checkbox"/> | <a href="#">1335</a> | 883.5060 | 1764.9974 |
| <input checked="" type="checkbox"/> | <a href="#">1336</a> | 883.5061 | 1764.9976 |
| <input checked="" type="checkbox"/> | <a href="#">1337</a> | 883.5062 | 1764.9979 |
| <input checked="" type="checkbox"/> | <a href="#">1338</a> | 883.5063 | 1764.9980 |
| <input checked="" type="checkbox"/> | <a href="#">1339</a> | 883.5064 | 1764.9982 |
| <input checked="" type="checkbox"/> | <a href="#">1340</a> | 883.5067 | 1764.9988 |
| <input checked="" type="checkbox"/> | <a href="#">1341</a> | 883.5067 | 1764.9989 |
| <input checked="" type="checkbox"/> | <a href="#">1342</a> | 883.5067 | 1764.9989 |
| <input checked="" type="checkbox"/> | <a href="#">1343</a> | 883.5069 | 1764.9992 |
| <input checked="" type="checkbox"/> | <a href="#">1344</a> | 883.5069 | 1764.9992 |
| <input checked="" type="checkbox"/> | <a href="#">1345</a> | 883.5069 | 1764.9992 |
| <input checked="" type="checkbox"/> | <a href="#">1346</a> | 883.5069 | 1764.9992 |
| <input checked="" type="checkbox"/> | <a href="#">1347</a> | 883.5069 | 1764.9992 |
| <input checked="" type="checkbox"/> | <a href="#">1348</a> | 883.5069 | 1764.9992 |
| <input checked="" type="checkbox"/> | <a href="#">1349</a> | 883.5069 | 1764.9992 |
| <input checked="" type="checkbox"/> | <a href="#">1350</a> | 883.5069 | 1764.9992 |
| <input checked="" type="checkbox"/> | <a href="#">1351</a> | 883.5069 | 1764.9992 |
| <input checked="" type="checkbox"/> | <a href="#">1355</a> | 591.9147 | 1772.7223 |
| <input checked="" type="checkbox"/> | <a href="#">1356</a> | 592.3116 | 1773.9129 |
| <input checked="" type="checkbox"/> | <a href="#">1357</a> | 592.3124 | 1773.9154 |
| <input checked="" type="checkbox"/> | <a href="#">1358</a> | 592.3124 | 1773.9154 |
| <input checked="" type="checkbox"/> | <a href="#">1359</a> | 593.2838 | 1776.8295 |
| <input checked="" type="checkbox"/> | <a href="#">1360</a> | 594.9379 | 1781.7919 |
| <input checked="" type="checkbox"/> | <a href="#">1361</a> | 594.9382 | 1781.7927 |
| <input checked="" type="checkbox"/> | <a href="#">1362</a> | 595.2862 | 1782.8368 |
| <input checked="" type="checkbox"/> | <a href="#">1363</a> | 894.7133 | 1787.4121 |
| <input checked="" type="checkbox"/> | <a href="#">1364</a> | 597.2810 | 1788.8211 |
| <input checked="" type="checkbox"/> | <a href="#">1374</a> | 597.9530 | 1790.8372 |

|                                     |                      |          |           |
|-------------------------------------|----------------------|----------|-----------|
| <input checked="" type="checkbox"/> | <a href="#">1375</a> | 599.9810 | 1796.9211 |
| <input checked="" type="checkbox"/> | <a href="#">1376</a> | 600.2690 | 1797.7853 |
| <input checked="" type="checkbox"/> | <a href="#">1377</a> | 600.2708 | 1797.7907 |
| <input checked="" type="checkbox"/> | <a href="#">1378</a> | 600.2708 | 1797.7907 |
| <input checked="" type="checkbox"/> | <a href="#">1379</a> | 601.9724 | 1802.8955 |
| <input checked="" type="checkbox"/> | <a href="#">1380</a> | 604.6132 | 1810.8176 |
| <input checked="" type="checkbox"/> | <a href="#">1381</a> | 604.9662 | 1811.8769 |
| <input checked="" type="checkbox"/> | <a href="#">1382</a> | 604.9670 | 1811.8792 |
| <input checked="" type="checkbox"/> | <a href="#">1383</a> | 606.9784 | 1817.9134 |
| <input checked="" type="checkbox"/> | <a href="#">1384</a> | 606.9784 | 1817.9135 |
| <input checked="" type="checkbox"/> | <a href="#">1385</a> | 456.5008 | 1821.9741 |
| <input checked="" type="checkbox"/> | <a href="#">1386</a> | 456.5011 | 1821.9754 |
| <input checked="" type="checkbox"/> | <a href="#">1387</a> | 456.5012 | 1821.9756 |
| <input checked="" type="checkbox"/> | <a href="#">1388</a> | 608.6251 | 1822.8536 |
| <input checked="" type="checkbox"/> | <a href="#">1389</a> | 608.6595 | 1822.9567 |
| <input checked="" type="checkbox"/> | <a href="#">1390</a> | 456.9824 | 1823.9005 |
| <input checked="" type="checkbox"/> | <a href="#">1391</a> | 609.0004 | 1823.9793 |
| <input checked="" type="checkbox"/> | <a href="#">1392</a> | 609.6548 | 1825.9427 |
| <input checked="" type="checkbox"/> | <a href="#">1393</a> | 610.6389 | 1828.8949 |
| <input checked="" type="checkbox"/> | <a href="#">1394</a> | 615.2720 | 1842.7942 |
| <input checked="" type="checkbox"/> | <a href="#">1395</a> | 616.9553 | 1847.8442 |
| <input checked="" type="checkbox"/> | <a href="#">1396</a> | 463.6824 | 1850.7003 |
| <input checked="" type="checkbox"/> | <a href="#">1397</a> | 619.2766 | 1854.8079 |
| <input checked="" type="checkbox"/> | <a href="#">1398</a> | 619.2767 | 1854.8082 |
| <input checked="" type="checkbox"/> | <a href="#">1399</a> | 619.3420 | 1855.0041 |
| <input checked="" type="checkbox"/> | <a href="#">1400</a> | 931.9796 | 1861.9445 |
| <input checked="" type="checkbox"/> | <a href="#">1402</a> | 621.6572 | 1861.9499 |
| <input checked="" type="checkbox"/> | <a href="#">1403</a> | 621.6572 | 1861.9499 |
| <input checked="" type="checkbox"/> | <a href="#">1404</a> | 621.6572 | 1861.9499 |
| <input checked="" type="checkbox"/> | <a href="#">1405</a> | 621.9953 | 1862.9641 |
| <input checked="" type="checkbox"/> | <a href="#">1406</a> | 621.9960 | 1862.9663 |
| <input checked="" type="checkbox"/> | <a href="#">1407</a> | 932.9288 | 1863.8430 |
| <input checked="" type="checkbox"/> | <a href="#">1408</a> | 622.2885 | 1863.8438 |
| <input checked="" type="checkbox"/> | <a href="#">1409</a> | 622.2885 | 1863.8438 |
| <input checked="" type="checkbox"/> | <a href="#">1410</a> | 622.2885 | 1863.8438 |
| <input checked="" type="checkbox"/> | <a href="#">1411</a> | 622.2885 | 1863.8438 |
| <input checked="" type="checkbox"/> | <a href="#">1412</a> | 622.2886 | 1863.8440 |
| <input checked="" type="checkbox"/> | <a href="#">1413</a> | 622.2886 | 1863.8440 |
| <input checked="" type="checkbox"/> | <a href="#">1414</a> | 468.0219 | 1868.0587 |
| <input checked="" type="checkbox"/> | <a href="#">1415</a> | 626.9872 | 1877.9396 |
| <input checked="" type="checkbox"/> | <a href="#">1416</a> | 627.2894 | 1878.8463 |
| <input checked="" type="checkbox"/> | <a href="#">1417</a> | 940.4385 | 1878.8624 |
| <input checked="" type="checkbox"/> | <a href="#">1418</a> | 639.6213 | 1915.8422 |
| <input checked="" type="checkbox"/> | <a href="#">1419</a> | 639.9592 | 1916.8557 |
| <input checked="" type="checkbox"/> | <a href="#">1420</a> | 961.8154 | 1921.6162 |
| <input checked="" type="checkbox"/> | <a href="#">1421</a> | 641.6498 | 1921.9276 |
| <input checked="" type="checkbox"/> | <a href="#">1422</a> | 644.3944 | 1930.1613 |
| <input checked="" type="checkbox"/> | <a href="#">1423</a> | 644.3951 | 1930.1636 |
| <input checked="" type="checkbox"/> | <a href="#">1424</a> | 966.5020 | 1930.9894 |
| <input checked="" type="checkbox"/> | <a href="#">1425</a> | 967.0002 | 1931.9859 |
| <input checked="" type="checkbox"/> | <a href="#">1426</a> | 645.9798 | 1934.9177 |
| <input checked="" type="checkbox"/> | <a href="#">1427</a> | 646.3171 | 1935.9296 |
| <input checked="" type="checkbox"/> | <a href="#">1428</a> | 646.3176 | 1935.9309 |
| <input checked="" type="checkbox"/> | <a href="#">1429</a> | 646.3185 | 1935.9336 |
| <input checked="" type="checkbox"/> | <a href="#">1430</a> | 487.7442 | 1946.9479 |
| <input checked="" type="checkbox"/> | <a href="#">1434</a> | 652.3460 | 1954.0161 |
| <input checked="" type="checkbox"/> | <a href="#">1435</a> | 652.6660 | 1954.9762 |
| <input checked="" type="checkbox"/> | <a href="#">1436</a> | 652.6661 | 1954.9764 |
| <input checked="" type="checkbox"/> | <a href="#">1437</a> | 652.6666 | 1954.9779 |
| <input checked="" type="checkbox"/> | <a href="#">1438</a> | 652.6864 | 1955.0373 |
| <input checked="" type="checkbox"/> | <a href="#">1439</a> | 652.6865 | 1955.0377 |
| <input checked="" type="checkbox"/> | <a href="#">1440</a> | 652.6883 | 1955.0430 |
| <input checked="" type="checkbox"/> | <a href="#">1442</a> | 490.0197 | 1956.0499 |
| <input checked="" type="checkbox"/> | <a href="#">1443</a> | 490.0210 | 1956.0550 |
| <input checked="" type="checkbox"/> | <a href="#">1444</a> | 490.0218 | 1956.0583 |
| <input checked="" type="checkbox"/> | <a href="#">1445</a> | 653.6647 | 1957.9724 |
| <input checked="" type="checkbox"/> | <a href="#">1446</a> | 653.6665 | 1957.9777 |
| <input checked="" type="checkbox"/> | <a href="#">1447</a> | 656.3573 | 1966.0500 |
| <input checked="" type="checkbox"/> | <a href="#">1448</a> | 657.3424 | 1969.0054 |
| <input checked="" type="checkbox"/> | <a href="#">1449</a> | 659.3366 | 1974.9879 |
| <input checked="" type="checkbox"/> | <a href="#">1450</a> | 659.3366 | 1974.9881 |
| <input checked="" type="checkbox"/> | <a href="#">1451</a> | 659.3369 | 1974.9889 |
| <input checked="" type="checkbox"/> | <a href="#">1452</a> | 991.0228 | 1980.0311 |
| <input checked="" type="checkbox"/> | <a href="#">1453</a> | 991.0230 | 1980.0314 |
| <input checked="" type="checkbox"/> | <a href="#">1454</a> | 991.0233 | 1980.0321 |
| <input checked="" type="checkbox"/> | <a href="#">1455</a> | 661.0190 | 1980.0353 |
| <input checked="" type="checkbox"/> | <a href="#">1456</a> | 661.0195 | 1980.0365 |
| <input checked="" type="checkbox"/> | <a href="#">1457</a> | 661.3037 | 1980.8892 |
| <input checked="" type="checkbox"/> | <a href="#">1458</a> | 662.3105 | 1983.9098 |
| <input checked="" type="checkbox"/> | <a href="#">1459</a> | 498.2177 | 1988.8416 |
| <input checked="" type="checkbox"/> | <a href="#">1461</a> | 498.7541 | 1990.9874 |
| <input checked="" type="checkbox"/> | <a href="#">1462</a> | 664.6939 | 1991.0598 |
| <input checked="" type="checkbox"/> | <a href="#">1463</a> | 665.0493 | 1992.1262 |
| <input checked="" type="checkbox"/> | <a href="#">1464</a> | 665.3235 | 1992.9486 |
| <input checked="" type="checkbox"/> | <a href="#">1465</a> | 665.3252 | 1992.9537 |
| <input checked="" type="checkbox"/> | <a href="#">1466</a> | 665.3252 | 1992.9538 |
| <input checked="" type="checkbox"/> | <a href="#">1467</a> | 665.3295 | 1992.9667 |
| <input checked="" type="checkbox"/> | <a href="#">1468</a> | 502.7543 | 2006.9880 |
| <input checked="" type="checkbox"/> | <a href="#">1469</a> | 670.3053 | 2007.8942 |
| <input checked="" type="checkbox"/> | <a href="#">1470</a> | 671.0314 | 2010.0724 |
| <input checked="" type="checkbox"/> | <a href="#">1471</a> | 671.0316 | 2010.0730 |
| <input checked="" type="checkbox"/> | <a href="#">1472</a> | 671.0336 | 2010.0791 |
| <input checked="" type="checkbox"/> | <a href="#">1473</a> | 671.6754 | 2012.0043 |
| <input checked="" type="checkbox"/> | <a href="#">1474</a> | 671.6923 | 2012.0550 |

|                                     |                      |           |           |
|-------------------------------------|----------------------|-----------|-----------|
| <input checked="" type="checkbox"/> | <a href="#">1475</a> | 671.6924  | 2012.0553 |
| <input checked="" type="checkbox"/> | <a href="#">1476</a> | 673.3006  | 2016.8799 |
| <input checked="" type="checkbox"/> | <a href="#">1477</a> | 673.3007  | 2016.8804 |
| <input checked="" type="checkbox"/> | <a href="#">1478</a> | 673.9601  | 2018.8584 |
| <input checked="" type="checkbox"/> | <a href="#">1479</a> | 673.9968  | 2018.9686 |
| <input checked="" type="checkbox"/> | <a href="#">1480</a> | 673.9968  | 2018.9686 |
| <input checked="" type="checkbox"/> | <a href="#">1481</a> | 674.0292  | 2019.0657 |
| <input checked="" type="checkbox"/> | <a href="#">1482</a> | 676.6930  | 2027.0571 |
| <input checked="" type="checkbox"/> | <a href="#">1483</a> | 676.6930  | 2027.0573 |
| <input checked="" type="checkbox"/> | <a href="#">1485</a> | 679.7206  | 2036.1399 |
| <input checked="" type="checkbox"/> | <a href="#">1486</a> | 1019.0780 | 2036.1414 |
| <input checked="" type="checkbox"/> | <a href="#">1487</a> | 679.7216  | 2036.1430 |
| <input checked="" type="checkbox"/> | <a href="#">1488</a> | 679.7222  | 2036.1446 |
| <input checked="" type="checkbox"/> | <a href="#">1490</a> | 682.0242  | 2043.0507 |
| <input checked="" type="checkbox"/> | <a href="#">1492</a> | 683.3552  | 2047.0439 |
| <input checked="" type="checkbox"/> | <a href="#">1493</a> | 684.3319  | 2049.9738 |
| <input checked="" type="checkbox"/> | <a href="#">1494</a> | 684.3326  | 2049.9760 |
| <input checked="" type="checkbox"/> | <a href="#">1495</a> | 686.3319  | 2055.9739 |
| <input checked="" type="checkbox"/> | <a href="#">1496</a> | 686.3321  | 2055.9744 |
| <input checked="" type="checkbox"/> | <a href="#">1497</a> | 686.3323  | 2055.9749 |
| <input checked="" type="checkbox"/> | <a href="#">1498</a> | 687.9704  | 2060.8892 |
| <input checked="" type="checkbox"/> | <a href="#">1499</a> | 688.6441  | 2062.9106 |
| <input checked="" type="checkbox"/> | <a href="#">1500</a> | 1032.4626 | 2062.9106 |
| <input checked="" type="checkbox"/> | <a href="#">1501</a> | 688.6442  | 2062.9107 |
| <input checked="" type="checkbox"/> | <a href="#">1502</a> | 1032.4629 | 2062.9112 |
| <input checked="" type="checkbox"/> | <a href="#">1503</a> | 1032.4629 | 2062.9112 |
| <input checked="" type="checkbox"/> | <a href="#">1504</a> | 1032.4629 | 2062.9112 |
| <input checked="" type="checkbox"/> | <a href="#">1505</a> | 1032.4629 | 2062.9112 |
| <input checked="" type="checkbox"/> | <a href="#">1506</a> | 1032.4629 | 2062.9112 |
| <input checked="" type="checkbox"/> | <a href="#">1507</a> | 1032.4629 | 2062.9112 |
| <input checked="" type="checkbox"/> | <a href="#">1508</a> | 1032.4629 | 2062.9112 |
| <input checked="" type="checkbox"/> | <a href="#">1509</a> | 1032.4629 | 2062.9112 |
| <input checked="" type="checkbox"/> | <a href="#">1510</a> | 688.6450  | 2062.9131 |
| <input checked="" type="checkbox"/> | <a href="#">1511</a> | 1032.4728 | 2062.9311 |
| <input checked="" type="checkbox"/> | <a href="#">1512</a> | 1032.9616 | 2063.9085 |
| <input checked="" type="checkbox"/> | <a href="#">1513</a> | 1032.9619 | 2063.9092 |
| <input checked="" type="checkbox"/> | <a href="#">1515</a> | 690.0055  | 2066.9946 |
| <input checked="" type="checkbox"/> | <a href="#">1516</a> | 690.0501  | 2067.1285 |
| <input checked="" type="checkbox"/> | <a href="#">1517</a> | 690.0503  | 2067.1292 |
| <input checked="" type="checkbox"/> | <a href="#">1518</a> | 690.0508  | 2067.1306 |
| <input checked="" type="checkbox"/> | <a href="#">1520</a> | 691.6825  | 2072.0256 |
| <input checked="" type="checkbox"/> | <a href="#">1521</a> | 692.3076  | 2073.9009 |
| <input checked="" type="checkbox"/> | <a href="#">1522</a> | 1044.8037 | 2087.5928 |
| <input checked="" type="checkbox"/> | <a href="#">1523</a> | 697.0066  | 2087.9979 |
| <input checked="" type="checkbox"/> | <a href="#">1524</a> | 697.3596  | 2089.0570 |
| <input checked="" type="checkbox"/> | <a href="#">1525</a> | 702.6938  | 2105.0595 |
| <input checked="" type="checkbox"/> | <a href="#">1526</a> | 703.0339  | 2106.0798 |
| <input checked="" type="checkbox"/> | <a href="#">1527</a> | 528.2292  | 2108.8877 |
| <input checked="" type="checkbox"/> | <a href="#">1528</a> | 704.0121  | 2109.0146 |
| <input checked="" type="checkbox"/> | <a href="#">1529</a> | 705.3700  | 2113.0883 |
| <input checked="" type="checkbox"/> | <a href="#">1530</a> | 529.7118  | 2114.8181 |
| <input checked="" type="checkbox"/> | <a href="#">1531</a> | 529.9628  | 2115.8221 |
| <input checked="" type="checkbox"/> | <a href="#">1532</a> | 706.2830  | 2115.8273 |
| <input checked="" type="checkbox"/> | <a href="#">1533</a> | 711.0430  | 2130.1073 |
| <input checked="" type="checkbox"/> | <a href="#">1534</a> | 1067.4617 | 2132.9088 |
| <input checked="" type="checkbox"/> | <a href="#">1535</a> | 1067.8292 | 2133.6438 |
| <input checked="" type="checkbox"/> | <a href="#">1536</a> | 429.5344  | 2142.6355 |
| <input checked="" type="checkbox"/> | <a href="#">1537</a> | 715.3690  | 2143.0852 |
| <input checked="" type="checkbox"/> | <a href="#">1538</a> | 1073.5017 | 2144.9888 |
| <input checked="" type="checkbox"/> | <a href="#">1539</a> | 1073.5038 | 2144.9931 |
| <input checked="" type="checkbox"/> | <a href="#">1540</a> | 1073.5048 | 2144.9951 |
| <input checked="" type="checkbox"/> | <a href="#">1541</a> | 716.0069  | 2144.9988 |
| <input checked="" type="checkbox"/> | <a href="#">1542</a> | 716.0070  | 2144.9992 |
| <input checked="" type="checkbox"/> | <a href="#">1543</a> | 722.3372  | 2163.9898 |
| <input checked="" type="checkbox"/> | <a href="#">1544</a> | 722.3373  | 2163.9899 |
| <input checked="" type="checkbox"/> | <a href="#">1545</a> | 723.0171  | 2166.0295 |
| <input checked="" type="checkbox"/> | <a href="#">1546</a> | 723.0185  | 2166.0336 |
| <input checked="" type="checkbox"/> | <a href="#">1547</a> | 723.9955  | 2168.9647 |
| <input checked="" type="checkbox"/> | <a href="#">1548</a> | 724.6425  | 2170.9057 |
| <input checked="" type="checkbox"/> | <a href="#">1549</a> | 727.0202  | 2178.0389 |
| <input checked="" type="checkbox"/> | <a href="#">1550</a> | 727.0214  | 2178.0425 |
| <input checked="" type="checkbox"/> | <a href="#">1551</a> | 728.0101  | 2181.0084 |
| <input checked="" type="checkbox"/> | <a href="#">1552</a> | 728.3660  | 2182.0762 |
| <input checked="" type="checkbox"/> | <a href="#">1553</a> | 728.7156  | 2183.1249 |
| <input checked="" type="checkbox"/> | <a href="#">1554</a> | 728.7156  | 2183.1249 |
| <input checked="" type="checkbox"/> | <a href="#">1555</a> | 546.7891  | 2183.1273 |
| <input checked="" type="checkbox"/> | <a href="#">1556</a> | 546.7902  | 2183.1317 |
| <input checked="" type="checkbox"/> | <a href="#">1557</a> | 546.7905  | 2183.1329 |
| <input checked="" type="checkbox"/> | <a href="#">1558</a> | 547.0361  | 2184.1151 |
| <input checked="" type="checkbox"/> | <a href="#">1559</a> | 733.6444  | 2197.9113 |
| <input checked="" type="checkbox"/> | <a href="#">1560</a> | 551.0365  | 2200.1169 |
| <input checked="" type="checkbox"/> | <a href="#">1561</a> | 736.0521  | 2205.1344 |
| <input checked="" type="checkbox"/> | <a href="#">1562</a> | 737.3723  | 2209.0951 |
| <input checked="" type="checkbox"/> | <a href="#">1563</a> | 737.3723  | 2209.0951 |
| <input checked="" type="checkbox"/> | <a href="#">1565</a> | 738.0033  | 2210.9882 |
| <input checked="" type="checkbox"/> | <a href="#">1566</a> | 738.0033  | 2210.9882 |
| <input checked="" type="checkbox"/> | <a href="#">1567</a> | 740.3650  | 2218.0731 |
| <input checked="" type="checkbox"/> | <a href="#">1568</a> | 746.3448  | 2236.0127 |
| <input checked="" type="checkbox"/> | <a href="#">1569</a> | 747.0535  | 2238.1388 |
| <input checked="" type="checkbox"/> | <a href="#">1570</a> | 747.0537  | 2238.1393 |
| <input checked="" type="checkbox"/> | <a href="#">1571</a> | 747.1067  | 2238.2984 |
| <input checked="" type="checkbox"/> | <a href="#">1572</a> | 747.1067  | 2238.2984 |
| <input checked="" type="checkbox"/> | <a href="#">1573</a> | 747.7109  | 2240.1108 |
| <input checked="" type="checkbox"/> | <a href="#">1574</a> | 747.7118  | 2240.1137 |

|                                     |                      |          |           |
|-------------------------------------|----------------------|----------|-----------|
| <input checked="" type="checkbox"/> | <a href="#">1575</a> | 747.7119 | 2240.1138 |
| <input checked="" type="checkbox"/> | <a href="#">1576</a> | 561.0451 | 2240.1513 |
| <input checked="" type="checkbox"/> | <a href="#">1577</a> | 561.2924 | 2241.1404 |
| <input checked="" type="checkbox"/> | <a href="#">1578</a> | 749.6908 | 2246.0505 |
| <input checked="" type="checkbox"/> | <a href="#">1579</a> | 752.0435 | 2253.1086 |
| <input checked="" type="checkbox"/> | <a href="#">1580</a> | 752.3850 | 2254.1331 |
| <input checked="" type="checkbox"/> | <a href="#">1581</a> | 752.3855 | 2254.1348 |
| <input checked="" type="checkbox"/> | <a href="#">1582</a> | 565.2932 | 2257.1439 |
| <input checked="" type="checkbox"/> | <a href="#">1583</a> | 757.4111 | 2269.2115 |
| <input checked="" type="checkbox"/> | <a href="#">1584</a> | 757.4119 | 2269.2138 |
| <input checked="" type="checkbox"/> | <a href="#">1585</a> | 757.4120 | 2269.2142 |
| <input checked="" type="checkbox"/> | <a href="#">1586</a> | 758.7091 | 2273.1055 |
| <input checked="" type="checkbox"/> | <a href="#">1587</a> | 759.0516 | 2274.1329 |
| <input checked="" type="checkbox"/> | <a href="#">1588</a> | 760.7519 | 2279.2339 |
| <input checked="" type="checkbox"/> | <a href="#">1589</a> | 761.0583 | 2280.1530 |
| <input checked="" type="checkbox"/> | <a href="#">1590</a> | 763.2913 | 2286.8522 |
| <input checked="" type="checkbox"/> | <a href="#">1591</a> | 763.6328 | 2287.8766 |
| <input checked="" type="checkbox"/> | <a href="#">1592</a> | 573.7700 | 2291.0508 |
| <input checked="" type="checkbox"/> | <a href="#">1593</a> | 765.3476 | 2293.0210 |
| <input checked="" type="checkbox"/> | <a href="#">1594</a> | 574.2632 | 2293.0238 |
| <input checked="" type="checkbox"/> | <a href="#">1595</a> | 766.0177 | 2295.0313 |
| <input checked="" type="checkbox"/> | <a href="#">1596</a> | 771.3930 | 2311.1571 |
| <input checked="" type="checkbox"/> | <a href="#">1597</a> | 776.4114 | 2326.2123 |
| <input checked="" type="checkbox"/> | <a href="#">1598</a> | 778.7493 | 2333.2261 |
| <input checked="" type="checkbox"/> | <a href="#">1599</a> | 585.3036 | 2337.1853 |
| <input checked="" type="checkbox"/> | <a href="#">1600</a> | 588.7378 | 2350.9222 |
| <input checked="" type="checkbox"/> | <a href="#">1601</a> | 786.0408 | 2355.1006 |
| <input checked="" type="checkbox"/> | <a href="#">1603</a> | 786.0412 | 2355.1019 |
| <input checked="" type="checkbox"/> | <a href="#">1604</a> | 789.3988 | 2365.1745 |
| <input checked="" type="checkbox"/> | <a href="#">1605</a> | 789.7088 | 2366.1046 |
| <input checked="" type="checkbox"/> | <a href="#">1606</a> | 594.8181 | 2375.2432 |
| <input checked="" type="checkbox"/> | <a href="#">1607</a> | 796.0400 | 2385.0982 |
| <input checked="" type="checkbox"/> | <a href="#">1608</a> | 798.0501 | 2391.1285 |
| <input checked="" type="checkbox"/> | <a href="#">1609</a> | 603.0094 | 2408.0085 |
| <input checked="" type="checkbox"/> | <a href="#">1610</a> | 610.2985 | 2437.1650 |
| <input checked="" type="checkbox"/> | <a href="#">1611</a> | 610.2985 | 2437.1650 |
| <input checked="" type="checkbox"/> | <a href="#">1612</a> | 614.2993 | 2453.1680 |
| <input checked="" type="checkbox"/> | <a href="#">1613</a> | 616.0615 | 2460.2169 |
| <input checked="" type="checkbox"/> | <a href="#">1614</a> | 616.7779 | 2463.0824 |
| <input checked="" type="checkbox"/> | <a href="#">1615</a> | 620.0609 | 2476.2145 |
| <input checked="" type="checkbox"/> | <a href="#">1616</a> | 620.0609 | 2476.2145 |
| <input checked="" type="checkbox"/> | <a href="#">1617</a> | 826.7232 | 2477.1477 |
| <input checked="" type="checkbox"/> | <a href="#">1618</a> | 826.7232 | 2477.1479 |
| <input checked="" type="checkbox"/> | <a href="#">1619</a> | 832.1052 | 2493.2939 |
| <input checked="" type="checkbox"/> | <a href="#">1620</a> | 624.8076 | 2495.2015 |
| <input checked="" type="checkbox"/> | <a href="#">1621</a> | 833.0740 | 2496.2002 |
| <input checked="" type="checkbox"/> | <a href="#">1622</a> | 834.3963 | 2500.1671 |
| <input checked="" type="checkbox"/> | <a href="#">1623</a> | 834.4122 | 2500.2147 |
| <input checked="" type="checkbox"/> | <a href="#">1624</a> | 836.0714 | 2505.1923 |
| <input checked="" type="checkbox"/> | <a href="#">1625</a> | 836.0717 | 2505.1932 |
| <input checked="" type="checkbox"/> | <a href="#">1626</a> | 836.9826 | 2507.9259 |
| <input checked="" type="checkbox"/> | <a href="#">1627</a> | 837.0756 | 2508.2049 |
| <input checked="" type="checkbox"/> | <a href="#">1628</a> | 628.3578 | 2509.4019 |
| <input checked="" type="checkbox"/> | <a href="#">1629</a> | 838.4076 | 2512.2011 |
| <input checked="" type="checkbox"/> | <a href="#">1630</a> | 838.4077 | 2512.2012 |
| <input checked="" type="checkbox"/> | <a href="#">1631</a> | 842.0813 | 2523.2221 |
| <input checked="" type="checkbox"/> | <a href="#">1632</a> | 842.0823 | 2523.2250 |
| <input checked="" type="checkbox"/> | <a href="#">1633</a> | 634.3157 | 2533.2336 |
| <input checked="" type="checkbox"/> | <a href="#">1634</a> | 634.3164 | 2533.2366 |
| <input checked="" type="checkbox"/> | <a href="#">1635</a> | 634.3166 | 2533.2371 |
| <input checked="" type="checkbox"/> | <a href="#">1637</a> | 845.7318 | 2534.1734 |
| <input checked="" type="checkbox"/> | <a href="#">1638</a> | 849.7527 | 2546.2362 |
| <input checked="" type="checkbox"/> | <a href="#">1639</a> | 849.7961 | 2546.3663 |
| <input checked="" type="checkbox"/> | <a href="#">1640</a> | 850.1328 | 2547.3766 |
| <input checked="" type="checkbox"/> | <a href="#">1641</a> | 638.3128 | 2549.2222 |
| <input checked="" type="checkbox"/> | <a href="#">1642</a> | 640.8077 | 2559.2017 |
| <input checked="" type="checkbox"/> | <a href="#">1643</a> | 858.4120 | 2572.2141 |
| <input checked="" type="checkbox"/> | <a href="#">1644</a> | 869.1430 | 2604.4071 |
| <input checked="" type="checkbox"/> | <a href="#">1645</a> | 869.1447 | 2604.4122 |
| <input checked="" type="checkbox"/> | <a href="#">1646</a> | 871.7517 | 2612.2332 |
| <input checked="" type="checkbox"/> | <a href="#">1649</a> | 654.0679 | 2612.2425 |
| <input checked="" type="checkbox"/> | <a href="#">1650</a> | 654.0679 | 2612.2425 |
| <input checked="" type="checkbox"/> | <a href="#">1652</a> | 654.0679 | 2612.2425 |
| <input checked="" type="checkbox"/> | <a href="#">1653</a> | 654.0679 | 2612.2425 |
| <input checked="" type="checkbox"/> | <a href="#">1654</a> | 654.3134 | 2613.2246 |
| <input checked="" type="checkbox"/> | <a href="#">1655</a> | 657.0540 | 2624.1870 |
| <input checked="" type="checkbox"/> | <a href="#">1656</a> | 888.1503 | 2661.4291 |
| <input checked="" type="checkbox"/> | <a href="#">1657</a> | 668.5512 | 2670.1757 |
| <input checked="" type="checkbox"/> | <a href="#">1658</a> | 668.5513 | 2670.1761 |
| <input checked="" type="checkbox"/> | <a href="#">1659</a> | 668.5514 | 2670.1766 |
| <input checked="" type="checkbox"/> | <a href="#">1660</a> | 672.5762 | 2686.2756 |
| <input checked="" type="checkbox"/> | <a href="#">1661</a> | 541.5694 | 2702.8106 |
| <input checked="" type="checkbox"/> | <a href="#">1662</a> | 902.4244 | 2704.2513 |
| <input checked="" type="checkbox"/> | <a href="#">1663</a> | 904.4239 | 2710.2499 |
| <input checked="" type="checkbox"/> | <a href="#">1664</a> | 904.7652 | 2711.2739 |
| <input checked="" type="checkbox"/> | <a href="#">1665</a> | 682.8056 | 2727.1933 |
| <input checked="" type="checkbox"/> | <a href="#">1666</a> | 682.8057 | 2727.1938 |
| <input checked="" type="checkbox"/> | <a href="#">1667</a> | 684.3189 | 2733.2464 |
| <input checked="" type="checkbox"/> | <a href="#">1668</a> | 690.2942 | 2757.1475 |
| <input checked="" type="checkbox"/> | <a href="#">1669</a> | 923.1093 | 2766.3061 |
| <input checked="" type="checkbox"/> | <a href="#">1670</a> | 693.2914 | 2769.1363 |
| <input checked="" type="checkbox"/> | <a href="#">1676</a> | 961.8133 | 2882.4179 |
| <input checked="" type="checkbox"/> | <a href="#">1677</a> | 734.8674 | 2935.4405 |
| <input checked="" type="checkbox"/> | <a href="#">1679</a> | 734.8698 | 2935.4502 |

|                                     |                      |           |           |
|-------------------------------------|----------------------|-----------|-----------|
| <input checked="" type="checkbox"/> | <a href="#">1680</a> | 980.1579  | 2937.4519 |
| <input checked="" type="checkbox"/> | <a href="#">1681</a> | 748.0944  | 2988.3486 |
| <input checked="" type="checkbox"/> | <a href="#">1682</a> | 770.1953  | 3076.7522 |
| <input checked="" type="checkbox"/> | <a href="#">1683</a> | 774.5428  | 3094.1423 |
| <input checked="" type="checkbox"/> | <a href="#">1684</a> | 1044.8027 | 3131.3862 |
| <input checked="" type="checkbox"/> | <a href="#">1686</a> | 807.9072  | 3227.5996 |
| <input checked="" type="checkbox"/> | <a href="#">1687</a> | 818.1549  | 3268.5907 |
| <input checked="" type="checkbox"/> | <a href="#">1688</a> | 833.3865  | 3329.5171 |
| <input checked="" type="checkbox"/> | <a href="#">1689</a> | 834.1223  | 3332.4603 |
| <input checked="" type="checkbox"/> | <a href="#">1690</a> | 838.1867  | 3348.7179 |
| <input checked="" type="checkbox"/> | <a href="#">1691</a> | 862.6314  | 3446.4963 |
| <input checked="" type="checkbox"/> | <a href="#">1692</a> | 597.1167  | 3576.6567 |
| <input checked="" type="checkbox"/> | <a href="#">1693</a> | 911.6700  | 3642.6508 |
| <input checked="" type="checkbox"/> | <a href="#">1694</a> | 911.6700  | 3642.6508 |
| <input checked="" type="checkbox"/> | <a href="#">1695</a> | 525.7616  | 3673.2799 |
| <input checked="" type="checkbox"/> | <a href="#">1696</a> | 925.9234  | 3699.6646 |
| <input checked="" type="checkbox"/> | <a href="#">1697</a> | 925.9237  | 3699.6657 |
| <input checked="" type="checkbox"/> | <a href="#">1698</a> | 636.6457  | 3813.8306 |
| <input checked="" type="checkbox"/> | <a href="#">1699</a> | 658.2039  | 3943.1800 |
| <input checked="" type="checkbox"/> | <a href="#">1700</a> | 702.3605  | 4208.1190 |
| <input checked="" type="checkbox"/> | <a href="#">1701</a> | 658.0546  | 4599.3313 |
| <input checked="" type="checkbox"/> | <a href="#">1702</a> | 621.4548  | 4963.5804 |

## Search Parameters

Type of search : MS/MS Ion Search  
Enzyme : Trypsin  
Variable modifications : [Carbamidomethyl \(C\)](#), [Oxidation \(M\)](#)  
Mass values : Monoisotopic  
Protein Mass : Unrestricted  
Peptide Mass Tolerance :  $\pm 50$  ppm  
Fragment Mass Tolerance:  $\pm 0.6$  Da  
Max Missed Cleavages : 1  
Instrument type : ESI-QUAD-TOF  
Number of queries : 1702

Mascot: <http://www.matrixscience.com/>



## **S4 Fig MASCOT Search Results – SEC Sample**

**MASCOT SCIENCE Mascot Search Results**

```

User :
Email :
Search title : Submitted from Sheep Rerun-2 by Mascot Daemon on APAF-WS-08
MS data file : \\apaf-hpv-file\projects\External\e_17906_VUW_SandiDempsey_20150615\1_MassSpec\5600\Run2\RawData\150713_P17906_SD97-1_1.MGF
Database : sp_sheep_140625_sheep_140625_ (647 sequences; 258179 residues)
Timestamp : 13 Jul 2015 at 22:49:26 GMT
Protein hits :
Q9BGM5 sp|Q9BGM5|K1C25_SHEEP Keratin, type I cytoskeletal 25 OS=Ovis aries GN=KRT25 PE=2 SV=1
Q9TTE2 sp|Q9TTE2|PGS2_SHEEP Decorin OS=Ovis aries GN=DCN PE=2 SV=1
Q28554 sp|Q28554|G3P_SHEEP Glyceraldehyde-3-phosphate dehydrogenase (Fragment) OS=Ovis aries GN=GAPDH PE=2 SV=4
P60713 sp|P60713|ACTB_SHEEP Actin, cytoplasmic 1 OS=Ovis aries GN=ACTB PE=2 SV=1
Q6B7M7 sp|Q6B7M7|COF1_SHEEP Cofilin-1 OS=Ovis aries GN=CFL1 PE=2 SV=3
    
```

sp\_sheep\_140625 [Decoy](#) False discovery rate

Peptide matches above identity threshold 6 1 16.67 %  
 Peptide matches above homology or identity threshold 6 1 16.67 %

**Mascot Score Histogram**

Ions score is  $-10 \cdot \log(P)$ , where P is the probability that the observed match is a random event. Individual ions scores > 12 indicate identity or extensive homology (p<0.05). Protein scores are derived from ions scores as a non-probabilistic basis for ranking protein hits.

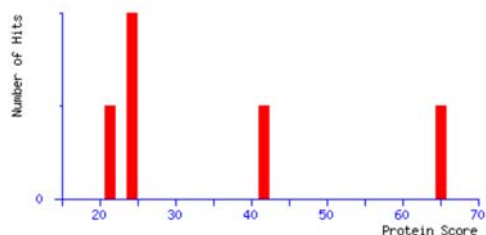

**Peptide Summary Report**

Format As Peptide Summary [Help](#)  
 Significance threshold p< 0.05 Max. number of hits AUTO Show Percolator scores   
 Standard scoring  MudPIT scoring  Ions score or expect cut-off 12 Show sub-sets 0  
 Show pop-ups  Suppress pop-ups  Sort unassigned Decreasing Score Require bold red

Select All Select None Search Selected  Error tolerant Archive Report

1. [Q9BGM5](#) Mass: 49282 Score: 65 Matches: 2(2) Sequences: 2(2) emPAI: 0.14  
 sp|Q9BGM5|K1C25\_SHEEP Keratin, type I cytoskeletal 25 OS=Ovis aries GN=KRT25 PE=2 SV=1  
 Check to include this hit in error tolerant search or archive report

| Query                                                   | Observed | Mr(expt)  | Mr(calc)  | ppm  | Miss Score | Expect | Rank     | Unique | Peptide         |
|---------------------------------------------------------|----------|-----------|-----------|------|------------|--------|----------|--------|-----------------|
| <input checked="" type="checkbox"/> <a href="#">152</a> | 355.5414 | 1063.6023 | 1063.5662 | 33.9 | 0          | 56     | 2.4e-006 | 1      | U R.LASYLENVR.A |
| <input checked="" type="checkbox"/> <a href="#">173</a> | 555.2561 | 1108.4977 | 1108.4825 | 13.7 | 0          | 24     | 0.012    | 1      | U R.DAEAWFNEK.S |

2. [Q9TTE2](#) Mass: 39947 Score: 42 Matches: 1(1) Sequences: 1(1) emPAI: 0.08  
 sp|Q9TTE2|PGS2\_SHEEP Decorin OS=Ovis aries GN=DCN PE=2 SV=1  
 Check to include this hit in error tolerant search or archive report

| Query                                                   | Observed | Mr(expt)  | Mr(calc)  | ppm  | Miss Score | Expect | Rank    | Unique | Peptide                                 |
|---------------------------------------------------------|----------|-----------|-----------|------|------------|--------|---------|--------|-----------------------------------------|
| <input checked="" type="checkbox"/> <a href="#">356</a> | 624.3236 | 1246.6327 | 1246.6227 | 7.99 | 0          | 42     | 0.00015 | 1      | U R.VVQCSDLGLEK.V + Carbamidomethyl (C) |

3. [Q28554](#) Mass: 34710 Score: 25 Matches: 1(1) Sequences: 1(1) emPAI: 0.10  
 sp|Q28554|G3P\_SHEEP Glyceraldehyde-3-phosphate dehydrogenase (Fragment) OS=Ovis aries GN=GAPDH PE=2 SV=4  
 Check to include this hit in error tolerant search or archive report

| Query                                                   | Observed | Mr(expt)  | Mr(calc)  | ppm  | Miss Score | Expect | Rank   | Unique | Peptide               |
|---------------------------------------------------------|----------|-----------|-----------|------|------------|--------|--------|--------|-----------------------|
| <input checked="" type="checkbox"/> <a href="#">438</a> | 685.3836 | 1368.7527 | 1368.7361 | 12.1 | 0          | 25     | 0.0034 | 1      | U R.GAAQNIIPASTGAAK.A |

4. [P60713](#) Mass: 41710 Score: 24 Matches: 1(1) Sequences: 1(1) emPAI: 0.08  
 sp|P60713|ACTB\_SHEEP Actin, cytoplasmic 1 OS=Ovis aries GN=ACTB PE=2 SV=1  
 Check to include this hit in error tolerant search or archive report

| Query                                                   | Observed | Mr(expt)  | Mr(calc)  | ppm  | Miss Score | Expect | Rank   | Unique | Peptide                           |
|---------------------------------------------------------|----------|-----------|-----------|------|------------|--------|--------|--------|-----------------------------------|
| <input checked="" type="checkbox"/> <a href="#">252</a> | 589.3136 | 1176.6126 | 1176.6060 | 5.60 | 0          | 24     | 0.0078 | 1      | U K.EITALAPSTMK.I + Oxidation (M) |

5. [Q6B7M7](#) Mass: 18507 Score: 21 Matches: 1(1) Sequences: 1(1) emPAI: 0.18  
 sp|Q6B7M7|COF1\_SHEEP Cofilin-1 OS=Ovis aries GN=CFL1 PE=2 SV=3  
 Check to include this hit in error tolerant search or archive report

| Query                                                   | Observed | Mr(expt)  | Mr(calc)  | ppm  | Miss Score | Expect | Rank  | Unique | Peptide           |
|---------------------------------------------------------|----------|-----------|-----------|------|------------|--------|-------|--------|-------------------|
| <input checked="" type="checkbox"/> <a href="#">429</a> | 669.3204 | 1336.6263 | 1336.6187 | 5.72 | 0          | 21     | 0.013 | 1      | U R.YALYDATYETK.E |

Peptide matches not assigned to protein hits: (no details means no match)

| Query                 | Observed | Mr(expt)  | Mr(calc)  | ppm    | Miss | Score | Expect | Rank | Unique | Peptide                             |
|-----------------------|----------|-----------|-----------|--------|------|-------|--------|------|--------|-------------------------------------|
| ✓ <a href="#">107</a> | 464.2733 | 926.5319  | 926.5450  | -14.10 | 1    | 12    | 0.064  | 1    |        | KHFLQVR                             |
| ✓ <a href="#">224</a> | 579.8401 | 1157.6657 | 1157.6404 | 21.9   | 1    | 12    | 0.069  | 1    |        | DSGRALAEVLK                         |
| ✓ <a href="#">119</a> | 487.2704 | 972.5262  | 972.4876  | 39.7   | 0    | 11    | 0.074  | 1    |        | LLEGEEQR                            |
| ✓ <a href="#">183</a> | 559.8208 | 1117.6270 | 1117.6132 | 12.4   | 0    | 10    | 0.096  | 1    |        | TALSVVTWVK                          |
| ✓ <a href="#">389</a> | 635.3687 | 1268.7229 | 1268.6837 | 30.9   | 1    | 10    | 0.11   | 1    |        | ASELARAEGIPR                        |
| ✓ <a href="#">413</a> | 653.3311 | 1304.6477 | 1304.7088 | -46.83 | 0    | 8     | 0.41   | 1    |        | HLVDEPQNLIK                         |
| ✓ <a href="#">451</a> | 706.8388 | 1411.6631 | 1411.6337 | 20.8   | 1    | 7     | 0.2    | 1    |        | SRGIVEECCFR + 2 Carbamidomethyl (C) |
| ✓ <a href="#">52</a>  | 428.7669 | 855.5193  | 855.4926  | 31.1   | 1    | 6     | 0.25   | 1    |        | LRISPDR                             |
| ✓ <a href="#">176</a> | 556.8353 | 2223.3123 | 2223.2773 | 15.7   | 1    | 5     | 0.3    | 1    |        | IGCTPVLVLSGLDTRIQALVR               |
| ✓ <a href="#">145</a> | 523.2867 | 1044.5589 | 1044.5862 | -26.18 | 1    | 5     | 0.31   | 1    |        | LSRLQCLR + Carbamidomethyl (C)      |
| ✓ <a href="#">156</a> | 537.7639 | 1073.5133 | 1073.4699 | 40.4   | 0    | 5     | 0.32   | 1    |        | QESEPPMK                            |
| ✓ <a href="#">390</a> | 637.3201 | 1272.6257 | 1272.6826 | -44.72 | 1    | 5     | 0.38   | 1    |        | GHLTYLAKENK                         |
| ✓ <a href="#">89</a>  | 450.7640 | 899.5134  | 899.5188  | -6.00  | 1    | 4     | 0.56   | 1    |        | QVLEAGKR                            |
| ✓ <a href="#">291</a> | 601.8473 | 1201.6800 | 1201.6853 | -4.40  | 1    | 3     | 1.1    | 1    |        | KLLSMIGGVER                         |
| ✓ <a href="#">230</a> | 580.8443 | 1159.6741 | 1159.6271 | 40.6   | 1    | 3     | 0.54   | 1    |        | CVVLAEDKVK + Carbamidomethyl (C)    |
| ✓ <a href="#">538</a> | 963.9523 | 1925.8900 | 1925.8822 | 4.02   | 1    | 2     | 0.88   | 1    |        | MDSQMTKQALNEIETR + 2 Oxidation (M)  |
| ✓ <a href="#">289</a> | 601.3000 | 1200.5854 | 1200.6098 | -20.39 | 0    | 2     | 1.4    | 1    |        | QSVLEADINGLR                        |
| ✓ <a href="#">222</a> | 579.3103 | 1156.6060 | 1156.6200 | -12.09 | 1    | 2     | 0.7    | 1    |        | QEEVLQKR                            |
| ✓ <a href="#">229</a> | 580.8438 | 1159.6730 | 1159.6271 | 39.6   | 1    | 2     | 0.65   | 1    |        | CVVLAEDKVK + Carbamidomethyl (C)    |
| ✓ <a href="#">120</a> | 558.8259 | 1115.6373 | 1115.5836 | 48.1   | 1    | 2     | 0.65   | 1    |        | GWLDTVRNR                           |
| ✓ <a href="#">179</a> | 558.8259 | 1115.6373 | 1115.5836 | 48.1   | 1    | 2     | 0.66   | 1    |        | GWLDTVRNR                           |
| ✓ <a href="#">276</a> | 595.8478 | 1189.6811 | 1189.6489 | 27.1   | 0    | 2     | 0.66   | 1    |        | TVSALMVGLQR + Oxidation (M)         |
| ✓ <a href="#">284</a> | 598.9487 | 1793.8244 | 1793.7924 | 17.8   | 0    | 2     | 0.68   | 1    |        | DGMQEEAIQEIAGMTR + Oxidation (M)    |
| ✓ <a href="#">120</a> | 494.2295 | 986.5845  | 986.5661  | 18.6   | 1    | 1     | 0.88   | 1    |        | TAVWVQRK                            |
| ✓ <a href="#">228</a> | 580.8422 | 1159.6698 | 1159.6271 | 36.8   | 1    | 1     | 0.8    | 1    |        | CVVLAEDKVK + Carbamidomethyl (C)    |
| ✓ <a href="#">223</a> | 579.8370 | 1157.6595 | 1157.6404 | 16.5   | 1    | 1     | 0.82   | 1    |        | DSGRALAEVLK                         |
| ✓ <a href="#">108</a> | 464.7770 | 927.5395  | 927.5072  | 34.8   | 0    | 1     | 0.93   | 1    |        | CVQRPLR + Carbamidomethyl (C)       |
| ✓ <a href="#">210</a> | 573.3356 | 1144.6566 | 1144.6029 | 46.9   | 1    | 0     | 0.91   | 1    |        | VEGWVWKNK                           |
| ✓ <a href="#">51</a>  | 428.7669 | 855.5193  | 855.5542  | -40.79 | 1    | 0     | 0.93   | 1    |        | LLDRLVK                             |
| ✓ <a href="#">361</a> | 625.3611 | 1248.7076 | 1248.7077 | -0.13  | 1    | 0     | 0.96   | 1    |        | ATVEALINKYK                         |
| ✓ <a href="#">50</a>  | 428.7668 | 855.5191  | 855.5542  | -40.98 | 1    | 0     | 0.97   | 1    |        | LLDRLVK                             |
| ✓ <a href="#">141</a> | 519.2663 | 1554.7772 | 1554.7435 | 21.6   | 1    | 0     | 2.6    | 1    |        | EIVCFQGFRTPCR                       |
| ✓ <a href="#">160</a> | 543.3153 | 1084.6160 | 1084.5989 | 15.8   | 1    | 0     | 1      | 1    |        | DEARVLQVR                           |
| ✓ <a href="#">1</a>   | 360.2056 | 718.3965  |           |        |      |       |        |      |        |                                     |
| ✓ <a href="#">2</a>   | 362.2206 | 722.4266  |           |        |      |       |        |      |        |                                     |
| ✓ <a href="#">3</a>   | 362.2212 | 722.4279  |           |        |      |       |        |      |        |                                     |
| ✓ <a href="#">4</a>   | 382.2200 | 762.4254  |           |        |      |       |        |      |        |                                     |
| ✓ <a href="#">5</a>   | 382.2230 | 762.4314  |           |        |      |       |        |      |        |                                     |
| ✓ <a href="#">6</a>   | 384.2343 | 766.4540  |           |        |      |       |        |      |        |                                     |
| ✓ <a href="#">7</a>   | 384.2356 | 766.4566  |           |        |      |       |        |      |        |                                     |
| ✓ <a href="#">8</a>   | 404.2325 | 806.4505  |           |        |      |       |        |      |        |                                     |
| ✓ <a href="#">9</a>   | 406.2473 | 810.4801  |           |        |      |       |        |      |        |                                     |
| ✓ <a href="#">10</a>  | 406.2483 | 810.4820  |           |        |      |       |        |      |        |                                     |
| ✓ <a href="#">11</a>  | 412.7521 | 823.4896  |           |        |      |       |        |      |        |                                     |
| ✓ <a href="#">12</a>  | 412.7533 | 823.4920  |           |        |      |       |        |      |        |                                     |
| ✓ <a href="#">13</a>  | 412.7533 | 823.4920  |           |        |      |       |        |      |        |                                     |
| ✓ <a href="#">14</a>  | 412.7544 | 823.4942  |           |        |      |       |        |      |        |                                     |
| ✓ <a href="#">15</a>  | 414.2448 | 826.4751  |           |        |      |       |        |      |        |                                     |
| ✓ <a href="#">16</a>  | 416.2269 | 830.4393  |           |        |      |       |        |      |        |                                     |
| ✓ <a href="#">17</a>  | 416.2495 | 830.4845  |           |        |      |       |        |      |        |                                     |
| ✓ <a href="#">18</a>  | 420.4436 | 838.8727  |           |        |      |       |        |      |        |                                     |
| ✓ <a href="#">19</a>  | 420.4436 | 838.8727  |           |        |      |       |        |      |        |                                     |
| ✓ <a href="#">20</a>  | 421.7571 | 841.4996  |           |        |      |       |        |      |        |                                     |
| ✓ <a href="#">21</a>  | 421.7580 | 841.5015  |           |        |      |       |        |      |        |                                     |
| ✓ <a href="#">22</a>  | 421.7582 | 841.5018  |           |        |      |       |        |      |        |                                     |
| ✓ <a href="#">23</a>  | 421.7582 | 841.5019  |           |        |      |       |        |      |        |                                     |
| ✓ <a href="#">24</a>  | 421.7583 | 841.5020  |           |        |      |       |        |      |        |                                     |
| ✓ <a href="#">25</a>  | 421.7583 | 841.5020  |           |        |      |       |        |      |        |                                     |
| ✓ <a href="#">26</a>  | 421.7584 | 841.5023  |           |        |      |       |        |      |        |                                     |
| ✓ <a href="#">27</a>  | 421.7585 | 841.5024  |           |        |      |       |        |      |        |                                     |
| ✓ <a href="#">28</a>  | 421.7586 | 841.5026  |           |        |      |       |        |      |        |                                     |
| ✓ <a href="#">29</a>  | 421.7587 | 841.5028  |           |        |      |       |        |      |        |                                     |
| ✓ <a href="#">30</a>  | 421.7587 | 841.5028  |           |        |      |       |        |      |        |                                     |
| ✓ <a href="#">31</a>  | 421.7587 | 841.5028  |           |        |      |       |        |      |        |                                     |
| ✓ <a href="#">32</a>  | 421.7588 | 841.5030  |           |        |      |       |        |      |        |                                     |
| ✓ <a href="#">33</a>  | 421.7589 | 841.5032  |           |        |      |       |        |      |        |                                     |
| ✓ <a href="#">34</a>  | 421.7590 | 841.5034  |           |        |      |       |        |      |        |                                     |
| ✓ <a href="#">35</a>  | 426.2478 | 850.4810  |           |        |      |       |        |      |        |                                     |
| ✓ <a href="#">36</a>  | 427.4293 | 852.8440  |           |        |      |       |        |      |        |                                     |
| ✓ <a href="#">37</a>  | 428.2450 | 854.4754  |           |        |      |       |        |      |        |                                     |
| ✓ <a href="#">38</a>  | 428.2459 | 854.4772  |           |        |      |       |        |      |        |                                     |
| ✓ <a href="#">39</a>  | 428.2464 | 854.4782  |           |        |      |       |        |      |        |                                     |
| ✓ <a href="#">40</a>  | 428.2471 | 854.4797  |           |        |      |       |        |      |        |                                     |
| ✓ <a href="#">41</a>  | 428.2475 | 854.4805  |           |        |      |       |        |      |        |                                     |
| ✓ <a href="#">42</a>  | 428.2480 | 854.4815  |           |        |      |       |        |      |        |                                     |
| ✓ <a href="#">43</a>  | 428.2520 | 854.4895  |           |        |      |       |        |      |        |                                     |
| ✓ <a href="#">44</a>  | 428.2618 | 854.5091  |           |        |      |       |        |      |        |                                     |
| ✓ <a href="#">45</a>  | 428.2622 | 854.5098  |           |        |      |       |        |      |        |                                     |
| ✓ <a href="#">46</a>  | 428.7654 | 855.5162  |           |        |      |       |        |      |        |                                     |
| ✓ <a href="#">47</a>  | 428.7656 | 855.5166  |           |        |      |       |        |      |        |                                     |
| ✓ <a href="#">48</a>  | 428.7656 | 855.5166  |           |        |      |       |        |      |        |                                     |
| ✓ <a href="#">49</a>  | 428.7668 | 855.5191  |           |        |      |       |        |      |        |                                     |
| ✓ <a href="#">53</a>  | 428.7670 | 855.5195  |           |        |      |       |        |      |        |                                     |
| ✓ <a href="#">54</a>  | 429.2380 | 856.4614  |           |        |      |       |        |      |        |                                     |
| ✓ <a href="#">55</a>  | 434.4142 | 866.8138  |           |        |      |       |        |      |        |                                     |
| ✓ <a href="#">56</a>  | 434.7681 | 867.5216  |           |        |      |       |        |      |        |                                     |

|                                     |                     |          |           |
|-------------------------------------|---------------------|----------|-----------|
| <input checked="" type="checkbox"/> | <a href="#">57</a>  | 435.2574 | 868.5002  |
| <input checked="" type="checkbox"/> | <a href="#">58</a>  | 435.2592 | 868.5038  |
| <input checked="" type="checkbox"/> | <a href="#">59</a>  | 435.7562 | 869.4978  |
| <input checked="" type="checkbox"/> | <a href="#">60</a>  | 435.7736 | 869.5327  |
| <input checked="" type="checkbox"/> | <a href="#">61</a>  | 435.7738 | 869.5331  |
| <input checked="" type="checkbox"/> | <a href="#">62</a>  | 435.7741 | 869.5337  |
| <input checked="" type="checkbox"/> | <a href="#">63</a>  | 435.7745 | 869.5344  |
| <input checked="" type="checkbox"/> | <a href="#">64</a>  | 435.7745 | 869.5344  |
| <input checked="" type="checkbox"/> | <a href="#">65</a>  | 435.7747 | 869.5349  |
| <input checked="" type="checkbox"/> | <a href="#">66</a>  | 435.7747 | 869.5349  |
| <input checked="" type="checkbox"/> | <a href="#">67</a>  | 435.7748 | 869.5351  |
| <input checked="" type="checkbox"/> | <a href="#">68</a>  | 437.2350 | 872.4554  |
| <input checked="" type="checkbox"/> | <a href="#">69</a>  | 441.2628 | 880.5111  |
| <input checked="" type="checkbox"/> | <a href="#">70</a>  | 442.2643 | 882.5141  |
| <input checked="" type="checkbox"/> | <a href="#">71</a>  | 442.5896 | 883.1647  |
| <input checked="" type="checkbox"/> | <a href="#">72</a>  | 442.7629 | 883.5112  |
| <input checked="" type="checkbox"/> | <a href="#">73</a>  | 448.2583 | 894.5020  |
| <input checked="" type="checkbox"/> | <a href="#">74</a>  | 448.8663 | 895.7180  |
| <input checked="" type="checkbox"/> | <a href="#">75</a>  | 449.7724 | 897.5302  |
| <input checked="" type="checkbox"/> | <a href="#">76</a>  | 450.2695 | 898.5245  |
| <input checked="" type="checkbox"/> | <a href="#">77</a>  | 450.2696 | 898.5247  |
| <input checked="" type="checkbox"/> | <a href="#">78</a>  | 450.2699 | 898.5252  |
| <input checked="" type="checkbox"/> | <a href="#">79</a>  | 450.2699 | 898.5252  |
| <input checked="" type="checkbox"/> | <a href="#">80</a>  | 450.2700 | 898.5254  |
| <input checked="" type="checkbox"/> | <a href="#">81</a>  | 450.2710 | 898.5275  |
| <input checked="" type="checkbox"/> | <a href="#">82</a>  | 450.2715 | 898.5285  |
| <input checked="" type="checkbox"/> | <a href="#">83</a>  | 450.2724 | 898.5303  |
| <input checked="" type="checkbox"/> | <a href="#">84</a>  | 450.2747 | 898.5348  |
| <input checked="" type="checkbox"/> | <a href="#">85</a>  | 450.2750 | 898.5354  |
| <input checked="" type="checkbox"/> | <a href="#">86</a>  | 450.2752 | 898.5357  |
| <input checked="" type="checkbox"/> | <a href="#">87</a>  | 450.2752 | 898.5358  |
| <input checked="" type="checkbox"/> | <a href="#">88</a>  | 450.2984 | 898.5822  |
| <input checked="" type="checkbox"/> | <a href="#">90</a>  | 455.2437 | 908.4728  |
| <input checked="" type="checkbox"/> | <a href="#">91</a>  | 456.2783 | 910.5420  |
| <input checked="" type="checkbox"/> | <a href="#">92</a>  | 456.2793 | 910.5440  |
| <input checked="" type="checkbox"/> | <a href="#">93</a>  | 456.2797 | 910.5449  |
| <input checked="" type="checkbox"/> | <a href="#">94</a>  | 456.2798 | 910.5451  |
| <input checked="" type="checkbox"/> | <a href="#">95</a>  | 456.2807 | 910.5468  |
| <input checked="" type="checkbox"/> | <a href="#">96</a>  | 456.7796 | 911.5447  |
| <input checked="" type="checkbox"/> | <a href="#">97</a>  | 456.7800 | 911.5455  |
| <input checked="" type="checkbox"/> | <a href="#">98</a>  | 457.2073 | 912.4000  |
| <input checked="" type="checkbox"/> | <a href="#">99</a>  | 457.2741 | 912.5337  |
| <input checked="" type="checkbox"/> | <a href="#">100</a> | 457.2783 | 912.5420  |
| <input checked="" type="checkbox"/> | <a href="#">101</a> | 457.2784 | 912.5423  |
| <input checked="" type="checkbox"/> | <a href="#">102</a> | 457.2912 | 912.5677  |
| <input checked="" type="checkbox"/> | <a href="#">103</a> | 457.7781 | 913.5416  |
| <input checked="" type="checkbox"/> | <a href="#">104</a> | 462.7805 | 923.5464  |
| <input checked="" type="checkbox"/> | <a href="#">105</a> | 463.2797 | 924.5448  |
| <input checked="" type="checkbox"/> | <a href="#">106</a> | 464.2515 | 926.4885  |
| <input checked="" type="checkbox"/> | <a href="#">109</a> | 466.2636 | 930.5126  |
| <input checked="" type="checkbox"/> | <a href="#">110</a> | 466.7819 | 931.5493  |
| <input checked="" type="checkbox"/> | <a href="#">111</a> | 471.2605 | 940.5064  |
| <input checked="" type="checkbox"/> | <a href="#">112</a> | 472.2701 | 942.5255  |
| <input checked="" type="checkbox"/> | <a href="#">113</a> | 472.2858 | 942.5570  |
| <input checked="" type="checkbox"/> | <a href="#">114</a> | 472.2890 | 942.5635  |
| <input checked="" type="checkbox"/> | <a href="#">115</a> | 476.2616 | 950.5086  |
| <input checked="" type="checkbox"/> | <a href="#">116</a> | 476.7778 | 951.5410  |
| <input checked="" type="checkbox"/> | <a href="#">117</a> | 476.7784 | 951.5423  |
| <input checked="" type="checkbox"/> | <a href="#">118</a> | 486.2933 | 970.5721  |
| <input checked="" type="checkbox"/> | <a href="#">121</a> | 494.3024 | 986.5902  |
| <input checked="" type="checkbox"/> | <a href="#">122</a> | 501.2332 | 1000.4518 |
| <input checked="" type="checkbox"/> | <a href="#">123</a> | 501.2705 | 1000.5265 |
| <input checked="" type="checkbox"/> | <a href="#">124</a> | 501.3257 | 1000.6369 |
| <input checked="" type="checkbox"/> | <a href="#">125</a> | 501.7352 | 1001.4559 |
| <input checked="" type="checkbox"/> | <a href="#">126</a> | 503.2449 | 1004.4752 |
| <input checked="" type="checkbox"/> | <a href="#">127</a> | 503.2485 | 1004.4825 |
| <input checked="" type="checkbox"/> | <a href="#">128</a> | 503.7649 | 1005.5152 |
| <input checked="" type="checkbox"/> | <a href="#">129</a> | 507.2085 | 1012.4025 |
| <input checked="" type="checkbox"/> | <a href="#">130</a> | 508.2940 | 1014.5734 |
| <input checked="" type="checkbox"/> | <a href="#">131</a> | 510.7764 | 1019.5382 |
| <input checked="" type="checkbox"/> | <a href="#">132</a> | 513.2406 | 1024.4666 |
| <input checked="" type="checkbox"/> | <a href="#">133</a> | 513.2406 | 1024.4667 |
| <input checked="" type="checkbox"/> | <a href="#">134</a> | 513.3044 | 1024.5942 |
| <input checked="" type="checkbox"/> | <a href="#">135</a> | 514.2709 | 1026.5272 |
| <input checked="" type="checkbox"/> | <a href="#">136</a> | 516.3145 | 1030.6145 |
| <input checked="" type="checkbox"/> | <a href="#">137</a> | 516.3150 | 1030.6155 |
| <input checked="" type="checkbox"/> | <a href="#">138</a> | 516.8247 | 1031.6349 |
| <input checked="" type="checkbox"/> | <a href="#">139</a> | 518.3100 | 1034.6055 |
| <input checked="" type="checkbox"/> | <a href="#">140</a> | 518.7106 | 1035.4066 |
| <input checked="" type="checkbox"/> | <a href="#">142</a> | 521.2375 | 1040.4604 |
| <input checked="" type="checkbox"/> | <a href="#">143</a> | 523.2753 | 1044.5360 |
| <input checked="" type="checkbox"/> | <a href="#">144</a> | 523.2850 | 1044.5554 |
| <input checked="" type="checkbox"/> | <a href="#">146</a> | 526.2757 | 1050.5367 |
| <input checked="" type="checkbox"/> | <a href="#">147</a> | 529.2239 | 1056.4333 |
| <input checked="" type="checkbox"/> | <a href="#">148</a> | 529.2553 | 1056.4961 |
| <input checked="" type="checkbox"/> | <a href="#">149</a> | 530.2902 | 1058.5659 |
| <input checked="" type="checkbox"/> | <a href="#">150</a> | 530.7851 | 1059.5557 |
| <input checked="" type="checkbox"/> | <a href="#">151</a> | 530.7858 | 1059.5570 |

|                                     |                     |          |           |
|-------------------------------------|---------------------|----------|-----------|
| <input checked="" type="checkbox"/> | <a href="#">153</a> | 534.8206 | 1067.6266 |
| <input checked="" type="checkbox"/> | <a href="#">154</a> | 536.3266 | 1070.6387 |
| <input checked="" type="checkbox"/> | <a href="#">155</a> | 536.3270 | 1070.6394 |
| <input checked="" type="checkbox"/> | <a href="#">157</a> | 538.3274 | 1074.6403 |
| <input checked="" type="checkbox"/> | <a href="#">158</a> | 538.3283 | 1074.6420 |
| <input checked="" type="checkbox"/> | <a href="#">159</a> | 541.7518 | 1081.4891 |
| <input checked="" type="checkbox"/> | <a href="#">161</a> | 543.8202 | 1085.6259 |
| <input checked="" type="checkbox"/> | <a href="#">162</a> | 544.8021 | 1087.5897 |
| <input checked="" type="checkbox"/> | <a href="#">163</a> | 544.8271 | 1087.6397 |
| <input checked="" type="checkbox"/> | <a href="#">164</a> | 545.3020 | 1088.5895 |
| <input checked="" type="checkbox"/> | <a href="#">165</a> | 545.3526 | 1088.6907 |
| <input checked="" type="checkbox"/> | <a href="#">166</a> | 545.8223 | 1089.6300 |
| <input checked="" type="checkbox"/> | <a href="#">167</a> | 546.3338 | 1090.6531 |
| <input checked="" type="checkbox"/> | <a href="#">168</a> | 550.8213 | 1099.6281 |
| <input checked="" type="checkbox"/> | <a href="#">169</a> | 551.7969 | 1101.5793 |
| <input checked="" type="checkbox"/> | <a href="#">170</a> | 551.8197 | 1101.6249 |
| <input checked="" type="checkbox"/> | <a href="#">171</a> | 551.8226 | 1101.6307 |
| <input checked="" type="checkbox"/> | <a href="#">172</a> | 551.8237 | 1101.6329 |
| <input checked="" type="checkbox"/> | <a href="#">174</a> | 555.8231 | 1109.6317 |
| <input checked="" type="checkbox"/> | <a href="#">175</a> | 556.8319 | 1111.6492 |
| <input checked="" type="checkbox"/> | <a href="#">177</a> | 557.8220 | 1113.6295 |
| <input checked="" type="checkbox"/> | <a href="#">178</a> | 557.8234 | 1113.6322 |
| <input checked="" type="checkbox"/> | <a href="#">181</a> | 558.8303 | 1115.6461 |
| <input checked="" type="checkbox"/> | <a href="#">182</a> | 559.3280 | 1116.6415 |
| <input checked="" type="checkbox"/> | <a href="#">184</a> | 560.3304 | 1118.6462 |
| <input checked="" type="checkbox"/> | <a href="#">185</a> | 560.3390 | 1118.6634 |
| <input checked="" type="checkbox"/> | <a href="#">186</a> | 562.3300 | 1122.6454 |
| <input checked="" type="checkbox"/> | <a href="#">187</a> | 563.8380 | 1125.6615 |
| <input checked="" type="checkbox"/> | <a href="#">188</a> | 564.3282 | 1126.6418 |
| <input checked="" type="checkbox"/> | <a href="#">189</a> | 565.3071 | 1128.5996 |
| <input checked="" type="checkbox"/> | <a href="#">190</a> | 565.8318 | 1129.6490 |
| <input checked="" type="checkbox"/> | <a href="#">191</a> | 565.8348 | 1129.6550 |
| <input checked="" type="checkbox"/> | <a href="#">192</a> | 565.8352 | 1129.6558 |
| <input checked="" type="checkbox"/> | <a href="#">193</a> | 565.8354 | 1129.6562 |
| <input checked="" type="checkbox"/> | <a href="#">194</a> | 565.8355 | 1129.6564 |
| <input checked="" type="checkbox"/> | <a href="#">195</a> | 565.8419 | 1129.6692 |
| <input checked="" type="checkbox"/> | <a href="#">196</a> | 566.2613 | 1130.5080 |
| <input checked="" type="checkbox"/> | <a href="#">197</a> | 566.3394 | 1130.6642 |
| <input checked="" type="checkbox"/> | <a href="#">198</a> | 566.8438 | 1131.6730 |
| <input checked="" type="checkbox"/> | <a href="#">199</a> | 566.8438 | 1131.6730 |
| <input checked="" type="checkbox"/> | <a href="#">200</a> | 567.3142 | 1132.6138 |
| <input checked="" type="checkbox"/> | <a href="#">201</a> | 567.3161 | 1132.6176 |
| <input checked="" type="checkbox"/> | <a href="#">202</a> | 569.2810 | 1136.5475 |
| <input checked="" type="checkbox"/> | <a href="#">203</a> | 570.7925 | 1139.5705 |
| <input checked="" type="checkbox"/> | <a href="#">204</a> | 571.3544 | 1140.6942 |
| <input checked="" type="checkbox"/> | <a href="#">205</a> | 571.3549 | 1140.6952 |
| <input checked="" type="checkbox"/> | <a href="#">206</a> | 571.8342 | 1141.6538 |
| <input checked="" type="checkbox"/> | <a href="#">207</a> | 571.8423 | 1141.6701 |
| <input checked="" type="checkbox"/> | <a href="#">208</a> | 571.8455 | 1141.6763 |
| <input checked="" type="checkbox"/> | <a href="#">209</a> | 573.2936 | 1144.5727 |
| <input checked="" type="checkbox"/> | <a href="#">211</a> | 573.8368 | 1145.6591 |
| <input checked="" type="checkbox"/> | <a href="#">212</a> | 574.8440 | 1147.6735 |
| <input checked="" type="checkbox"/> | <a href="#">213</a> | 574.8442 | 1147.6738 |
| <input checked="" type="checkbox"/> | <a href="#">214</a> | 574.8442 | 1147.6739 |
| <input checked="" type="checkbox"/> | <a href="#">215</a> | 574.8443 | 1147.6741 |
| <input checked="" type="checkbox"/> | <a href="#">216</a> | 574.8443 | 1147.6741 |
| <input checked="" type="checkbox"/> | <a href="#">217</a> | 575.2963 | 1148.5781 |
| <input checked="" type="checkbox"/> | <a href="#">218</a> | 578.3378 | 1154.6610 |
| <input checked="" type="checkbox"/> | <a href="#">219</a> | 578.8311 | 1155.6475 |
| <input checked="" type="checkbox"/> | <a href="#">220</a> | 578.8356 | 1155.6565 |
| <input checked="" type="checkbox"/> | <a href="#">221</a> | 579.2709 | 1156.5271 |
| <input checked="" type="checkbox"/> | <a href="#">225</a> | 580.3302 | 1158.6459 |
| <input checked="" type="checkbox"/> | <a href="#">226</a> | 580.3413 | 1158.6680 |
| <input checked="" type="checkbox"/> | <a href="#">227</a> | 580.8417 | 1159.6688 |
| <input checked="" type="checkbox"/> | <a href="#">231</a> | 580.8454 | 1159.6762 |
| <input checked="" type="checkbox"/> | <a href="#">232</a> | 581.3444 | 1160.6743 |
| <input checked="" type="checkbox"/> | <a href="#">233</a> | 582.2831 | 1162.5516 |
| <input checked="" type="checkbox"/> | <a href="#">234</a> | 582.3402 | 1162.6658 |
| <input checked="" type="checkbox"/> | <a href="#">235</a> | 582.3495 | 1162.6845 |
| <input checked="" type="checkbox"/> | <a href="#">236</a> | 582.3518 | 1162.6890 |
| <input checked="" type="checkbox"/> | <a href="#">237</a> | 582.8458 | 1163.6770 |
| <input checked="" type="checkbox"/> | <a href="#">238</a> | 586.3163 | 1170.6180 |
| <input checked="" type="checkbox"/> | <a href="#">239</a> | 586.8434 | 1171.6723 |
| <input checked="" type="checkbox"/> | <a href="#">240</a> | 586.8439 | 1171.6733 |
| <input checked="" type="checkbox"/> | <a href="#">241</a> | 586.8458 | 1171.6770 |
| <input checked="" type="checkbox"/> | <a href="#">242</a> | 586.8462 | 1171.6778 |
| <input checked="" type="checkbox"/> | <a href="#">243</a> | 587.3436 | 1172.6725 |
| <input checked="" type="checkbox"/> | <a href="#">244</a> | 587.3436 | 1172.6725 |
| <input checked="" type="checkbox"/> | <a href="#">245</a> | 588.3511 | 1174.6877 |
| <input checked="" type="checkbox"/> | <a href="#">246</a> | 588.8406 | 1175.6666 |
| <input checked="" type="checkbox"/> | <a href="#">247</a> | 588.8409 | 1175.6672 |
| <input checked="" type="checkbox"/> | <a href="#">248</a> | 588.8432 | 1175.6718 |
| <input checked="" type="checkbox"/> | <a href="#">249</a> | 588.8543 | 1175.6940 |
| <input checked="" type="checkbox"/> | <a href="#">250</a> | 588.8570 | 1175.6995 |
| <input checked="" type="checkbox"/> | <a href="#">251</a> | 589.2392 | 1176.4638 |
| <input checked="" type="checkbox"/> | <a href="#">253</a> | 589.3140 | 1176.6134 |
| <input checked="" type="checkbox"/> | <a href="#">254</a> | 589.3310 | 1176.6475 |
| <input checked="" type="checkbox"/> | <a href="#">255</a> | 589.3418 | 1176.6691 |

|                                     |                     |          |           |
|-------------------------------------|---------------------|----------|-----------|
| <input checked="" type="checkbox"/> | <a href="#">256</a> | 589.3759 | 1176.7372 |
| <input checked="" type="checkbox"/> | <a href="#">257</a> | 589.8566 | 1177.6986 |
| <input checked="" type="checkbox"/> | <a href="#">258</a> | 590.3057 | 1178.5968 |
| <input checked="" type="checkbox"/> | <a href="#">259</a> | 590.3063 | 1178.5980 |
| <input checked="" type="checkbox"/> | <a href="#">260</a> | 590.3113 | 1178.6080 |
| <input checked="" type="checkbox"/> | <a href="#">261</a> | 590.8153 | 1179.6160 |
| <input checked="" type="checkbox"/> | <a href="#">262</a> | 591.3365 | 1180.6584 |
| <input checked="" type="checkbox"/> | <a href="#">263</a> | 592.3424 | 1182.6703 |
| <input checked="" type="checkbox"/> | <a href="#">264</a> | 592.8661 | 1183.7176 |
| <input checked="" type="checkbox"/> | <a href="#">265</a> | 593.3375 | 1184.6605 |
| <input checked="" type="checkbox"/> | <a href="#">266</a> | 593.8499 | 1185.6852 |
| <input checked="" type="checkbox"/> | <a href="#">267</a> | 594.3458 | 1186.6771 |
| <input checked="" type="checkbox"/> | <a href="#">268</a> | 594.3492 | 1186.6839 |
| <input checked="" type="checkbox"/> | <a href="#">269</a> | 594.3494 | 1186.6843 |
| <input checked="" type="checkbox"/> | <a href="#">270</a> | 594.8437 | 1187.6729 |
| <input checked="" type="checkbox"/> | <a href="#">271</a> | 594.8451 | 1187.6757 |
| <input checked="" type="checkbox"/> | <a href="#">272</a> | 594.8517 | 1187.6889 |
| <input checked="" type="checkbox"/> | <a href="#">273</a> | 594.8545 | 1187.6944 |
| <input checked="" type="checkbox"/> | <a href="#">274</a> | 595.2688 | 1188.5231 |
| <input checked="" type="checkbox"/> | <a href="#">275</a> | 595.8469 | 1189.6792 |
| <input checked="" type="checkbox"/> | <a href="#">277</a> | 595.8490 | 1189.6834 |
| <input checked="" type="checkbox"/> | <a href="#">278</a> | 596.8372 | 1191.6599 |
| <input checked="" type="checkbox"/> | <a href="#">279</a> | 597.2375 | 1192.4604 |
| <input checked="" type="checkbox"/> | <a href="#">280</a> | 597.2379 | 1192.4613 |
| <input checked="" type="checkbox"/> | <a href="#">281</a> | 597.3103 | 1192.6061 |
| <input checked="" type="checkbox"/> | <a href="#">282</a> | 597.8222 | 1193.6299 |
| <input checked="" type="checkbox"/> | <a href="#">283</a> | 597.8465 | 1193.6785 |
| <input checked="" type="checkbox"/> | <a href="#">285</a> | 600.8415 | 1199.6685 |
| <input checked="" type="checkbox"/> | <a href="#">286</a> | 600.8482 | 1199.6818 |
| <input checked="" type="checkbox"/> | <a href="#">287</a> | 600.8495 | 1199.6845 |
| <input checked="" type="checkbox"/> | <a href="#">288</a> | 600.8590 | 1199.7035 |
| <input checked="" type="checkbox"/> | <a href="#">290</a> | 601.3588 | 1200.7031 |
| <input checked="" type="checkbox"/> | <a href="#">292</a> | 601.8526 | 1201.6906 |
| <input checked="" type="checkbox"/> | <a href="#">293</a> | 602.3499 | 1202.6853 |
| <input checked="" type="checkbox"/> | <a href="#">294</a> | 602.8539 | 1203.6933 |
| <input checked="" type="checkbox"/> | <a href="#">295</a> | 602.8566 | 1203.6987 |
| <input checked="" type="checkbox"/> | <a href="#">296</a> | 602.8573 | 1203.7001 |
| <input checked="" type="checkbox"/> | <a href="#">297</a> | 603.2547 | 1204.4949 |
| <input checked="" type="checkbox"/> | <a href="#">298</a> | 603.2957 | 1204.5768 |
| <input checked="" type="checkbox"/> | <a href="#">299</a> | 603.3582 | 1204.7018 |
| <input checked="" type="checkbox"/> | <a href="#">300</a> | 603.3585 | 1204.7024 |
| <input checked="" type="checkbox"/> | <a href="#">301</a> | 603.3586 | 1204.7026 |
| <input checked="" type="checkbox"/> | <a href="#">302</a> | 603.8613 | 1205.7080 |
| <input checked="" type="checkbox"/> | <a href="#">303</a> | 604.3618 | 1206.7090 |
| <input checked="" type="checkbox"/> | <a href="#">304</a> | 604.3674 | 1206.7203 |
| <input checked="" type="checkbox"/> | <a href="#">305</a> | 604.3685 | 1206.7224 |
| <input checked="" type="checkbox"/> | <a href="#">306</a> | 605.2790 | 1208.5434 |
| <input checked="" type="checkbox"/> | <a href="#">307</a> | 607.3399 | 1212.6652 |
| <input checked="" type="checkbox"/> | <a href="#">308</a> | 607.8674 | 1213.7202 |
| <input checked="" type="checkbox"/> | <a href="#">309</a> | 608.1772 | 1214.3398 |
| <input checked="" type="checkbox"/> | <a href="#">310</a> | 608.3327 | 1214.6508 |
| <input checked="" type="checkbox"/> | <a href="#">311</a> | 608.3423 | 1214.6699 |
| <input checked="" type="checkbox"/> | <a href="#">312</a> | 608.8467 | 1215.6788 |
| <input checked="" type="checkbox"/> | <a href="#">313</a> | 609.3528 | 1216.6910 |
| <input checked="" type="checkbox"/> | <a href="#">314</a> | 609.3541 | 1216.6935 |
| <input checked="" type="checkbox"/> | <a href="#">315</a> | 609.8574 | 1217.7002 |
| <input checked="" type="checkbox"/> | <a href="#">316</a> | 609.8589 | 1217.7032 |
| <input checked="" type="checkbox"/> | <a href="#">317</a> | 609.8607 | 1217.7068 |
| <input checked="" type="checkbox"/> | <a href="#">318</a> | 609.8610 | 1217.7075 |
| <input checked="" type="checkbox"/> | <a href="#">319</a> | 609.8641 | 1217.7137 |
| <input checked="" type="checkbox"/> | <a href="#">320</a> | 610.8682 | 1219.7218 |
| <input checked="" type="checkbox"/> | <a href="#">321</a> | 611.3289 | 1220.6432 |
| <input checked="" type="checkbox"/> | <a href="#">322</a> | 611.3590 | 1220.7034 |
| <input checked="" type="checkbox"/> | <a href="#">323</a> | 611.3594 | 1220.7043 |
| <input checked="" type="checkbox"/> | <a href="#">324</a> | 611.3621 | 1220.7096 |
| <input checked="" type="checkbox"/> | <a href="#">325</a> | 611.8613 | 1221.7080 |
| <input checked="" type="checkbox"/> | <a href="#">326</a> | 611.8644 | 1221.7142 |
| <input checked="" type="checkbox"/> | <a href="#">327</a> | 612.8572 | 1223.6999 |
| <input checked="" type="checkbox"/> | <a href="#">328</a> | 614.3286 | 1226.6426 |
| <input checked="" type="checkbox"/> | <a href="#">329</a> | 615.3538 | 1228.6931 |
| <input checked="" type="checkbox"/> | <a href="#">330</a> | 615.3578 | 1228.7010 |
| <input checked="" type="checkbox"/> | <a href="#">331</a> | 616.3465 | 1230.6784 |
| <input checked="" type="checkbox"/> | <a href="#">332</a> | 616.3519 | 1230.6893 |
| <input checked="" type="checkbox"/> | <a href="#">333</a> | 616.3522 | 1230.6898 |
| <input checked="" type="checkbox"/> | <a href="#">334</a> | 616.8575 | 1231.7004 |
| <input checked="" type="checkbox"/> | <a href="#">335</a> | 617.3207 | 1232.6269 |
| <input checked="" type="checkbox"/> | <a href="#">336</a> | 617.3497 | 1232.6849 |
| <input checked="" type="checkbox"/> | <a href="#">337</a> | 617.2313 | 1233.6722 |
| <input checked="" type="checkbox"/> | <a href="#">338</a> | 617.8609 | 1233.7073 |
| <input checked="" type="checkbox"/> | <a href="#">339</a> | 617.8624 | 1233.7103 |
| <input checked="" type="checkbox"/> | <a href="#">340</a> | 617.8732 | 1233.7318 |
| <input checked="" type="checkbox"/> | <a href="#">341</a> | 618.2926 | 1234.5705 |
| <input checked="" type="checkbox"/> | <a href="#">342</a> | 618.2943 | 1234.5741 |
| <input checked="" type="checkbox"/> | <a href="#">343</a> | 618.3578 | 1234.7010 |
| <input checked="" type="checkbox"/> | <a href="#">344</a> | 618.3609 | 1234.7071 |
| <input checked="" type="checkbox"/> | <a href="#">345</a> | 618.3612 | 1234.7079 |
| <input checked="" type="checkbox"/> | <a href="#">346</a> | 618.8667 | 1235.7189 |
| <input checked="" type="checkbox"/> | <a href="#">347</a> | 619.3522 | 1236.6898 |

|                                     |                     |          |           |
|-------------------------------------|---------------------|----------|-----------|
| <input checked="" type="checkbox"/> | <a href="#">348</a> | 622.8579 | 1243.7013 |
| <input checked="" type="checkbox"/> | <a href="#">349</a> | 622.8615 | 1243.7084 |
| <input checked="" type="checkbox"/> | <a href="#">350</a> | 622.8674 | 1243.7203 |
| <input checked="" type="checkbox"/> | <a href="#">351</a> | 623.3575 | 1244.7004 |
| <input checked="" type="checkbox"/> | <a href="#">352</a> | 623.3608 | 1244.7070 |
| <input checked="" type="checkbox"/> | <a href="#">353</a> | 623.8531 | 1245.6916 |
| <input checked="" type="checkbox"/> | <a href="#">354</a> | 623.8627 | 1245.7109 |
| <input checked="" type="checkbox"/> | <a href="#">355</a> | 623.8634 | 1245.7123 |
| <input checked="" type="checkbox"/> | <a href="#">357</a> | 624.3581 | 1246.7016 |
| <input checked="" type="checkbox"/> | <a href="#">358</a> | 624.3605 | 1246.7064 |
| <input checked="" type="checkbox"/> | <a href="#">359</a> | 624.8600 | 1247.7055 |
| <input checked="" type="checkbox"/> | <a href="#">360</a> | 624.8686 | 1247.7227 |
| <input checked="" type="checkbox"/> | <a href="#">362</a> | 625.8637 | 1249.7128 |
| <input checked="" type="checkbox"/> | <a href="#">363</a> | 625.8764 | 1249.7383 |
| <input checked="" type="checkbox"/> | <a href="#">364</a> | 625.8845 | 1249.7544 |
| <input checked="" type="checkbox"/> | <a href="#">365</a> | 627.3682 | 1252.7218 |
| <input checked="" type="checkbox"/> | <a href="#">366</a> | 627.8108 | 1253.6070 |
| <input checked="" type="checkbox"/> | <a href="#">367</a> | 628.8849 | 1255.7553 |
| <input checked="" type="checkbox"/> | <a href="#">368</a> | 628.8858 | 1255.7570 |
| <input checked="" type="checkbox"/> | <a href="#">369</a> | 628.8872 | 1255.7599 |
| <input checked="" type="checkbox"/> | <a href="#">370</a> | 629.2723 | 1256.5300 |
| <input checked="" type="checkbox"/> | <a href="#">371</a> | 629.2821 | 1256.5497 |
| <input checked="" type="checkbox"/> | <a href="#">372</a> | 629.3208 | 1256.6271 |
| <input checked="" type="checkbox"/> | <a href="#">373</a> | 630.3598 | 1258.7050 |
| <input checked="" type="checkbox"/> | <a href="#">374</a> | 630.3636 | 1258.7127 |
| <input checked="" type="checkbox"/> | <a href="#">375</a> | 630.3640 | 1258.7134 |
| <input checked="" type="checkbox"/> | <a href="#">376</a> | 630.3655 | 1258.7165 |
| <input checked="" type="checkbox"/> | <a href="#">377</a> | 630.3675 | 1258.7205 |
| <input checked="" type="checkbox"/> | <a href="#">378</a> | 630.8429 | 1259.6712 |
| <input checked="" type="checkbox"/> | <a href="#">379</a> | 631.3365 | 1260.6585 |
| <input checked="" type="checkbox"/> | <a href="#">380</a> | 631.3565 | 1260.6985 |
| <input checked="" type="checkbox"/> | <a href="#">381</a> | 631.8629 | 1261.7113 |
| <input checked="" type="checkbox"/> | <a href="#">382</a> | 631.8779 | 1261.7412 |
| <input checked="" type="checkbox"/> | <a href="#">383</a> | 631.8782 | 1261.7417 |
| <input checked="" type="checkbox"/> | <a href="#">384</a> | 632.8619 | 1263.7093 |
| <input checked="" type="checkbox"/> | <a href="#">385</a> | 633.3193 | 1264.6241 |
| <input checked="" type="checkbox"/> | <a href="#">386</a> | 633.3563 | 1264.6981 |
| <input checked="" type="checkbox"/> | <a href="#">387</a> | 633.3691 | 1264.7236 |
| <input checked="" type="checkbox"/> | <a href="#">388</a> | 634.8679 | 1267.7212 |
| <input checked="" type="checkbox"/> | <a href="#">391</a> | 637.8777 | 1273.7407 |
| <input checked="" type="checkbox"/> | <a href="#">392</a> | 638.3339 | 1274.6533 |
| <input checked="" type="checkbox"/> | <a href="#">393</a> | 638.3648 | 1274.7150 |
| <input checked="" type="checkbox"/> | <a href="#">394</a> | 638.3698 | 1274.7251 |
| <input checked="" type="checkbox"/> | <a href="#">395</a> | 638.8735 | 1275.7325 |
| <input checked="" type="checkbox"/> | <a href="#">396</a> | 639.8773 | 1277.7400 |
| <input checked="" type="checkbox"/> | <a href="#">397</a> | 640.3749 | 1278.7353 |
| <input checked="" type="checkbox"/> | <a href="#">398</a> | 640.8720 | 1279.7295 |
| <input checked="" type="checkbox"/> | <a href="#">399</a> | 640.8763 | 1279.7381 |
| <input checked="" type="checkbox"/> | <a href="#">400</a> | 642.3653 | 1282.7160 |
| <input checked="" type="checkbox"/> | <a href="#">401</a> | 643.3347 | 1284.6547 |
| <input checked="" type="checkbox"/> | <a href="#">402</a> | 644.8806 | 1287.7466 |
| <input checked="" type="checkbox"/> | <a href="#">403</a> | 645.3456 | 1288.6767 |
| <input checked="" type="checkbox"/> | <a href="#">404</a> | 646.0210 | 1290.0275 |
| <input checked="" type="checkbox"/> | <a href="#">405</a> | 646.2262 | 1290.4378 |
| <input checked="" type="checkbox"/> | <a href="#">406</a> | 646.2848 | 1290.5551 |
| <input checked="" type="checkbox"/> | <a href="#">407</a> | 646.3751 | 1290.7356 |
| <input checked="" type="checkbox"/> | <a href="#">408</a> | 647.3667 | 1292.7189 |
| <input checked="" type="checkbox"/> | <a href="#">409</a> | 648.3965 | 1294.7784 |
| <input checked="" type="checkbox"/> | <a href="#">410</a> | 650.8646 | 1299.7146 |
| <input checked="" type="checkbox"/> | <a href="#">411</a> | 651.3259 | 1300.6373 |
| <input checked="" type="checkbox"/> | <a href="#">412</a> | 652.8804 | 1303.7462 |
| <input checked="" type="checkbox"/> | <a href="#">414</a> | 653.4738 | 1304.9330 |
| <input checked="" type="checkbox"/> | <a href="#">415</a> | 654.3556 | 1306.6967 |
| <input checked="" type="checkbox"/> | <a href="#">416</a> | 654.3682 | 1306.7218 |
| <input checked="" type="checkbox"/> | <a href="#">417</a> | 655.3330 | 1308.6515 |
| <input checked="" type="checkbox"/> | <a href="#">418</a> | 655.3404 | 1308.6663 |
| <input checked="" type="checkbox"/> | <a href="#">419</a> | 655.3421 | 1308.6696 |
| <input checked="" type="checkbox"/> | <a href="#">420</a> | 655.3501 | 1308.6857 |
| <input checked="" type="checkbox"/> | <a href="#">421</a> | 655.3851 | 1308.7557 |
| <input checked="" type="checkbox"/> | <a href="#">422</a> | 655.3890 | 1308.7634 |
| <input checked="" type="checkbox"/> | <a href="#">423</a> | 655.8863 | 1309.7581 |
| <input checked="" type="checkbox"/> | <a href="#">424</a> | 438.9302 | 1313.7688 |
| <input checked="" type="checkbox"/> | <a href="#">425</a> | 659.8504 | 1317.6862 |
| <input checked="" type="checkbox"/> | <a href="#">426</a> | 665.4228 | 1328.8310 |
| <input checked="" type="checkbox"/> | <a href="#">427</a> | 666.3697 | 1330.7249 |
| <input checked="" type="checkbox"/> | <a href="#">428</a> | 446.2424 | 1335.7054 |
| <input checked="" type="checkbox"/> | <a href="#">430</a> | 669.8388 | 1337.6630 |
| <input checked="" type="checkbox"/> | <a href="#">431</a> | 670.3713 | 1338.7279 |
| <input checked="" type="checkbox"/> | <a href="#">432</a> | 670.8533 | 1339.6920 |
| <input checked="" type="checkbox"/> | <a href="#">433</a> | 672.3747 | 1342.7348 |
| <input checked="" type="checkbox"/> | <a href="#">434</a> | 677.3805 | 1352.7464 |
| <input checked="" type="checkbox"/> | <a href="#">435</a> | 677.3823 | 1352.7499 |
| <input checked="" type="checkbox"/> | <a href="#">436</a> | 678.2536 | 1354.4927 |
| <input checked="" type="checkbox"/> | <a href="#">437</a> | 678.3721 | 1354.7297 |
| <input checked="" type="checkbox"/> | <a href="#">439</a> | 687.8404 | 1373.6663 |
| <input checked="" type="checkbox"/> | <a href="#">440</a> | 688.3683 | 1374.7220 |
| <input checked="" type="checkbox"/> | <a href="#">441</a> | 691.3329 | 1380.6513 |
| <input checked="" type="checkbox"/> | <a href="#">442</a> | 692.3652 | 1382.7158 |



|                                     |                     |          |           |
|-------------------------------------|---------------------|----------|-----------|
| <input checked="" type="checkbox"/> | <a href="#">443</a> | 465.2499 | 1392.7279 |
| <input checked="" type="checkbox"/> | <a href="#">444</a> | 465.2507 | 1392.7302 |
| <input checked="" type="checkbox"/> | <a href="#">445</a> | 698.3146 | 1394.6147 |
| <input checked="" type="checkbox"/> | <a href="#">446</a> | 699.3677 | 1396.7208 |
| <input checked="" type="checkbox"/> | <a href="#">447</a> | 699.4088 | 1396.8030 |
| <input checked="" type="checkbox"/> | <a href="#">448</a> | 705.3689 | 1408.7232 |
| <input checked="" type="checkbox"/> | <a href="#">449</a> | 705.8503 | 1409.6860 |
| <input checked="" type="checkbox"/> | <a href="#">450</a> | 706.3321 | 1410.6497 |
| <input checked="" type="checkbox"/> | <a href="#">452</a> | 708.3721 | 1414.7297 |
| <input checked="" type="checkbox"/> | <a href="#">453</a> | 472.5869 | 1414.7390 |
| <input checked="" type="checkbox"/> | <a href="#">454</a> | 710.3311 | 1418.6476 |
| <input checked="" type="checkbox"/> | <a href="#">455</a> | 710.4014 | 1418.7882 |
| <input checked="" type="checkbox"/> | <a href="#">456</a> | 713.3557 | 1424.6969 |
| <input checked="" type="checkbox"/> | <a href="#">457</a> | 714.4372 | 1426.8598 |
| <input checked="" type="checkbox"/> | <a href="#">458</a> | 716.3756 | 1430.7367 |
| <input checked="" type="checkbox"/> | <a href="#">459</a> | 721.3564 | 1440.6982 |
| <input checked="" type="checkbox"/> | <a href="#">460</a> | 721.3955 | 1440.7765 |
| <input checked="" type="checkbox"/> | <a href="#">461</a> | 723.3259 | 1444.6372 |
| <input checked="" type="checkbox"/> | <a href="#">462</a> | 723.8850 | 1445.7554 |
| <input checked="" type="checkbox"/> | <a href="#">463</a> | 725.8259 | 1449.6372 |
| <input checked="" type="checkbox"/> | <a href="#">464</a> | 728.3043 | 1454.5941 |
| <input checked="" type="checkbox"/> | <a href="#">465</a> | 730.3561 | 1458.6976 |
| <input checked="" type="checkbox"/> | <a href="#">466</a> | 732.4288 | 1462.8431 |
| <input checked="" type="checkbox"/> | <a href="#">467</a> | 733.3669 | 1464.7192 |
| <input checked="" type="checkbox"/> | <a href="#">468</a> | 733.8514 | 1465.6883 |
| <input checked="" type="checkbox"/> | <a href="#">469</a> | 734.3610 | 1466.7074 |
| <input checked="" type="checkbox"/> | <a href="#">470</a> | 736.3605 | 1470.7064 |
| <input checked="" type="checkbox"/> | <a href="#">471</a> | 738.4021 | 1474.7896 |
| <input checked="" type="checkbox"/> | <a href="#">472</a> | 738.4021 | 1474.7897 |
| <input checked="" type="checkbox"/> | <a href="#">473</a> | 740.4088 | 1478.8031 |
| <input checked="" type="checkbox"/> | <a href="#">474</a> | 743.3755 | 1484.7364 |
| <input checked="" type="checkbox"/> | <a href="#">475</a> | 743.9291 | 1485.8436 |
| <input checked="" type="checkbox"/> | <a href="#">476</a> | 744.3498 | 1486.6850 |
| <input checked="" type="checkbox"/> | <a href="#">477</a> | 748.3425 | 1494.6705 |
| <input checked="" type="checkbox"/> | <a href="#">478</a> | 749.3936 | 1496.7725 |
| <input checked="" type="checkbox"/> | <a href="#">479</a> | 749.8572 | 1497.6997 |
| <input checked="" type="checkbox"/> | <a href="#">480</a> | 751.3721 | 1500.7297 |
| <input checked="" type="checkbox"/> | <a href="#">481</a> | 751.3859 | 1500.7573 |
| <input checked="" type="checkbox"/> | <a href="#">482</a> | 753.8383 | 1505.6620 |
| <input checked="" type="checkbox"/> | <a href="#">483</a> | 756.3698 | 1510.7250 |
| <input checked="" type="checkbox"/> | <a href="#">484</a> | 756.3699 | 1510.7252 |
| <input checked="" type="checkbox"/> | <a href="#">485</a> | 756.3728 | 1510.7311 |
| <input checked="" type="checkbox"/> | <a href="#">486</a> | 757.3895 | 1512.7645 |
| <input checked="" type="checkbox"/> | <a href="#">487</a> | 769.3306 | 1536.6466 |
| <input checked="" type="checkbox"/> | <a href="#">488</a> | 514.6159 | 1540.8259 |
| <input checked="" type="checkbox"/> | <a href="#">489</a> | 779.3141 | 1556.6136 |
| <input checked="" type="checkbox"/> | <a href="#">490</a> | 780.4111 | 1558.8077 |
| <input checked="" type="checkbox"/> | <a href="#">491</a> | 781.4153 | 1560.8161 |
| <input checked="" type="checkbox"/> | <a href="#">492</a> | 781.9159 | 1561.8172 |
| <input checked="" type="checkbox"/> | <a href="#">493</a> | 783.3971 | 1564.7796 |
| <input checked="" type="checkbox"/> | <a href="#">494</a> | 786.4080 | 1570.8014 |
| <input checked="" type="checkbox"/> | <a href="#">495</a> | 797.3834 | 1592.7522 |
| <input checked="" type="checkbox"/> | <a href="#">496</a> | 820.3585 | 1638.7024 |
| <input checked="" type="checkbox"/> | <a href="#">497</a> | 825.4234 | 1648.8323 |
| <input checked="" type="checkbox"/> | <a href="#">498</a> | 829.9136 | 1657.8127 |
| <input checked="" type="checkbox"/> | <a href="#">499</a> | 834.3987 | 1666.7829 |
| <input checked="" type="checkbox"/> | <a href="#">500</a> | 836.0096 | 1670.0047 |
| <input checked="" type="checkbox"/> | <a href="#">501</a> | 847.3882 | 1692.7618 |
| <input checked="" type="checkbox"/> | <a href="#">502</a> | 854.3988 | 1706.7831 |
| <input checked="" type="checkbox"/> | <a href="#">503</a> | 854.8991 | 1707.7837 |
| <input checked="" type="checkbox"/> | <a href="#">504</a> | 882.4129 | 1762.8111 |
| <input checked="" type="checkbox"/> | <a href="#">505</a> | 883.3811 | 1764.7476 |
| <input checked="" type="checkbox"/> | <a href="#">506</a> | 891.3800 | 1780.7455 |
| <input checked="" type="checkbox"/> | <a href="#">507</a> | 897.9192 | 1793.8238 |
| <input checked="" type="checkbox"/> | <a href="#">508</a> | 897.9192 | 1793.8239 |
| <input checked="" type="checkbox"/> | <a href="#">509</a> | 898.4197 | 1794.8248 |
| <input checked="" type="checkbox"/> | <a href="#">510</a> | 905.4079 | 1808.8013 |
| <input checked="" type="checkbox"/> | <a href="#">511</a> | 905.4206 | 1808.8266 |
| <input checked="" type="checkbox"/> | <a href="#">512</a> | 604.2755 | 1809.8047 |
| <input checked="" type="checkbox"/> | <a href="#">513</a> | 905.9154 | 1809.8163 |
| <input checked="" type="checkbox"/> | <a href="#">514</a> | 905.9195 | 1809.8244 |
| <input checked="" type="checkbox"/> | <a href="#">515</a> | 906.4302 | 1810.8458 |
| <input checked="" type="checkbox"/> | <a href="#">516</a> | 906.4353 | 1810.8560 |
| <input checked="" type="checkbox"/> | <a href="#">517</a> | 604.9624 | 1811.8654 |
| <input checked="" type="checkbox"/> | <a href="#">518</a> | 913.4173 | 1824.8200 |
| <input checked="" type="checkbox"/> | <a href="#">519</a> | 913.4565 | 1824.8983 |
| <input checked="" type="checkbox"/> | <a href="#">520</a> | 617.2640 | 1848.7703 |
| <input checked="" type="checkbox"/> | <a href="#">521</a> | 926.4317 | 1850.8489 |
| <input checked="" type="checkbox"/> | <a href="#">522</a> | 926.4373 | 1850.8601 |
| <input checked="" type="checkbox"/> | <a href="#">523</a> | 623.3180 | 1866.9322 |
| <input checked="" type="checkbox"/> | <a href="#">524</a> | 946.9709 | 1891.9273 |
| <input checked="" type="checkbox"/> | <a href="#">525</a> | 952.4783 | 1902.9421 |
| <input checked="" type="checkbox"/> | <a href="#">526</a> | 954.9675 | 1907.9204 |
| <input checked="" type="checkbox"/> | <a href="#">527</a> | 637.2985 | 1908.8737 |
| <input checked="" type="checkbox"/> | <a href="#">528</a> | 637.6340 | 1909.8801 |
| <input checked="" type="checkbox"/> | <a href="#">529</a> | 955.9503 | 1909.8860 |
| <input checked="" type="checkbox"/> | <a href="#">530</a> | 960.4247 | 1918.8348 |
| <input checked="" type="checkbox"/> | <a href="#">531</a> | 963.4527 | 1924.8908 |

|                                     |                     |           |           |
|-------------------------------------|---------------------|-----------|-----------|
| <input checked="" type="checkbox"/> | <a href="#">532</a> | 642.9648  | 1925.8726 |
| <input checked="" type="checkbox"/> | <a href="#">533</a> | 642.9677  | 1925.8813 |
| <input checked="" type="checkbox"/> | <a href="#">534</a> | 963.9484  | 1925.8823 |
| <input checked="" type="checkbox"/> | <a href="#">535</a> | 963.9488  | 1925.8831 |
| <input checked="" type="checkbox"/> | <a href="#">536</a> | 963.9489  | 1925.8833 |
| <input checked="" type="checkbox"/> | <a href="#">537</a> | 963.9493  | 1925.8841 |
| <input checked="" type="checkbox"/> | <a href="#">539</a> | 964.4288  | 1926.8429 |
| <input checked="" type="checkbox"/> | <a href="#">540</a> | 964.4593  | 1926.9041 |
| <input checked="" type="checkbox"/> | <a href="#">541</a> | 967.4280  | 1932.8414 |
| <input checked="" type="checkbox"/> | <a href="#">542</a> | 970.5015  | 1938.9884 |
| <input checked="" type="checkbox"/> | <a href="#">543</a> | 970.5038  | 1938.9930 |
| <input checked="" type="checkbox"/> | <a href="#">544</a> | 647.6509  | 1939.9309 |
| <input checked="" type="checkbox"/> | <a href="#">545</a> | 971.3960  | 1940.7775 |
| <input checked="" type="checkbox"/> | <a href="#">546</a> | 971.4308  | 1940.8471 |
| <input checked="" type="checkbox"/> | <a href="#">547</a> | 971.4374  | 1940.8603 |
| <input checked="" type="checkbox"/> | <a href="#">548</a> | 971.4611  | 1940.9077 |
| <input checked="" type="checkbox"/> | <a href="#">549</a> | 971.4775  | 1940.9404 |
| <input checked="" type="checkbox"/> | <a href="#">550</a> | 648.2967  | 1941.8684 |
| <input checked="" type="checkbox"/> | <a href="#">551</a> | 648.2968  | 1941.8686 |
| <input checked="" type="checkbox"/> | <a href="#">552</a> | 648.2975  | 1941.8706 |
| <input checked="" type="checkbox"/> | <a href="#">553</a> | 971.9457  | 1941.8767 |
| <input checked="" type="checkbox"/> | <a href="#">554</a> | 971.9460  | 1941.8774 |
| <input checked="" type="checkbox"/> | <a href="#">555</a> | 971.9462  | 1941.8779 |
| <input checked="" type="checkbox"/> | <a href="#">556</a> | 971.9464  | 1941.8782 |
| <input checked="" type="checkbox"/> | <a href="#">557</a> | 971.9481  | 1941.8816 |
| <input checked="" type="checkbox"/> | <a href="#">558</a> | 972.4384  | 1942.8623 |
| <input checked="" type="checkbox"/> | <a href="#">559</a> | 648.6328  | 1942.8766 |
| <input checked="" type="checkbox"/> | <a href="#">560</a> | 653.0282  | 1956.0628 |
| <input checked="" type="checkbox"/> | <a href="#">561</a> | 653.2974  | 1956.8703 |
| <input checked="" type="checkbox"/> | <a href="#">562</a> | 979.4456  | 1956.8766 |
| <input checked="" type="checkbox"/> | <a href="#">563</a> | 979.4880  | 1956.9614 |
| <input checked="" type="checkbox"/> | <a href="#">564</a> | 653.6275  | 1957.8607 |
| <input checked="" type="checkbox"/> | <a href="#">565</a> | 979.9385  | 1957.8625 |
| <input checked="" type="checkbox"/> | <a href="#">566</a> | 979.9399  | 1957.8652 |
| <input checked="" type="checkbox"/> | <a href="#">567</a> | 980.4461  | 1958.8777 |
| <input checked="" type="checkbox"/> | <a href="#">568</a> | 980.4484  | 1958.8822 |
| <input checked="" type="checkbox"/> | <a href="#">569</a> | 984.4604  | 1966.9063 |
| <input checked="" type="checkbox"/> | <a href="#">570</a> | 987.4704  | 1972.9263 |
| <input checked="" type="checkbox"/> | <a href="#">571</a> | 987.9399  | 1973.8653 |
| <input checked="" type="checkbox"/> | <a href="#">572</a> | 992.4566  | 1982.8987 |
| <input checked="" type="checkbox"/> | <a href="#">573</a> | 992.9629  | 1983.9113 |
| <input checked="" type="checkbox"/> | <a href="#">574</a> | 1006.5259 | 2011.0372 |
| <input checked="" type="checkbox"/> | <a href="#">575</a> | 1014.0132 | 2026.0119 |
| <input checked="" type="checkbox"/> | <a href="#">576</a> | 1014.5153 | 2027.0161 |
| <input checked="" type="checkbox"/> | <a href="#">577</a> | 1014.5286 | 2027.0426 |
| <input checked="" type="checkbox"/> | <a href="#">578</a> | 1021.5074 | 2041.0003 |
| <input checked="" type="checkbox"/> | <a href="#">579</a> | 1021.5133 | 2041.0121 |
| <input checked="" type="checkbox"/> | <a href="#">580</a> | 1026.4195 | 2050.8244 |
| <input checked="" type="checkbox"/> | <a href="#">581</a> | 1027.4353 | 2052.8560 |
| <input checked="" type="checkbox"/> | <a href="#">582</a> | 1031.4758 | 2060.9371 |
| <input checked="" type="checkbox"/> | <a href="#">583</a> | 1031.4810 | 2060.9474 |
| <input checked="" type="checkbox"/> | <a href="#">584</a> | 1031.4815 | 2060.9484 |
| <input checked="" type="checkbox"/> | <a href="#">585</a> | 688.3205  | 2061.9397 |
| <input checked="" type="checkbox"/> | <a href="#">586</a> | 1032.4756 | 2062.9367 |
| <input checked="" type="checkbox"/> | <a href="#">587</a> | 1032.4762 | 2062.9378 |
| <input checked="" type="checkbox"/> | <a href="#">588</a> | 1032.4821 | 2062.9497 |
| <input checked="" type="checkbox"/> | <a href="#">589</a> | 1039.4589 | 2076.9033 |
| <input checked="" type="checkbox"/> | <a href="#">590</a> | 1039.5100 | 2077.0055 |
| <input checked="" type="checkbox"/> | <a href="#">591</a> | 693.6316  | 2077.8730 |
| <input checked="" type="checkbox"/> | <a href="#">592</a> | 1039.9492 | 2077.8838 |
| <input checked="" type="checkbox"/> | <a href="#">593</a> | 1040.4568 | 2078.8989 |
| <input checked="" type="checkbox"/> | <a href="#">594</a> | 1040.4611 | 2078.9077 |
| <input checked="" type="checkbox"/> | <a href="#">595</a> | 1044.0275 | 2086.0404 |
| <input checked="" type="checkbox"/> | <a href="#">596</a> | 1047.4680 | 2092.9215 |
| <input checked="" type="checkbox"/> | <a href="#">597</a> | 1047.5042 | 2092.9939 |
| <input checked="" type="checkbox"/> | <a href="#">598</a> | 698.9626  | 2093.8659 |
| <input checked="" type="checkbox"/> | <a href="#">599</a> | 1047.9443 | 2093.8740 |
| <input checked="" type="checkbox"/> | <a href="#">600</a> | 1047.9459 | 2093.8773 |
| <input checked="" type="checkbox"/> | <a href="#">601</a> | 699.2924  | 2094.8553 |
| <input checked="" type="checkbox"/> | <a href="#">602</a> | 699.2971  | 2094.8693 |
| <input checked="" type="checkbox"/> | <a href="#">603</a> | 1048.4425 | 2094.8705 |
| <input checked="" type="checkbox"/> | <a href="#">604</a> | 1048.4509 | 2094.8872 |
| <input checked="" type="checkbox"/> | <a href="#">605</a> | 1050.5253 | 2099.0360 |
| <input checked="" type="checkbox"/> | <a href="#">606</a> | 1050.5402 | 2099.0658 |
| <input checked="" type="checkbox"/> | <a href="#">607</a> | 1051.5284 | 2101.0423 |
| <input checked="" type="checkbox"/> | <a href="#">608</a> | 1057.5249 | 2113.0352 |
| <input checked="" type="checkbox"/> | <a href="#">609</a> | 1057.5462 | 2113.0779 |
| <input checked="" type="checkbox"/> | <a href="#">610</a> | 1058.5169 | 2115.0193 |
| <input checked="" type="checkbox"/> | <a href="#">611</a> | 1058.5262 | 2115.0379 |
| <input checked="" type="checkbox"/> | <a href="#">612</a> | 1058.5443 | 2115.0740 |
| <input checked="" type="checkbox"/> | <a href="#">613</a> | 1065.5269 | 2129.0393 |
| <input checked="" type="checkbox"/> | <a href="#">614</a> | 1073.5369 | 2145.0593 |
| <input checked="" type="checkbox"/> | <a href="#">615</a> | 1078.5158 | 2155.0171 |
| <input checked="" type="checkbox"/> | <a href="#">616</a> | 1079.0313 | 2156.0480 |
| <input checked="" type="checkbox"/> | <a href="#">617</a> | 1079.0322 | 2156.0498 |
| <input checked="" type="checkbox"/> | <a href="#">618</a> | 1084.4427 | 2166.8709 |
| <input checked="" type="checkbox"/> | <a href="#">619</a> | 724.3592  | 2170.0558 |
| <input checked="" type="checkbox"/> | <a href="#">620</a> | 1086.0369 | 2170.0592 |

|                                     |                     |           |           |
|-------------------------------------|---------------------|-----------|-----------|
| <input checked="" type="checkbox"/> | <a href="#">621</a> | 1086.0402 | 2170.0659 |
| <input checked="" type="checkbox"/> | <a href="#">622</a> | 1087.0287 | 2172.0428 |
| <input checked="" type="checkbox"/> | <a href="#">623</a> | 1087.0296 | 2172.0447 |
| <input checked="" type="checkbox"/> | <a href="#">624</a> | 1087.5284 | 2173.0423 |
| <input checked="" type="checkbox"/> | <a href="#">625</a> | 1087.5320 | 2173.0495 |
| <input checked="" type="checkbox"/> | <a href="#">626</a> | 1092.4431 | 2182.8716 |
| <input checked="" type="checkbox"/> | <a href="#">627</a> | 728.6321  | 2182.8746 |
| <input checked="" type="checkbox"/> | <a href="#">628</a> | 1092.4456 | 2182.8767 |
| <input checked="" type="checkbox"/> | <a href="#">629</a> | 1093.4675 | 2184.9204 |
| <input checked="" type="checkbox"/> | <a href="#">630</a> | 729.3576  | 2185.0509 |
| <input checked="" type="checkbox"/> | <a href="#">631</a> | 1094.0340 | 2186.0535 |
| <input checked="" type="checkbox"/> | <a href="#">632</a> | 1094.0369 | 2186.0593 |
| <input checked="" type="checkbox"/> | <a href="#">633</a> | 1094.5319 | 2187.0493 |
| <input checked="" type="checkbox"/> | <a href="#">634</a> | 1100.4554 | 2198.8963 |
| <input checked="" type="checkbox"/> | <a href="#">635</a> | 738.0097  | 2211.0073 |
| <input checked="" type="checkbox"/> | <a href="#">636</a> | 1116.5587 | 2231.1029 |
| <input checked="" type="checkbox"/> | <a href="#">637</a> | 1130.5518 | 2259.0890 |
| <input checked="" type="checkbox"/> | <a href="#">638</a> | 1136.5444 | 2271.0743 |
| <input checked="" type="checkbox"/> | <a href="#">639</a> | 1139.0406 | 2276.0667 |
| <input checked="" type="checkbox"/> | <a href="#">640</a> | 572.8142  | 2287.2275 |
| <input checked="" type="checkbox"/> | <a href="#">641</a> | 1145.5658 | 2289.1170 |
| <input checked="" type="checkbox"/> | <a href="#">642</a> | 573.8316  | 2291.2972 |
| <input checked="" type="checkbox"/> | <a href="#">643</a> | 1159.5814 | 2317.1482 |
| <input checked="" type="checkbox"/> | <a href="#">644</a> | 1160.0566 | 2318.0986 |
| <input checked="" type="checkbox"/> | <a href="#">645</a> | 1166.5581 | 2331.1016 |
| <input checked="" type="checkbox"/> | <a href="#">646</a> | 1167.5589 | 2333.1032 |
| <input checked="" type="checkbox"/> | <a href="#">647</a> | 1167.5630 | 2333.1114 |
| <input checked="" type="checkbox"/> | <a href="#">648</a> | 1168.0532 | 2334.0917 |
| <input checked="" type="checkbox"/> | <a href="#">649</a> | 1168.0668 | 2334.1190 |
| <input checked="" type="checkbox"/> | <a href="#">650</a> | 1169.5923 | 2337.1700 |
| <input checked="" type="checkbox"/> | <a href="#">651</a> | 1174.5645 | 2347.1144 |
| <input checked="" type="checkbox"/> | <a href="#">652</a> | 1174.5645 | 2347.1145 |
| <input checked="" type="checkbox"/> | <a href="#">653</a> | 1182.5914 | 2363.1682 |
| <input checked="" type="checkbox"/> | <a href="#">654</a> | 1183.8068 | 2365.5989 |
| <input checked="" type="checkbox"/> | <a href="#">655</a> | 593.8602  | 2371.4117 |
| <input checked="" type="checkbox"/> | <a href="#">656</a> | 1189.5874 | 2377.1602 |
| <input checked="" type="checkbox"/> | <a href="#">657</a> | 795.3300  | 2382.9680 |
| <input checked="" type="checkbox"/> | <a href="#">658</a> | 600.7595  | 2399.0087 |
| <input checked="" type="checkbox"/> | <a href="#">659</a> | 619.1008  | 2472.3741 |
| <input checked="" type="checkbox"/> | <a href="#">660</a> | 1237.6252 | 2473.2359 |
| <input checked="" type="checkbox"/> | <a href="#">661</a> | 866.4009  | 2596.1810 |
| <input checked="" type="checkbox"/> | <a href="#">662</a> | 653.3783  | 2609.4841 |
| <input checked="" type="checkbox"/> | <a href="#">663</a> | 989.1428  | 2964.4067 |
| <input checked="" type="checkbox"/> | <a href="#">664</a> | 911.6811  | 3642.6951 |
| <input checked="" type="checkbox"/> | <a href="#">665</a> | 645.8871  | 3869.2790 |

## Search Parameters

Type of search : MS/MS Ion Search  
Enzyme : Trypsin  
Variable modifications : [Carbamidomethyl \(C\)](#), [Oxidation \(M\)](#)  
Mass values : Monoisotopic  
Protein Mass : Unrestricted  
Peptide Mass Tolerance :  $\pm 50$  ppm  
Fragment Mass Tolerance :  $\pm 0.1$  Da  
Max Missed Cleavages : 1  
Instrument type : ESI-QUAD-TOF  
Number of queries : 665

Mascot: <http://www.matrixscience.com/>

## **S4 Fig MASCOT Search Results – Tris-Tricine Sample**

**MASCOT SCIENCE** Mascot Search Results

User :  
 Email :  
 Search title : Submitted from 14732 by Mascot Daemon on APAF-WS-08  
 MS data file : \\apaf-hpv-file\projects\External\17432\_VicUniWell\_SandiDempsey\_20150209\1\_MassSpec\5600\Run1\Results\150213\_P17432\_SD1096-2\_1.MGF  
 Database : sp\_sheep\_140625 sheep\_140625\_ (647 sequences; 258179 residues)  
 Timestamp : 13 Feb 2015 at 04:39:38 GMT  
 Protein hits : **P60713** sp|P60713|ACTB\_SHEEP Actin, cytoplasmic 1 OS=Ovis aries GN=ACTB PE=2 SV=1  
                   **077727** sp|077727|K1C15\_SHEEP Keratin, type I cytoskeletal 15 OS=Ovis aries GN=KRT15 PE=2 SV=1  
                   **Q9TTE2** sp|Q9TTE2|PGS2\_SHEEP Decorin OS=Ovis aries GN=DCN PE=2 SV=1  
                   **Q9BGM5** sp|Q9BGM5|K1C25\_SHEEP Keratin, type I cytoskeletal 25 OS=Ovis aries GN=KRT25 PE=2 SV=1  
                   **P14639** sp|P14639|ALBU\_SHEEP Serum albumin OS=Ovis aries GN=ALB PE=2 SV=1  
                   **P15241** sp|P15241|K2M2\_SHEEP Keratin, type II microfibrillar, component 7C OS=Ovis aries PE=1 SV=1  
                   **P12436** sp|P12436|VP5\_BTIVIA Outer capsid protein VP5 OS=Bluetongue virus 1 (isolate Australia) GN=S6 PE=3 SV=1

sp\_sheep\_140625 **Decoy** False discovery rate

Peptide matches above identity threshold                    22            4            18.18 %  
 Peptide matches above homology or identity threshold       22            4            18.18 %

**Mascot Score Histogram**

Ions score is  $-10 * \text{Log}(P)$ , where P is the probability that the observed match is a random event.  
 Individual ions scores > 11 indicate identity or extensive homology (p<0.05).  
 Protein scores are derived from ions scores as a non-probabilistic basis for ranking protein hits.

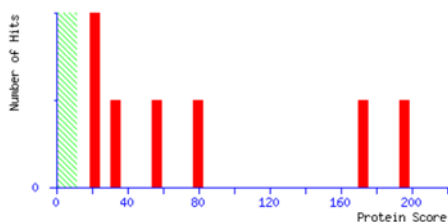

**Peptide Summary Report**

Format As Peptide Summary [Help](#)  
 Significance threshold p< 0.05            Max. number of hits AUTO            Show Percolator scores   
 Standard scoring  MudPIT scoring  Ions score or expect cut-off 11            Show sub-sets 0  
 Show pop-ups  Suppress pop-ups  Sort unassigned Decreasing Score            Require bold red

Select All    Select None    Search Selected     Error tolerant    Archive Report

1. [P60713](#)    Mass: 41710    Score: 196    Matches: 6(6)    Sequences: 3(3)    emPAI: 0.36

sp|P60713|ACTB\_SHEEP Actin, cytoplasmic 1 OS=Ovis aries GN=ACTB PE=2 SV=1

Check to include this hit in error tolerant search or archive report

| Query                                                   | Observed | Mr(expt)  | Mr(calc)  | ppm   | Miss Score | Expect | Rank     | Unique | Peptide                           |
|---------------------------------------------------------|----------|-----------|-----------|-------|------------|--------|----------|--------|-----------------------------------|
| <input checked="" type="checkbox"/> <a href="#">51</a>  | 398.2400 | 794.4655  | 794.4650  | 0.65  | 0          | 34     | 0.00041  | 1      | U K.IIAPPER.K                     |
| <input checked="" type="checkbox"/> <a href="#">270</a> | 566.7674 | 1131.5203 | 1131.5197 | 0.60  | 0          | (42)   | 6.9e-005 | 1      | U R.GYSFTTTAER.E                  |
| <input checked="" type="checkbox"/> <a href="#">271</a> | 566.7677 | 1131.5208 | 1131.5197 | 1.06  | 0          | 43     | 4.7e-005 | 1      | U R.GYSFTTTAER.E                  |
| <input checked="" type="checkbox"/> <a href="#">277</a> | 581.3128 | 1160.6109 | 1160.6111 | -0.12 | 0          | (40)   | 0.00022  | 1      | U K.EITALAPSTMK.I                 |
| <input checked="" type="checkbox"/> <a href="#">278</a> | 581.3129 | 1160.6113 | 1160.6111 | 0.18  | 0          | (44)   | 0.00011  | 1      | U K.EITALAPSTMK.I                 |
| <input checked="" type="checkbox"/> <a href="#">284</a> | 589.3095 | 1176.6045 | 1176.6060 | -1.30 | 0          | 68     | 5.4e-007 | 1      | U K.EITALAPSTMK.I + Oxidation (M) |

2. [077727](#)    Mass: 48740    Score: 174    Matches: 6(6)    Sequences: 2(2)    emPAI: 0.14

sp|077727|K1C15\_SHEEP Keratin, type I cytoskeletal 15 OS=Ovis aries GN=KRT15 PE=2 SV=1

Check to include this hit in error tolerant search or archive report

| Query                                                   | Observed | Mr(expt)  | Mr(calc)  | ppm   | Miss Score | Expect | Rank     | Unique | Peptide         |
|---------------------------------------------------------|----------|-----------|-----------|-------|------------|--------|----------|--------|-----------------|
| <input checked="" type="checkbox"/> <a href="#">56</a>  | 404.2031 | 806.3916  | 806.3923  | -0.86 | 0          | (38)   | 0.00015  | 1      | U R.LAADDR.L    |
| <input checked="" type="checkbox"/> <a href="#">57</a>  | 404.2036 | 806.3926  | 806.3923  | 0.43  | 0          | 48     | 1.9e-005 | 1      | U R.LAADDR.L    |
| <input checked="" type="checkbox"/> <a href="#">58</a>  | 404.2073 | 806.4000  | 806.3923  | 9.66  | 0          | (27)   | 0.0081   | 1      | U R.LAADDR.L    |
| <input checked="" type="checkbox"/> <a href="#">241</a> | 516.2998 | 1030.5851 | 1030.5910 | -5.70 | 0          | (27)   | 0.0034   | 1      | U R.VLDELTLTK.T |
| <input checked="" type="checkbox"/> <a href="#">242</a> | 516.3029 | 1030.5913 | 1030.5910 | 0.26  | 0          | 71     | 7.3e-008 | 1      | U R.VLDELTLTK.T |
| <input checked="" type="checkbox"/> <a href="#">243</a> | 516.3036 | 1030.5926 | 1030.5910 | 1.52  | 0          | (34)   | 0.00043  | 1      | U R.VLDELTLTK.T |

3. [Q9TTE2](#)    Mass: 39947    Score: 84    Matches: 2(2)    Sequences: 1(1)    emPAI: 0.08

sp|Q9TTE2|PGS2\_SHEEP Decorin OS=Ovis aries GN=DCN PE=2 SV=1

Check to include this hit in error tolerant search or archive report

| Query                                                   | Observed | Mr(expt)  | Mr(calc)  | ppm  | Miss Score | Expect | Rank     | Unique | Peptide           |
|---------------------------------------------------------|----------|-----------|-----------|------|------------|--------|----------|--------|-------------------|
| <input checked="" type="checkbox"/> <a href="#">264</a> | 550.3297 | 1098.6448 | 1098.6437 | 1.02 | 0          | (42)   | 6.3e-005 | 1      | U K.ISPGAFAPLVK.L |
| <input checked="" type="checkbox"/> <a href="#">265</a> | 550.3300 | 1098.6454 | 1098.6437 | 1.53 | 0          | 55     | 3.2e-006 | 1      | U K.ISPGAFAPLVK.L |

4. [Q9BGM5](#)    Mass: 49282    Score: 54    Matches: 4(3)    Sequences: 2(2)    emPAI: 0.14

sp|Q9BGM5|K1C25\_SHEEP Keratin, type I cytoskeletal 25 OS=Ovis aries GN=KRT25 PE=2 SV=1

Check to include this hit in error tolerant search or archive report

| Query                                                   | Observed | Mr(expt)  | Mr(calc)  | ppm   | Miss Score | Expect | Rank     | Unique | Peptide         |
|---------------------------------------------------------|----------|-----------|-----------|-------|------------|--------|----------|--------|-----------------|
| <a href="#">241</a>                                     | 516.2998 | 1030.5851 | 1030.5845 | 0.63  | 0          | (11)   | 0.12     | 2      | U R.VLDVITLCR.T |
| <a href="#">242</a>                                     | 516.3029 | 1030.5913 | 1030.5845 | 6.58  | 0          | (13)   | 0.047    | 2      | U R.VLDVITLCR.T |
| <a href="#">243</a>                                     | 516.3036 | 1030.5926 | 1030.5845 | 7.85  | 0          | 14     | 0.041    | 2      | U R.VLDVITLCR.T |
| <input checked="" type="checkbox"/> <a href="#">263</a> | 545.7676 | 1089.5207 | 1089.5237 | -2.71 | 0          | 53     | 4.8e-006 | 1      | U K.VTMQNLNDR.L |

5. [P14639](#) Score: 28 Matches: 1(1) Sequences: 1(1) emPAI: 0.05  
 sp|P14639|ALBU\_SHEEP Serum albumin OS=Ovis aries GN=ALB PE=2 SV=1  
 Check to include this hit in error tolerant search or archive report
- | Query                                                  | Observed | Mr(expt) | Mr(calc) | ppm  | Miss | Score | Expect | Rank | Unique | Peptide     |
|--------------------------------------------------------|----------|----------|----------|------|------|-------|--------|------|--------|-------------|
| <input checked="" type="checkbox"/> <a href="#">50</a> | 395.2396 | 788.4647 | 788.4644 | 0.48 | 0    | 28    | 0.0015 | 1    | U      | K.IVTDLTK.V |
- 
6. [P15241](#) Mass: 53647 Score: 22 Matches: 1(1) Sequences: 1(1) emPAI: 0.06  
 sp|P15241|K2M2\_SHEEP Keratin, type II microfibrillar, component 7C OS=Ovis aries PE=1 SV=1  
 Check to include this hit in error tolerant search or archive report
- | Query                                                   | Observed | Mr(expt)  | Mr(calc)  | ppm  | Miss | Score | Expect | Rank | Unique | Peptide         |
|---------------------------------------------------------|----------|-----------|-----------|------|------|-------|--------|------|--------|-----------------|
| <input checked="" type="checkbox"/> <a href="#">303</a> | 632.3513 | 1262.6880 | 1262.6870 | 0.81 | 0    | 22    | 0.0069 | 1    | U      | K.LGLDIEIATYR.R |
- Proteins matching the same set of peptides:  
[P25691](#) Mass: 55220 Score: 22 Matches: 1(1) Sequences: 1(1)  
 sp|P25691|K2M3\_SHEEP Keratin, type II microfibrillar, component 5 OS=Ovis aries PE=1 SV=1
- 
7. [P12436](#) Mass: 59207 Score: 22 Matches: 6(5) Sequences: 1(1) emPAI: 0.06  
 sp|P12436|VP5\_BTVA Outer capsid protein VP5 OS=Bluetongue virus 1 (isolate Australia) GN=S6 PE=3 SV=1  
 Check to include this hit in error tolerant search or archive report

| Query                                                   | Observed | Mr(expt)  | Mr(calc)  | ppm  | Miss | Score | Expect | Rank | Unique | Peptide                              |
|---------------------------------------------------------|----------|-----------|-----------|------|------|-------|--------|------|--------|--------------------------------------|
| <input checked="" type="checkbox"/> <a href="#">329</a> | 598.9439 | 1793.8098 | 1793.7924 | 9.72 | 0    | (15)  | 0.033  | 1    | U      | R.DGMQEAAIQEIAGMTR.G + Oxidation (M) |
| <input checked="" type="checkbox"/> <a href="#">330</a> | 598.9439 | 1793.8098 | 1793.7924 | 9.72 | 0    | (15)  | 0.03   | 1    | U      | R.DGMQEAAIQEIAGMTR.G + Oxidation (M) |
| <input checked="" type="checkbox"/> <a href="#">332</a> | 598.9442 | 1793.8107 | 1793.7924 | 10.2 | 0    | (11)  | 0.076  | 1    | U      | R.DGMQEAAIQEIAGMTR.G + Oxidation (M) |
| <input checked="" type="checkbox"/> <a href="#">333</a> | 598.9444 | 1793.8113 | 1793.7924 | 10.5 | 0    | 15    | 0.029  | 1    | U      | R.DGMQEAAIQEIAGMTR.G + Oxidation (M) |
| <input checked="" type="checkbox"/> <a href="#">334</a> | 598.9444 | 1793.8113 | 1793.7924 | 10.5 | 0    | (14)  | 0.038  | 1    | U      | R.DGMQEAAIQEIAGMTR.G + Oxidation (M) |
| <input checked="" type="checkbox"/> <a href="#">335</a> | 598.9444 | 1793.8113 | 1793.7924 | 10.5 | 0    | (14)  | 0.039  | 1    | U      | R.DGMQEAAIQEIAGMTR.G + Oxidation (M) |

Peptide matches not assigned to protein hits: (no details means no match)

| Query                                                   | Observed | Mr(expt)  | Mr(calc)  | ppm    | Miss | Score | Expect | Rank | Unique | Peptide                                        |
|---------------------------------------------------------|----------|-----------|-----------|--------|------|-------|--------|------|--------|------------------------------------------------|
| <input checked="" type="checkbox"/> <a href="#">131</a> | 442.7633 | 883.5121  | 883.5491  | -41.85 | 0    | 9     | 0.13   | 1    |        | IITPAITR                                       |
| <input checked="" type="checkbox"/> <a href="#">328</a> | 897.9110 | 1793.8075 | 1793.7924 | 8.43   | 0    | 8     | 0.16   | 1    |        | DGMQEAAIQEIAGMTR + Oxidation (M)               |
| <input checked="" type="checkbox"/> <a href="#">331</a> | 598.9439 | 1793.8098 | 1793.7924 | 9.72   | 0    | 8     | 0.17   | 1    |        | DGMQEAAIQEIAGMTR + Oxidation (M)               |
| <input checked="" type="checkbox"/> <a href="#">222</a> | 487.2698 | 972.5250  | 972.5175  | 7.75   | 1    | 7     | 0.18   | 1    |        | NGAPMTRVK                                      |
| <input checked="" type="checkbox"/> <a href="#">217</a> | 481.2473 | 960.4801  | 960.4487  | 32.6   | 0    | 7     | 0.58   | 1    |        | DLPQMWR + Oxidation (M)                        |
| <input checked="" type="checkbox"/> <a href="#">181</a> | 457.2951 | 912.5756  | 912.5644  | 12.3   | 0    | 7     | 0.19   | 1    |        | VLLSSPAVK                                      |
| <input checked="" type="checkbox"/> <a href="#">250</a> | 523.2846 | 1044.5546 | 1044.5862 | -30.29 | 1    | 7     | 0.19   | 1    |        | LSRLQCLR + Carbamidomethyl (C)                 |
| <input checked="" type="checkbox"/> <a href="#">312</a> | 681.8625 | 1361.7104 | 1361.7554 | -33.06 | 1    | 7     | 0.23   | 1    |        | QKSQLILEEFK                                    |
| <input checked="" type="checkbox"/> <a href="#">327</a> | 897.9110 | 1793.8074 | 1793.7924 | 8.38   | 0    | 7     | 0.2    | 1    |        | DGMQEAAIQEIAGMTR + Oxidation (M)               |
| <input checked="" type="checkbox"/> <a href="#">30</a>  | 379.2113 | 756.4080  | 756.3952  | 16.9   | 0    | 6     | 0.53   | 1    |        | MPPSGLR                                        |
| <input checked="" type="checkbox"/> <a href="#">276</a> | 576.2876 | 1150.5606 | 1150.5506 | 8.72   | 0    | 6     | 0.32   | 1    |        | YLAEVAAGDDK                                    |
| <input checked="" type="checkbox"/> <a href="#">31</a>  | 379.2168 | 756.4191  | 756.3952  | 31.6   | 0    | 6     | 0.57   | 1    |        | MPPSGLR                                        |
| <input checked="" type="checkbox"/> <a href="#">115</a> | 435.7553 | 1738.9921 | 1738.9267 | 37.6   | 1    | 5     | 0.46   | 1    |        | VVSDPQGIRAWAVR                                 |
| <input checked="" type="checkbox"/> <a href="#">223</a> | 487.2707 | 972.5268  | 972.5175  | 9.60   | 1    | 5     | 0.57   | 1    |        | NGAPMTRVK                                      |
| <input checked="" type="checkbox"/> <a href="#">53</a>  | 400.7326 | 799.4507  | 799.4341  | 20.9   | 0    | 4     | 0.35   | 1    |        | DLIHR                                          |
| <input checked="" type="checkbox"/> <a href="#">306</a> | 643.8787 | 1285.7428 | 1285.7241 | 14.5   | 1    | 4     | 0.44   | 1    |        | SKLAGLEEALQK                                   |
| <input checked="" type="checkbox"/> <a href="#">209</a> | 477.3051 | 952.5956  | 952.5705  | 26.4   | 0    | 3     | 0.49   | 1    |        | LLEVLNPR                                       |
| <input checked="" type="checkbox"/> <a href="#">227</a> | 494.3017 | 986.5889  | 986.5509  | 38.5   | 1    | 3     | 0.53   | 1    |        | TSLKTPGGAR                                     |
| <input checked="" type="checkbox"/> <a href="#">189</a> | 464.2524 | 926.4902  | 926.4722  | 19.4   | 1    | 3     | 1.1    | 1    |        | YRAYQAR                                        |
| <input checked="" type="checkbox"/> <a href="#">55</a>  | 403.2309 | 1206.6708 | 1206.6166 | 45.0   | 1    | 2     | 1.9    | 1    |        | SEKMLLEDVK + Oxidation (M)                     |
| <input checked="" type="checkbox"/> <a href="#">85</a>  | 416.2503 | 830.4860  | 830.4610  | 30.1   | 0    | 2     | 1.5    | 1    |        | SQLSQLR                                        |
| <input checked="" type="checkbox"/> <a href="#">207</a> | 472.5869 | 1414.7390 | 1414.7351 | 2.77   | 1    | 2     | 0.63   | 1    |        | SSMSGLHLVKQGR + Oxidation (M)                  |
| <input checked="" type="checkbox"/> <a href="#">282</a> | 583.2946 | 1164.5746 | 1164.5267 | 41.1   | 0    | 2     | 0.92   | 1    |        | IEAMLEQQR + Carbamidomethyl (C); Oxidation (M) |
| <input checked="" type="checkbox"/> <a href="#">210</a> | 477.3053 | 952.5960  | 952.5705  | 26.7   | 0    | 2     | 0.67   | 1    |        | LLEVLNPR                                       |
| <input checked="" type="checkbox"/> <a href="#">89</a>  | 420.2481 | 838.4816  | 838.4548  | 31.9   | 0    | 1     | 0.73   | 1    |        | KPSDPAPK                                       |
| <input checked="" type="checkbox"/> <a href="#">84</a>  | 416.2407 | 1245.7002 | 1245.6904 | 7.87   | 1    | 0     | 3      | 1    |        | QMIQVVKWAK + Oxidation (M)                     |
| <input checked="" type="checkbox"/> <a href="#">204</a> | 472.2870 | 942.5594  | 942.5611  | -1.70  | 1    | 0     | 0.91   | 1    |        | GNKILVSGR                                      |
| <input checked="" type="checkbox"/> <a href="#">1</a>   | 350.1971 | 698.3796  |           |        |      |       |        |      |        |                                                |
| <input checked="" type="checkbox"/> <a href="#">2</a>   | 350.2004 | 698.3863  |           |        |      |       |        |      |        |                                                |
| <input checked="" type="checkbox"/> <a href="#">3</a>   | 350.2039 | 698.3933  |           |        |      |       |        |      |        |                                                |
| <input checked="" type="checkbox"/> <a href="#">4</a>   | 350.2056 | 698.3967  |           |        |      |       |        |      |        |                                                |
| <input checked="" type="checkbox"/> <a href="#">5</a>   | 354.0738 | 706.1331  |           |        |      |       |        |      |        |                                                |
| <input checked="" type="checkbox"/> <a href="#">6</a>   | 355.0709 | 708.1272  |           |        |      |       |        |      |        |                                                |
| <input checked="" type="checkbox"/> <a href="#">7</a>   | 355.1950 | 708.3755  |           |        |      |       |        |      |        |                                                |
| <input checked="" type="checkbox"/> <a href="#">8</a>   | 362.1218 | 722.2291  |           |        |      |       |        |      |        |                                                |
| <input checked="" type="checkbox"/> <a href="#">9</a>   | 362.1947 | 722.3748  |           |        |      |       |        |      |        |                                                |
| <input checked="" type="checkbox"/> <a href="#">10</a>  | 362.2214 | 722.4283  |           |        |      |       |        |      |        |                                                |
| <input checked="" type="checkbox"/> <a href="#">11</a>  | 362.2220 | 722.4294  |           |        |      |       |        |      |        |                                                |
| <input checked="" type="checkbox"/> <a href="#">12</a>  | 362.2226 | 722.4306  |           |        |      |       |        |      |        |                                                |
| <input checked="" type="checkbox"/> <a href="#">13</a>  | 362.2226 | 722.4307  |           |        |      |       |        |      |        |                                                |
| <input checked="" type="checkbox"/> <a href="#">14</a>  | 362.2229 | 722.4312  |           |        |      |       |        |      |        |                                                |
| <input checked="" type="checkbox"/> <a href="#">15</a>  | 364.2262 | 726.4379  |           |        |      |       |        |      |        |                                                |
| <input checked="" type="checkbox"/> <a href="#">16</a>  | 368.0537 | 734.0929  |           |        |      |       |        |      |        |                                                |
| <input checked="" type="checkbox"/> <a href="#">17</a>  | 368.0947 | 734.1748  |           |        |      |       |        |      |        |                                                |
| <input checked="" type="checkbox"/> <a href="#">18</a>  | 368.1012 | 734.1879  |           |        |      |       |        |      |        |                                                |
| <input checked="" type="checkbox"/> <a href="#">19</a>  | 369.1918 | 736.3690  |           |        |      |       |        |      |        |                                                |
| <input checked="" type="checkbox"/> <a href="#">20</a>  | 369.9351 | 737.8556  |           |        |      |       |        |      |        |                                                |
| <input checked="" type="checkbox"/> <a href="#">21</a>  | 370.7346 | 739.4547  |           |        |      |       |        |      |        |                                                |
| <input checked="" type="checkbox"/> <a href="#">22</a>  | 372.2014 | 742.3883  |           |        |      |       |        |      |        |                                                |
| <input checked="" type="checkbox"/> <a href="#">23</a>  | 372.2020 | 742.3893  |           |        |      |       |        |      |        |                                                |
| <input checked="" type="checkbox"/> <a href="#">24</a>  | 373.1478 | 744.2810  |           |        |      |       |        |      |        |                                                |
| <input checked="" type="checkbox"/> <a href="#">25</a>  | 374.0657 | 746.1168  |           |        |      |       |        |      |        |                                                |
| <input checked="" type="checkbox"/> <a href="#">26</a>  | 376.0835 | 750.1524  |           |        |      |       |        |      |        |                                                |
| <input checked="" type="checkbox"/> <a href="#">27</a>  | 377.0885 | 752.1624  |           |        |      |       |        |      |        |                                                |
| <input checked="" type="checkbox"/> <a href="#">28</a>  | 377.8027 | 753.5909  |           |        |      |       |        |      |        |                                                |
| <input checked="" type="checkbox"/> <a href="#">29</a>  | 378.1180 | 754.2215  |           |        |      |       |        |      |        |                                                |
| <input checked="" type="checkbox"/> <a href="#">32</a>  | 381.2295 | 760.4444  |           |        |      |       |        |      |        |                                                |
| <input checked="" type="checkbox"/> <a href="#">33</a>  | 381.2297 | 760.4449  |           |        |      |       |        |      |        |                                                |

|                                     |                     |          |          |
|-------------------------------------|---------------------|----------|----------|
| <input checked="" type="checkbox"/> | <a href="#">34</a>  | 384.2344 | 766.4543 |
| <input checked="" type="checkbox"/> | <a href="#">35</a>  | 384.2358 | 766.4571 |
| <input checked="" type="checkbox"/> | <a href="#">36</a>  | 384.2360 | 766.4574 |
| <input checked="" type="checkbox"/> | <a href="#">37</a>  | 384.2368 | 766.4591 |
| <input checked="" type="checkbox"/> | <a href="#">38</a>  | 384.2376 | 766.4607 |
| <input checked="" type="checkbox"/> | <a href="#">39</a>  | 386.1001 | 770.1856 |
| <input checked="" type="checkbox"/> | <a href="#">40</a>  | 386.1069 | 770.1993 |
| <input checked="" type="checkbox"/> | <a href="#">41</a>  | 388.1730 | 774.3313 |
| <input checked="" type="checkbox"/> | <a href="#">42</a>  | 388.1958 | 774.3770 |
| <input checked="" type="checkbox"/> | <a href="#">43</a>  | 391.2236 | 780.4326 |
| <input checked="" type="checkbox"/> | <a href="#">44</a>  | 391.2830 | 780.5513 |
| <input checked="" type="checkbox"/> | <a href="#">45</a>  | 391.2837 | 780.5529 |
| <input checked="" type="checkbox"/> | <a href="#">46</a>  | 391.2838 | 780.5531 |
| <input checked="" type="checkbox"/> | <a href="#">47</a>  | 391.2849 | 780.5552 |
| <input checked="" type="checkbox"/> | <a href="#">48</a>  | 392.2408 | 782.4670 |
| <input checked="" type="checkbox"/> | <a href="#">49</a>  | 392.7470 | 783.4793 |
| <input checked="" type="checkbox"/> | <a href="#">52</a>  | 400.6154 | 799.2162 |
| <input checked="" type="checkbox"/> | <a href="#">54</a>  | 401.2611 | 800.5077 |
| <input checked="" type="checkbox"/> | <a href="#">59</a>  | 405.1381 | 808.2617 |
| <input checked="" type="checkbox"/> | <a href="#">60</a>  | 405.2235 | 808.4324 |
| <input checked="" type="checkbox"/> | <a href="#">61</a>  | 405.2243 | 808.4341 |
| <input checked="" type="checkbox"/> | <a href="#">62</a>  | 406.2465 | 810.4784 |
| <input checked="" type="checkbox"/> | <a href="#">63</a>  | 406.2482 | 810.4818 |
| <input checked="" type="checkbox"/> | <a href="#">64</a>  | 406.2486 | 810.4826 |
| <input checked="" type="checkbox"/> | <a href="#">65</a>  | 406.2486 | 810.4826 |
| <input checked="" type="checkbox"/> | <a href="#">66</a>  | 407.1495 | 812.2845 |
| <input checked="" type="checkbox"/> | <a href="#">67</a>  | 408.2405 | 814.4665 |
| <input checked="" type="checkbox"/> | <a href="#">68</a>  | 411.8111 | 821.6076 |
| <input checked="" type="checkbox"/> | <a href="#">69</a>  | 411.9217 | 821.8288 |
| <input checked="" type="checkbox"/> | <a href="#">70</a>  | 411.9229 | 821.8313 |
| <input checked="" type="checkbox"/> | <a href="#">71</a>  | 411.9239 | 821.8332 |
| <input checked="" type="checkbox"/> | <a href="#">72</a>  | 412.0831 | 822.1516 |
| <input checked="" type="checkbox"/> | <a href="#">73</a>  | 412.2282 | 822.4419 |
| <input checked="" type="checkbox"/> | <a href="#">74</a>  | 412.7521 | 823.4896 |
| <input checked="" type="checkbox"/> | <a href="#">75</a>  | 412.7524 | 823.4902 |
| <input checked="" type="checkbox"/> | <a href="#">76</a>  | 412.7531 | 823.4917 |
| <input checked="" type="checkbox"/> | <a href="#">77</a>  | 413.2269 | 824.4393 |
| <input checked="" type="checkbox"/> | <a href="#">78</a>  | 414.0972 | 826.1798 |
| <input checked="" type="checkbox"/> | <a href="#">79</a>  | 414.0998 | 826.1851 |
| <input checked="" type="checkbox"/> | <a href="#">80</a>  | 414.2141 | 826.4136 |
| <input checked="" type="checkbox"/> | <a href="#">81</a>  | 414.2200 | 826.4254 |
| <input checked="" type="checkbox"/> | <a href="#">82</a>  | 414.7623 | 827.5101 |
| <input checked="" type="checkbox"/> | <a href="#">83</a>  | 416.1078 | 830.2010 |
| <input checked="" type="checkbox"/> | <a href="#">86</a>  | 416.2508 | 830.4870 |
| <input checked="" type="checkbox"/> | <a href="#">87</a>  | 416.2513 | 830.4881 |
| <input checked="" type="checkbox"/> | <a href="#">88</a>  | 416.7479 | 831.4813 |
| <input checked="" type="checkbox"/> | <a href="#">90</a>  | 421.7569 | 841.4992 |
| <input checked="" type="checkbox"/> | <a href="#">91</a>  | 421.7575 | 841.5005 |
| <input checked="" type="checkbox"/> | <a href="#">92</a>  | 421.7576 | 841.5006 |
| <input checked="" type="checkbox"/> | <a href="#">93</a>  | 421.7577 | 841.5008 |
| <input checked="" type="checkbox"/> | <a href="#">94</a>  | 421.7579 | 841.5013 |
| <input checked="" type="checkbox"/> | <a href="#">95</a>  | 421.7582 | 841.5018 |
| <input checked="" type="checkbox"/> | <a href="#">96</a>  | 421.7582 | 841.5019 |
| <input checked="" type="checkbox"/> | <a href="#">97</a>  | 422.0508 | 842.0870 |
| <input checked="" type="checkbox"/> | <a href="#">98</a>  | 425.3103 | 848.6060 |
| <input checked="" type="checkbox"/> | <a href="#">99</a>  | 425.3109 | 848.6072 |
| <input checked="" type="checkbox"/> | <a href="#">100</a> | 426.2464 | 850.4783 |
| <input checked="" type="checkbox"/> | <a href="#">101</a> | 428.2618 | 854.5090 |
| <input checked="" type="checkbox"/> | <a href="#">102</a> | 428.2618 | 854.5090 |
| <input checked="" type="checkbox"/> | <a href="#">103</a> | 428.2619 | 854.5092 |
| <input checked="" type="checkbox"/> | <a href="#">104</a> | 428.2622 | 854.5098 |
| <input checked="" type="checkbox"/> | <a href="#">105</a> | 428.2622 | 854.5099 |
| <input checked="" type="checkbox"/> | <a href="#">106</a> | 428.2629 | 854.5113 |
| <input checked="" type="checkbox"/> | <a href="#">107</a> | 428.2638 | 854.5130 |
| <input checked="" type="checkbox"/> | <a href="#">108</a> | 428.7651 | 855.5157 |
| <input checked="" type="checkbox"/> | <a href="#">109</a> | 428.7654 | 855.5163 |
| <input checked="" type="checkbox"/> | <a href="#">110</a> | 428.7657 | 855.5169 |
| <input checked="" type="checkbox"/> | <a href="#">111</a> | 428.7665 | 855.5185 |
| <input checked="" type="checkbox"/> | <a href="#">112</a> | 433.7326 | 865.4505 |
| <input checked="" type="checkbox"/> | <a href="#">113</a> | 435.2474 | 868.4802 |
| <input checked="" type="checkbox"/> | <a href="#">114</a> | 435.7546 | 869.4947 |
| <input checked="" type="checkbox"/> | <a href="#">116</a> | 435.7557 | 869.4968 |
| <input checked="" type="checkbox"/> | <a href="#">117</a> | 435.7561 | 869.4977 |
| <input checked="" type="checkbox"/> | <a href="#">118</a> | 435.7670 | 869.5193 |
| <input checked="" type="checkbox"/> | <a href="#">119</a> | 435.7674 | 869.5202 |
| <input checked="" type="checkbox"/> | <a href="#">120</a> | 435.7707 | 869.5269 |
| <input checked="" type="checkbox"/> | <a href="#">121</a> | 435.7722 | 869.5299 |
| <input checked="" type="checkbox"/> | <a href="#">122</a> | 435.7727 | 869.5308 |
| <input checked="" type="checkbox"/> | <a href="#">123</a> | 436.7742 | 871.5339 |
| <input checked="" type="checkbox"/> | <a href="#">124</a> | 436.7743 | 871.5340 |
| <input checked="" type="checkbox"/> | <a href="#">125</a> | 437.2904 | 872.5662 |
| <input checked="" type="checkbox"/> | <a href="#">126</a> | 437.7516 | 873.4887 |
| <input checked="" type="checkbox"/> | <a href="#">127</a> | 440.1126 | 878.2106 |
| <input checked="" type="checkbox"/> | <a href="#">128</a> | 440.1141 | 878.2135 |
| <input checked="" type="checkbox"/> | <a href="#">129</a> | 442.0916 | 882.1686 |
| <input checked="" type="checkbox"/> | <a href="#">130</a> | 442.7625 | 883.5104 |
| <input checked="" type="checkbox"/> | <a href="#">132</a> | 442.7640 | 883.5134 |
| <input checked="" type="checkbox"/> | <a href="#">133</a> | 444.1069 | 886.1993 |
| <input checked="" type="checkbox"/> | <a href="#">134</a> | 445.2882 | 888.5619 |
| <input checked="" type="checkbox"/> | <a href="#">135</a> | 448.2127 | 894.4108 |
| <input checked="" type="checkbox"/> | <a href="#">136</a> | 448.2136 | 894.4126 |
| <input checked="" type="checkbox"/> | <a href="#">137</a> | 448.2144 | 894.4143 |
| <input checked="" type="checkbox"/> | <a href="#">138</a> | 449.7711 | 897.5276 |
| <input checked="" type="checkbox"/> | <a href="#">139</a> | 449.7714 | 897.5282 |



|                                     |                     |          |           |
|-------------------------------------|---------------------|----------|-----------|
| <input checked="" type="checkbox"/> | <a href="#">140</a> | 449.7717 | 897.5287  |
| <input checked="" type="checkbox"/> | <a href="#">141</a> | 450.2754 | 898.5362  |
| <input checked="" type="checkbox"/> | <a href="#">142</a> | 450.2758 | 898.5371  |
| <input checked="" type="checkbox"/> | <a href="#">143</a> | 450.2778 | 898.5410  |
| <input checked="" type="checkbox"/> | <a href="#">144</a> | 450.2972 | 898.5799  |
| <input checked="" type="checkbox"/> | <a href="#">145</a> | 450.2998 | 898.5850  |
| <input checked="" type="checkbox"/> | <a href="#">146</a> | 450.7898 | 899.5651  |
| <input checked="" type="checkbox"/> | <a href="#">147</a> | 451.2650 | 900.5154  |
| <input checked="" type="checkbox"/> | <a href="#">148</a> | 451.2677 | 900.5207  |
| <input checked="" type="checkbox"/> | <a href="#">149</a> | 453.0727 | 904.1309  |
| <input checked="" type="checkbox"/> | <a href="#">150</a> | 453.1271 | 904.2397  |
| <input checked="" type="checkbox"/> | <a href="#">151</a> | 453.7797 | 905.5447  |
| <input checked="" type="checkbox"/> | <a href="#">152</a> | 453.7806 | 905.5467  |
| <input checked="" type="checkbox"/> | <a href="#">153</a> | 453.7812 | 905.5478  |
| <input checked="" type="checkbox"/> | <a href="#">154</a> | 453.7815 | 905.5485  |
| <input checked="" type="checkbox"/> | <a href="#">155</a> | 453.7821 | 905.5495  |
| <input checked="" type="checkbox"/> | <a href="#">156</a> | 453.7823 | 905.5500  |
| <input checked="" type="checkbox"/> | <a href="#">157</a> | 453.7825 | 905.5505  |
| <input checked="" type="checkbox"/> | <a href="#">158</a> | 453.7825 | 905.5505  |
| <input checked="" type="checkbox"/> | <a href="#">159</a> | 453.7831 | 905.5515  |
| <input checked="" type="checkbox"/> | <a href="#">160</a> | 453.7831 | 905.5517  |
| <input checked="" type="checkbox"/> | <a href="#">161</a> | 453.7835 | 905.5524  |
| <input checked="" type="checkbox"/> | <a href="#">162</a> | 453.7835 | 905.5525  |
| <input checked="" type="checkbox"/> | <a href="#">163</a> | 453.7836 | 905.5526  |
| <input checked="" type="checkbox"/> | <a href="#">164</a> | 453.7837 | 905.5528  |
| <input checked="" type="checkbox"/> | <a href="#">165</a> | 453.7838 | 905.5530  |
| <input checked="" type="checkbox"/> | <a href="#">166</a> | 453.7838 | 905.5530  |
| <input checked="" type="checkbox"/> | <a href="#">167</a> | 453.7839 | 905.5532  |
| <input checked="" type="checkbox"/> | <a href="#">168</a> | 453.7839 | 905.5533  |
| <input checked="" type="checkbox"/> | <a href="#">169</a> | 453.7840 | 905.5535  |
| <input checked="" type="checkbox"/> | <a href="#">170</a> | 453.7844 | 905.5543  |
| <input checked="" type="checkbox"/> | <a href="#">171</a> | 453.7845 | 905.5544  |
| <input checked="" type="checkbox"/> | <a href="#">172</a> | 453.7845 | 905.5544  |
| <input checked="" type="checkbox"/> | <a href="#">173</a> | 453.7845 | 905.5545  |
| <input checked="" type="checkbox"/> | <a href="#">174</a> | 453.7846 | 905.5546  |
| <input checked="" type="checkbox"/> | <a href="#">175</a> | 453.7846 | 905.5547  |
| <input checked="" type="checkbox"/> | <a href="#">176</a> | 453.7847 | 905.5548  |
| <input checked="" type="checkbox"/> | <a href="#">177</a> | 453.7848 | 905.5551  |
| <input checked="" type="checkbox"/> | <a href="#">178</a> | 453.7850 | 905.5555  |
| <input checked="" type="checkbox"/> | <a href="#">179</a> | 453.7860 | 905.5574  |
| <input checked="" type="checkbox"/> | <a href="#">180</a> | 456.1074 | 910.2002  |
| <input checked="" type="checkbox"/> | <a href="#">182</a> | 458.7880 | 915.5613  |
| <input checked="" type="checkbox"/> | <a href="#">183</a> | 458.7885 | 915.5624  |
| <input checked="" type="checkbox"/> | <a href="#">184</a> | 460.0934 | 918.1722  |
| <input checked="" type="checkbox"/> | <a href="#">185</a> | 461.7471 | 921.4797  |
| <input checked="" type="checkbox"/> | <a href="#">186</a> | 462.2119 | 922.4093  |
| <input checked="" type="checkbox"/> | <a href="#">187</a> | 462.2153 | 922.4160  |
| <input checked="" type="checkbox"/> | <a href="#">188</a> | 462.2645 | 922.5145  |
| <input checked="" type="checkbox"/> | <a href="#">190</a> | 464.2535 | 926.4925  |
| <input checked="" type="checkbox"/> | <a href="#">191</a> | 466.1705 | 930.3265  |
| <input checked="" type="checkbox"/> | <a href="#">192</a> | 468.2049 | 934.3952  |
| <input checked="" type="checkbox"/> | <a href="#">193</a> | 471.7911 | 941.5677  |
| <input checked="" type="checkbox"/> | <a href="#">194</a> | 471.7921 | 941.5697  |
| <input checked="" type="checkbox"/> | <a href="#">195</a> | 471.7934 | 941.5723  |
| <input checked="" type="checkbox"/> | <a href="#">196</a> | 471.7936 | 941.5727  |
| <input checked="" type="checkbox"/> | <a href="#">197</a> | 471.7937 | 941.5729  |
| <input checked="" type="checkbox"/> | <a href="#">198</a> | 471.7948 | 941.5750  |
| <input checked="" type="checkbox"/> | <a href="#">199</a> | 471.7948 | 941.5750  |
| <input checked="" type="checkbox"/> | <a href="#">200</a> | 471.7957 | 941.5768  |
| <input checked="" type="checkbox"/> | <a href="#">201</a> | 471.7962 | 941.5779  |
| <input checked="" type="checkbox"/> | <a href="#">202</a> | 471.7965 | 941.5784  |
| <input checked="" type="checkbox"/> | <a href="#">203</a> | 471.7967 | 941.5789  |
| <input checked="" type="checkbox"/> | <a href="#">205</a> | 472.2891 | 942.5637  |
| <input checked="" type="checkbox"/> | <a href="#">206</a> | 472.2894 | 942.5642  |
| <input checked="" type="checkbox"/> | <a href="#">208</a> | 476.2520 | 950.4894  |
| <input checked="" type="checkbox"/> | <a href="#">211</a> | 479.2758 | 956.5369  |
| <input checked="" type="checkbox"/> | <a href="#">212</a> | 479.2885 | 956.5625  |
| <input checked="" type="checkbox"/> | <a href="#">213</a> | 479.2894 | 956.5642  |
| <input checked="" type="checkbox"/> | <a href="#">214</a> | 480.8017 | 959.5889  |
| <input checked="" type="checkbox"/> | <a href="#">215</a> | 481.1367 | 960.2588  |
| <input checked="" type="checkbox"/> | <a href="#">216</a> | 481.1433 | 960.2720  |
| <input checked="" type="checkbox"/> | <a href="#">218</a> | 481.6353 | 961.2560  |
| <input checked="" type="checkbox"/> | <a href="#">219</a> | 484.1808 | 966.3470  |
| <input checked="" type="checkbox"/> | <a href="#">220</a> | 486.2873 | 970.5600  |
| <input checked="" type="checkbox"/> | <a href="#">221</a> | 486.2979 | 970.5813  |
| <input checked="" type="checkbox"/> | <a href="#">224</a> | 487.2740 | 972.5334  |
| <input checked="" type="checkbox"/> | <a href="#">225</a> | 490.1785 | 978.3425  |
| <input checked="" type="checkbox"/> | <a href="#">226</a> | 494.3014 | 986.5882  |
| <input checked="" type="checkbox"/> | <a href="#">228</a> | 494.3022 | 986.5898  |
| <input checked="" type="checkbox"/> | <a href="#">229</a> | 495.2924 | 988.5702  |
| <input checked="" type="checkbox"/> | <a href="#">230</a> | 495.2927 | 988.5709  |
| <input checked="" type="checkbox"/> | <a href="#">231</a> | 500.9528 | 999.8911  |
| <input checked="" type="checkbox"/> | <a href="#">232</a> | 501.7951 | 1001.5756 |
| <input checked="" type="checkbox"/> | <a href="#">233</a> | 502.8147 | 1003.6149 |
| <input checked="" type="checkbox"/> | <a href="#">234</a> | 505.2692 | 1008.5238 |
| <input checked="" type="checkbox"/> | <a href="#">235</a> | 505.2707 | 1008.5268 |
| <input checked="" type="checkbox"/> | <a href="#">236</a> | 511.3268 | 1020.6390 |
| <input checked="" type="checkbox"/> | <a href="#">237</a> | 513.2397 | 1024.4648 |
| <input checked="" type="checkbox"/> | <a href="#">238</a> | 515.2991 | 1028.5836 |
| <input checked="" type="checkbox"/> | <a href="#">239</a> | 515.7415 | 1029.4685 |
| <input checked="" type="checkbox"/> | <a href="#">240</a> | 515.7428 | 1029.4710 |
| <input checked="" type="checkbox"/> | <a href="#">244</a> | 516.3145 | 1030.6144 |
| <input checked="" type="checkbox"/> | <a href="#">245</a> | 516.3156 | 1030.6167 |
| <input checked="" type="checkbox"/> | <a href="#">246</a> | 516.8274 | 1031.6402 |

|                                     |                     |          |           |
|-------------------------------------|---------------------|----------|-----------|
| <input checked="" type="checkbox"/> | <a href="#">247</a> | 517.2616 | 1032.5087 |
| <input checked="" type="checkbox"/> | <a href="#">248</a> | 517.2617 | 1032.5088 |
| <input checked="" type="checkbox"/> | <a href="#">249</a> | 519.7694 | 1037.5242 |
| <input checked="" type="checkbox"/> | <a href="#">251</a> | 523.8035 | 1045.5924 |
| <input checked="" type="checkbox"/> | <a href="#">252</a> | 524.8277 | 1047.6408 |
| <input checked="" type="checkbox"/> | <a href="#">253</a> | 528.7766 | 1055.5386 |
| <input checked="" type="checkbox"/> | <a href="#">254</a> | 530.2932 | 1058.5719 |
| <input checked="" type="checkbox"/> | <a href="#">255</a> | 533.2640 | 1064.5134 |
| <input checked="" type="checkbox"/> | <a href="#">256</a> | 533.3367 | 1064.6589 |
| <input checked="" type="checkbox"/> | <a href="#">257</a> | 356.2051 | 1065.5933 |
| <input checked="" type="checkbox"/> | <a href="#">258</a> | 357.2253 | 1068.6540 |
| <input checked="" type="checkbox"/> | <a href="#">259</a> | 536.3235 | 1070.6325 |
| <input checked="" type="checkbox"/> | <a href="#">260</a> | 538.3261 | 1074.6377 |
| <input checked="" type="checkbox"/> | <a href="#">261</a> | 538.3275 | 1074.6404 |
| <input checked="" type="checkbox"/> | <a href="#">262</a> | 538.8079 | 1075.6013 |
| <input checked="" type="checkbox"/> | <a href="#">266</a> | 554.2749 | 1106.5351 |
| <input checked="" type="checkbox"/> | <a href="#">267</a> | 369.9290 | 1106.7653 |
| <input checked="" type="checkbox"/> | <a href="#">268</a> | 560.3374 | 1118.6603 |
| <input checked="" type="checkbox"/> | <a href="#">269</a> | 560.3414 | 1118.6682 |
| <input checked="" type="checkbox"/> | <a href="#">272</a> | 570.3486 | 1138.6827 |
| <input checked="" type="checkbox"/> | <a href="#">273</a> | 571.3530 | 1140.6914 |
| <input checked="" type="checkbox"/> | <a href="#">274</a> | 571.3555 | 1140.6965 |
| <input checked="" type="checkbox"/> | <a href="#">275</a> | 571.3560 | 1140.6974 |
| <input checked="" type="checkbox"/> | <a href="#">279</a> | 582.1748 | 1162.3349 |
| <input checked="" type="checkbox"/> | <a href="#">280</a> | 582.3200 | 1162.6254 |
| <input checked="" type="checkbox"/> | <a href="#">281</a> | 582.8387 | 1163.6629 |
| <input checked="" type="checkbox"/> | <a href="#">283</a> | 586.8410 | 1171.6675 |
| <input checked="" type="checkbox"/> | <a href="#">285</a> | 590.3038 | 1178.5931 |
| <input checked="" type="checkbox"/> | <a href="#">286</a> | 590.3044 | 1178.5942 |
| <input checked="" type="checkbox"/> | <a href="#">287</a> | 590.3166 | 1178.6187 |
| <input checked="" type="checkbox"/> | <a href="#">288</a> | 590.3168 | 1178.6190 |
| <input checked="" type="checkbox"/> | <a href="#">289</a> | 590.8138 | 1179.6130 |
| <input checked="" type="checkbox"/> | <a href="#">290</a> | 597.3099 | 1192.6053 |
| <input checked="" type="checkbox"/> | <a href="#">291</a> | 597.3352 | 1192.6558 |
| <input checked="" type="checkbox"/> | <a href="#">292</a> | 608.8585 | 1215.7025 |
| <input checked="" type="checkbox"/> | <a href="#">293</a> | 406.7546 | 1217.2420 |
| <input checked="" type="checkbox"/> | <a href="#">294</a> | 410.2928 | 1227.8567 |
| <input checked="" type="checkbox"/> | <a href="#">295</a> | 615.3668 | 1228.7190 |
| <input checked="" type="checkbox"/> | <a href="#">296</a> | 411.9373 | 1232.7900 |
| <input checked="" type="checkbox"/> | <a href="#">297</a> | 412.2312 | 1233.6717 |
| <input checked="" type="checkbox"/> | <a href="#">298</a> | 412.2314 | 1233.6725 |
| <input checked="" type="checkbox"/> | <a href="#">299</a> | 416.2970 | 1245.8691 |
| <input checked="" type="checkbox"/> | <a href="#">300</a> | 628.3070 | 1254.5993 |
| <input checked="" type="checkbox"/> | <a href="#">301</a> | 628.8007 | 1255.5868 |
| <input checked="" type="checkbox"/> | <a href="#">302</a> | 421.7647 | 1262.2722 |
| <input checked="" type="checkbox"/> | <a href="#">304</a> | 635.3645 | 1268.7143 |
| <input checked="" type="checkbox"/> | <a href="#">305</a> | 639.3617 | 1276.7087 |
| <input checked="" type="checkbox"/> | <a href="#">307</a> | 430.2293 | 1287.6661 |
| <input checked="" type="checkbox"/> | <a href="#">308</a> | 651.8617 | 1301.7089 |
| <input checked="" type="checkbox"/> | <a href="#">309</a> | 661.8581 | 1321.7016 |
| <input checked="" type="checkbox"/> | <a href="#">310</a> | 442.5891 | 1324.7455 |
| <input checked="" type="checkbox"/> | <a href="#">311</a> | 442.5903 | 1324.7491 |
| <input checked="" type="checkbox"/> | <a href="#">313</a> | 465.2496 | 1392.7271 |
| <input checked="" type="checkbox"/> | <a href="#">314</a> | 356.0277 | 1420.0818 |
| <input checked="" type="checkbox"/> | <a href="#">315</a> | 478.9282 | 1433.7629 |
| <input checked="" type="checkbox"/> | <a href="#">316</a> | 725.9364 | 1449.8582 |
| <input checked="" type="checkbox"/> | <a href="#">317</a> | 738.3971 | 1474.7797 |
| <input checked="" type="checkbox"/> | <a href="#">318</a> | 738.3972 | 1474.7798 |
| <input checked="" type="checkbox"/> | <a href="#">319</a> | 498.5838 | 1492.7295 |
| <input checked="" type="checkbox"/> | <a href="#">320</a> | 381.0246 | 1520.0692 |
| <input checked="" type="checkbox"/> | <a href="#">321</a> | 769.3241 | 1536.6336 |
| <input checked="" type="checkbox"/> | <a href="#">322</a> | 547.3182 | 1638.9327 |
| <input checked="" type="checkbox"/> | <a href="#">323</a> | 547.3186 | 1638.9339 |
| <input checked="" type="checkbox"/> | <a href="#">324</a> | 422.9514 | 1687.7764 |
| <input checked="" type="checkbox"/> | <a href="#">325</a> | 425.0065 | 1695.9970 |
| <input checked="" type="checkbox"/> | <a href="#">326</a> | 439.8102 | 1755.2116 |
| <input checked="" type="checkbox"/> | <a href="#">336</a> | 449.7683 | 1795.0440 |
| <input checked="" type="checkbox"/> | <a href="#">337</a> | 456.5015 | 1821.9768 |
| <input checked="" type="checkbox"/> | <a href="#">338</a> | 492.8200 | 1967.2509 |
| <input checked="" type="checkbox"/> | <a href="#">339</a> | 512.0359 | 2044.1147 |
| <input checked="" type="checkbox"/> | <a href="#">340</a> | 514.0896 | 2052.3291 |
| <input checked="" type="checkbox"/> | <a href="#">341</a> | 428.0798 | 2562.4349 |
| <input checked="" type="checkbox"/> | <a href="#">342</a> | 485.8102 | 2908.8172 |

## Search Parameters

Type of search : MS/MS Ion Search  
Enzyme : Trypsin  
Variable modifications : [Carbamidomethyl \(C\)](#), [Oxidation \(M\)](#)  
Mass values : Monoisotopic  
Protein Mass : Unrestricted  
Peptide Mass Tolerance :  $\pm$  50 ppm  
Fragment Mass Tolerance:  $\pm$  0.6 Da  
Max Missed Cleavages : 1  
Instrument type : ESI-QUAD-TOF  
Number of queries : 342

Mascot: <http://www.matrixscience.com/>
