# Supplementary material for: A novel chemotactic factor derived from the extracellular matrix protein decorin recruits mesenchymal stromal cells in vitro and in vivo
Source: PubMed Central journal article supplement (PMC7357784; doi:10.1371/journal.pone.0235784), 2020-07-13
Supplement: pone.0235784.s006.pdf [file pone.0235784.s006.pdf]

**S6 Fig: Raw Image 1. Tris-Glycine SDS-PAGE**

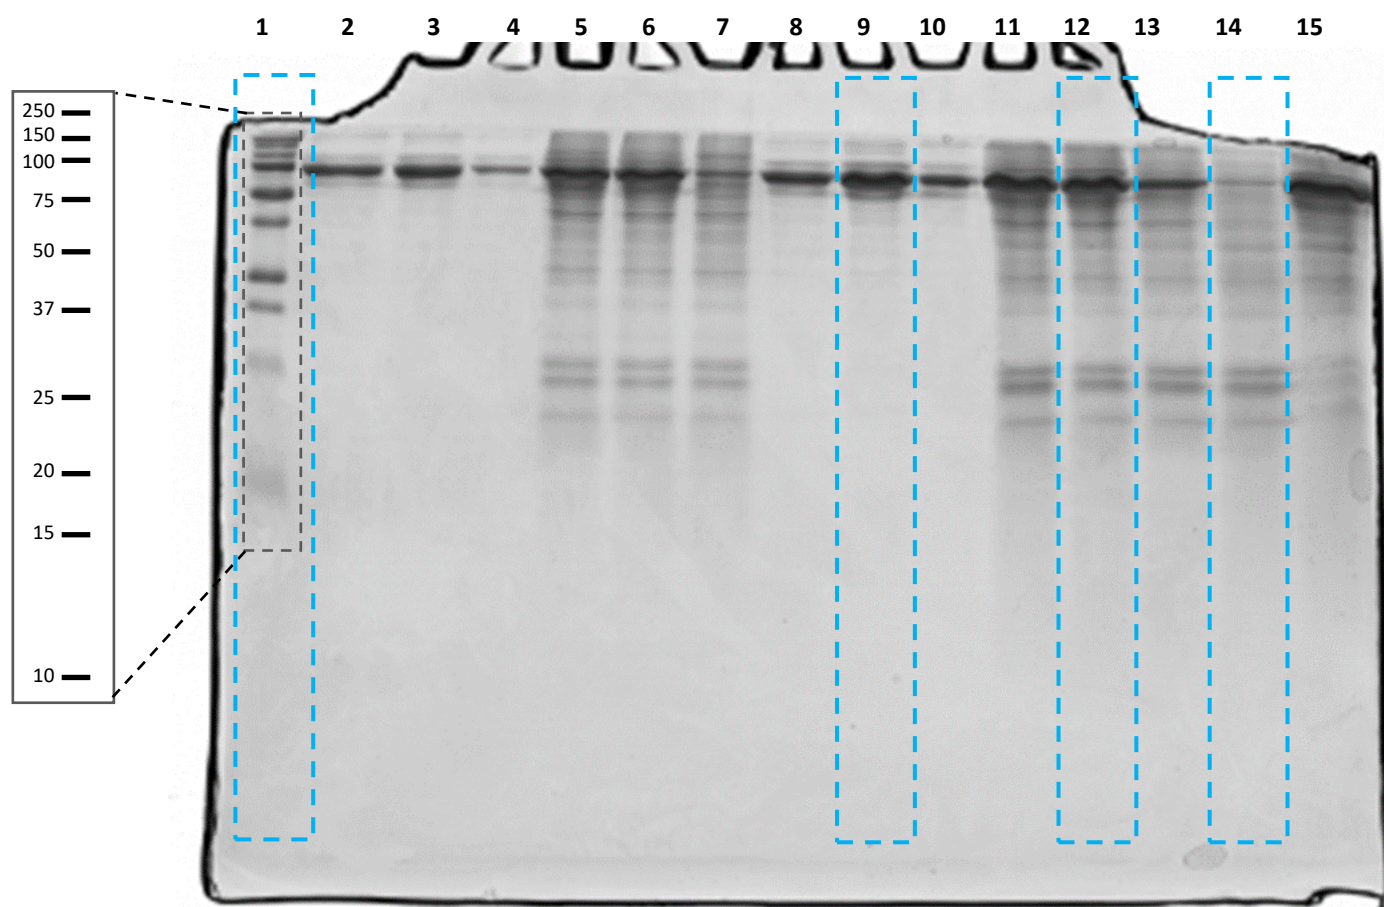

Experimental: Samples of conditioned media (30  $\mu$ L) were diluted 3:1 with 4x Laemmli buffer. Tris-glycine gels (4% acrylamide stacking gel and a 20% acrylamide resolving gel) were made with a BioRad gel system and run with a glycine running buffer (25 mM Tris, 192 mM glycine, 0.1% w/v SDS, pH 8.3) (Sigma-Aldrich). A total volume of 15  $\mu$ L of each sample was loaded per well and 8  $\mu$ L of protein standard ladder (Precision Plus Protein™ Dual Color Standards, BioRad, Hercules, CA, United States). Tris-glycine gels were run for 1 h at 100 V. Gel was stained with Coomassie.

| Lane | Sample/Comment                                    | Lane                                                 | Sample/Comment                                     |
|------|---------------------------------------------------|------------------------------------------------------|----------------------------------------------------|
| 1    | Marker                                            | 9                                                    | *OFM <sub>FITC10</sub> (48 h incubation)           |
| 2    | OFM (24 h incubation)                             | 10                                                   | OFM <sub>FITC30</sub> (48 h incubation)            |
| 3    | OFM <sub>FITC10</sub> (24 h incubation)           | 11                                                   | M $\phi$ +OFM (48 h incubation)                    |
| 4    | OFM <sub>FITC30</sub> (24 h incubation)           | 12                                                   | *M $\phi$ +OFM <sub>FITC10</sub> (48 h incubation) |
| 5    | M $\phi$ +OFM (24 h incubation)                   | 13                                                   | M $\phi$ +OFM <sub>FITC30</sub> (48 h incubation)  |
| 6    | M $\phi$ +OFM <sub>FITC10</sub> (24 h incubation) | 14                                                   | *M $\phi$ (48 h incubation)                        |
| 7    | M $\phi$ +OFM <sub>FITC30</sub> (24 h incubation) | 15                                                   | OFM (48 h incubation)                              |
| 8    | OFM (48 h incubation)                             | * - denotes lanes used in Fig2.A (dashed blue line). |                                                    |

**S6 Fig: Raw Image 2. Tris-Glycine SDS-PAGE**

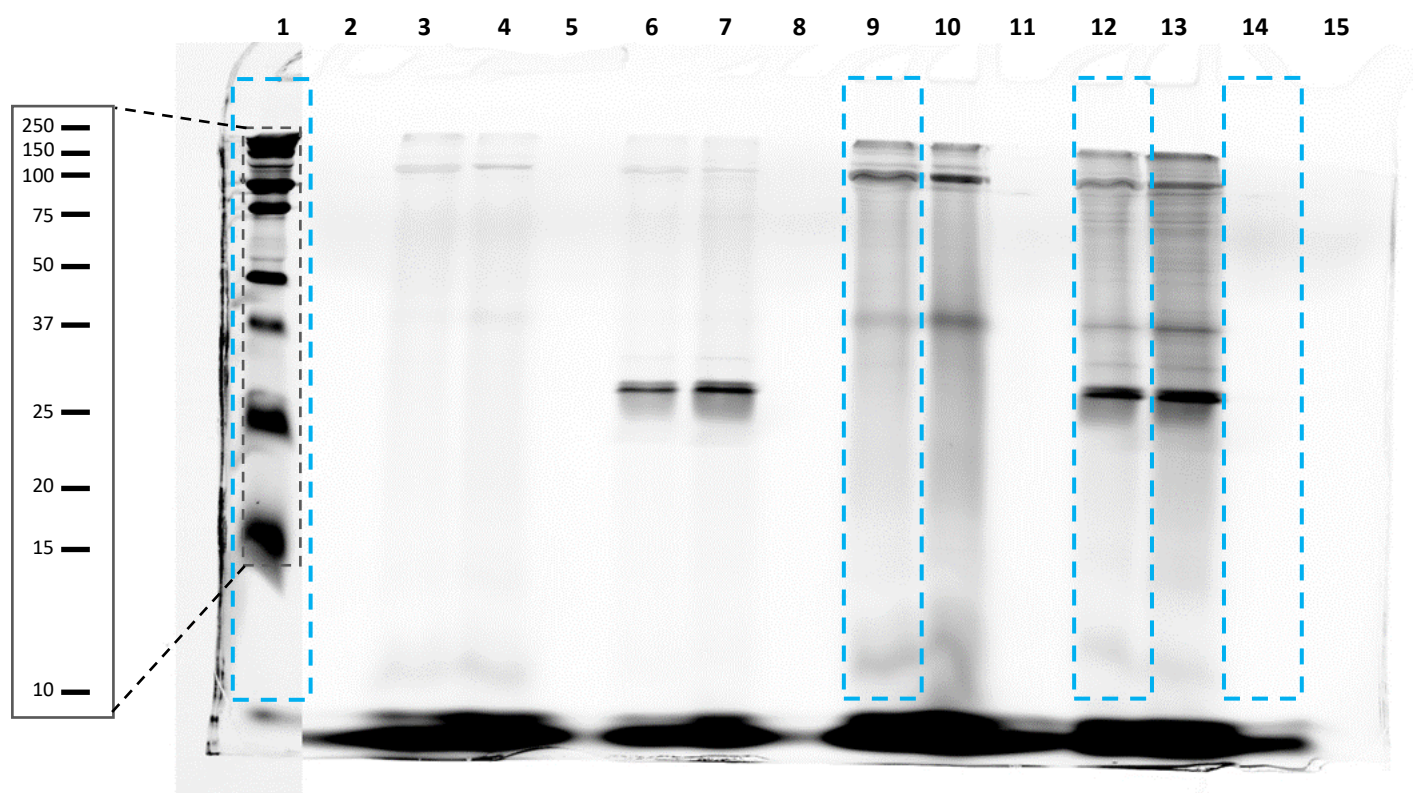

Experimental: Experimental: Samples of conditioned media (30  $\mu$ L) were diluted 3:1 with 4x Laemmli buffer. Tris-glycine gels (4% acrylamide stacking gel and a 20% acrylamide resolving gel) were made with a BioRad gel system and run with a glycine running buffer (25 mM Tris, 192 mM glycine, 0.1% w/v SDS, pH 8.3) (Sigma-Aldrich). A total volume of 15  $\mu$ L of each sample was loaded per well and 8  $\mu$ L of protein standard ladder (Precision Plus Protein™ Dual Color Standards, BioRad, Hercules, CA, United States). Tris-glycine gels were run for 1 h at 100 V. Gel was imaged using a Fluoroskan Ascent FL (Thermo Fisher Scientific). Using red and FITC channels

| Lane | Sample/Comment                                    | Lane                                                 | Sample/Comment                                     |
|------|---------------------------------------------------|------------------------------------------------------|----------------------------------------------------|
| 1    | Marker                                            | 9                                                    | *OFM <sub>FITC10</sub> (48 h incubation)           |
| 2    | OFM (24 h incubation)                             | 10                                                   | OFM <sub>FITC30</sub> (48 h incubation)            |
| 3    | OFM <sub>FITC10</sub> (24 h incubation)           | 11                                                   | M $\phi$ +OFM (48 h incubation)                    |
| 4    | OFM <sub>FITC30</sub> (24 h incubation)           | 12                                                   | *M $\phi$ +OFM <sub>FITC10</sub> (48 h incubation) |
| 5    | M $\phi$ +OFM (24 h incubation)                   | 13                                                   | M $\phi$ +OFM <sub>FITC30</sub> (48 h incubation)  |
| 6    | M $\phi$ +OFM <sub>FITC10</sub> (24 h incubation) | 14                                                   | *M $\phi$ (48 h incubation)                        |
| 7    | M $\phi$ +OFM <sub>FITC30</sub> (24 h incubation) | 15                                                   | OFM (48 h incubation)                              |
| 8    | OFM (48 h incubation)                             | * - denotes lanes used in Fig2.B (dashed blue line). |                                                    |

S6 Fig: Raw Image 3. Tris-Tricine SDS-PAGE

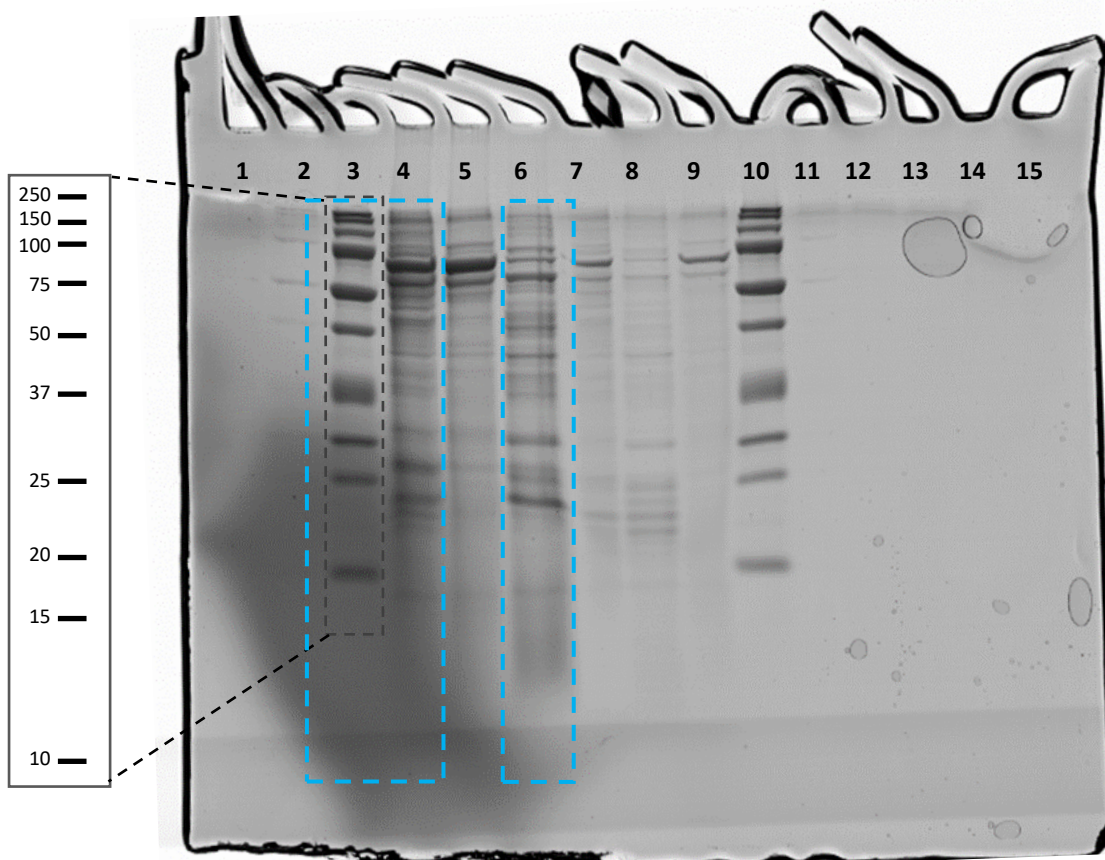

Experimental: Samples were diluted 3:1 with 4x Laemmli buffer. A total volume of 15  $\mu$ L of each sample was loaded per well and 8  $\mu$ L of protein standard ladder (Precision Plus Protein™ Dual Color Standards, BioRad). Tris-Tricine gels (4% acrylamide stacking gel and a 16% acrylamide resolving gel) were run using a cathode buffer (100 mM Tris, 100 mM tricine, 0.1% w/v SDS, pH 8.25) and an anode buffer (100 mM Tris, pH 8.9). Gels were run for 2 h at 60 V on ice ( $\sim$ 4  $^{\circ}$ C). Gel was stained with Coomassie.

| Lane | Sample/Comment                                  | Lane                                                 | Sample/Comment           |
|------|-------------------------------------------------|------------------------------------------------------|--------------------------|
| 1    | X, empty                                        | 9                                                    | M $\phi$ (1/10 dilution) |
| 2    | X, empty                                        | 10                                                   | Marker                   |
| 3    | *Marker                                         | 11                                                   | X, empty                 |
| 4    | *M $\phi$ +OFM <sub>FITC10</sub> (neat)         | 12                                                   | X, empty                 |
| 5    | M $\phi$ +OFM (neat)                            | 13                                                   | X, empty                 |
| 6    | *M $\phi$ (neat)                                | 14                                                   | X, empty                 |
| 7    | M $\phi$ +OFM <sub>FITC10</sub> (1/10 dilution) | 15                                                   | X, empty                 |
| 8    | M $\phi$ +OFM (1/10 dilution)                   | * - denotes lanes used in Fig3.A (dashed blue line). |                          |

**S6 Fig: Raw Image 4. Tris-Tricine SDS-PAGE**

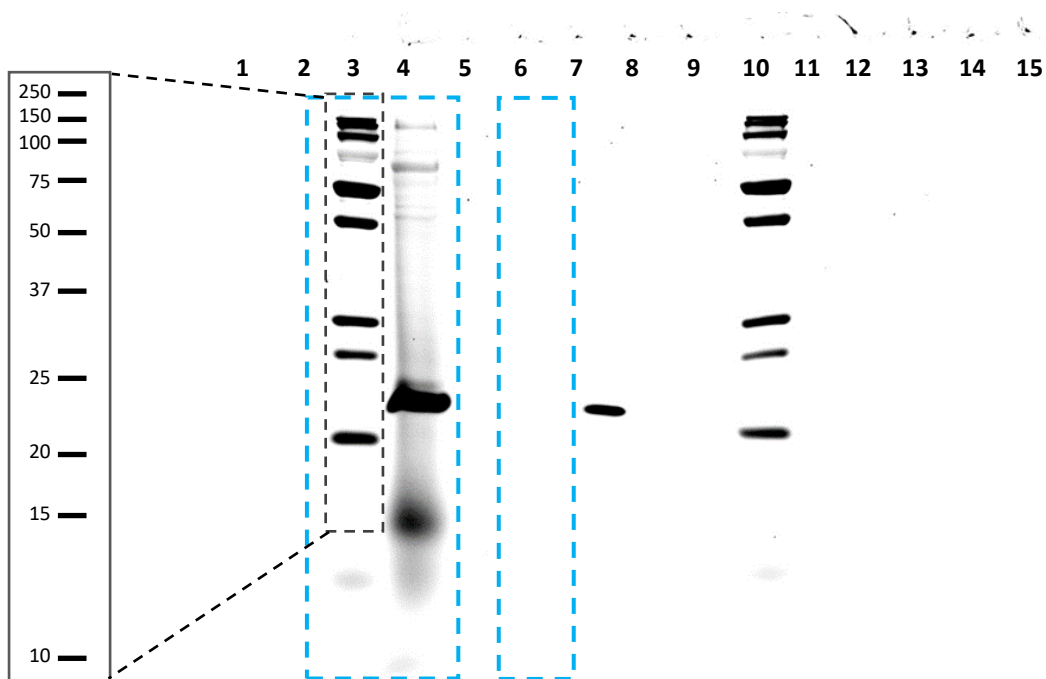

Experimental: Samples were diluted 3:1 with 4x Laemlie buffer. A total volume of 15  $\mu$ L of each sample was loaded per well and 8  $\mu$ L of protein standard ladder (Precision Plus Protein™ Dual Color Standards, BioRad). Tris-Tricine gels (4% acrylamide stacking gel and a 16% acrylamide resolving gel) were run using a cathode buffer (100 mM Tris, 100 mM tricine, 0.1% w/v SDS, pH 8.25) and an anode buffer (100 mM Tris, pH 8.9). Gels were run for 2 h at 60 V on ice ( $\sim$ 4  $^{\circ}$ C). Gel was imaged using a Fluoroskan Ascent FL (Thermo Fisher Scientific).

| Lane | Sample/Comment                                  | Lane                                                 | Sample/Comment           |
|------|-------------------------------------------------|------------------------------------------------------|--------------------------|
| 1    | X, empty                                        | 9                                                    | M $\phi$ (1/10 dilution) |
| 2    | X, empty                                        | 10                                                   | Marker                   |
| 3    | *Marker                                         | 11                                                   | X, empty                 |
| 4    | *M $\phi$ +OFM <sub>FITC10</sub> (neat)         | 12                                                   | X, empty                 |
| 5    | M $\phi$ +OFM (neat)                            | 13                                                   | X, empty                 |
| 6    | *M $\phi$ (neat)                                | 14                                                   | X, empty                 |
| 7    | M $\phi$ +OFM <sub>FITC10</sub> (1/10 dilution) | 15                                                   | X, empty                 |
| 8    | M $\phi$ +OFM (1/10 dilution)                   | * - denotes lanes used in Fig3.B (dashed blue line). |                          |

**S6 Fig: Raw Image 5. Bis-Tris SDS-PAGE**

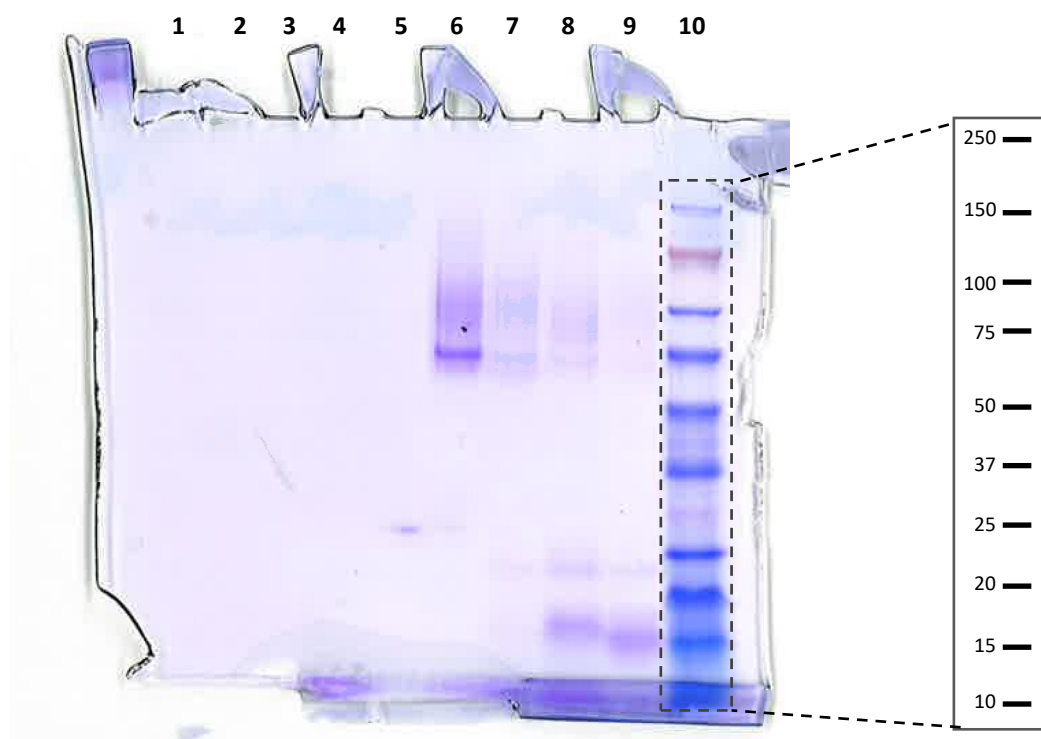

Experimental: Samples were diluted 3:1 with 4x Laemmli buffer and denatured, as described above. A total volume of 30 mL was loaded onto precast Bis-Tris gels (4-12% Bolt NuPAGE, Invitrogen, Carlsbad, CA, USA). Bis-Tris gels were run with a protein standard solution (5 mL) (SeeBlue protein standard, Invitrogen). Gels were run using an Invitrogen Mini Gel system ( Invitrogen™) in a BOLT running buffer (Bolt™ MES SDS Running Buffer, Invitrogen™) for 90 mins at 100 V. Gels were rinsed (3x, ROH<sub>2</sub>O, 10 mL) and then stained with Coomassie.

| Lane | Sample/Comment                    | Lane | Sample/Comment                  |
|------|-----------------------------------|------|---------------------------------|
| 1    | X, empty                          | 9    | DCN (0.25 ug + MMP12 (0.25 µg)) |
| 2    | X, empty                          | 10   | Marker                          |
| 3    | X, empty                          |      |                                 |
| 4    | X, empty                          |      |                                 |
| 5    | MMP12 (2.5 µg)                    |      |                                 |
| 6    | DCN (2.5 µg)                      |      |                                 |
| 7    | DCN (0.25 ug + MMP12 (0.0025 µg)) |      |                                 |
| 8    | DCN (0.25 ug + MMP12 (0.125 µg))  |      |                                 |
